# Supplementary material for: An analysis of the Wheeler-Lea act and its administrative agency, the Federal Trade Commission
Source: Royal Society of Chemistry journal article supplement (doi:10.1039/b415374j), 1951-01-01
Supplement: b415374j(1).pdf [file b415374j%281%29.pdf]

## Experimental

The raw materials of tetrabromocavitands and trimethyl-5-pyrimidyl stannane were prepared according to the method reported in the references of 14 and 16, respectively.

### **7,11,15,28-Tetrakis(5-pyrimidyl)-1,21,23,25-tetrakis(2-phenylethyl)-2,20:3,19-di-methano-1*H*,21*H*,-23*H*,25*H*-bis[1,3]dioxocino[5,4-*i*:5',4'-*i*']benzo[1,2-*d*:5,4-*d*']bis-[1,3]benzodioxocin Stereoisomer (**1**)**

The mixture of trimethyl-5-pyrimidyl stannane (1.55 g, 6.39 mmol), tetrabromocavitands (1.02g, 0.80 mmol), and PdCl<sub>2</sub>(PPh<sub>3</sub>)<sub>2</sub> (0.17 g, 0.33 mmol) in anhydrous toluene (160 cm<sup>3</sup>) was refluxed under argon at 120 °C for six days. The resulting solution was poured into water and extracted from ethyl acetate. The yellow solution obtained was evaporated to dryness to leave yellow solid and it was purified by column chromatography (elute, CH<sub>2</sub>Cl<sub>2</sub> : EtOH = 85 : 15). The **1** was obtained 0.54 g and the yield is 53.2%. (R<sub>f</sub> = 0.3) <sup>1</sup>H-NMR (CDCl<sub>3</sub>) δ(ppm), 2.65-2.78 (*m*, 16H, -CH<sub>2</sub>CH<sub>2</sub>), 4.28 (*d*, 4H, inner of OCH<sub>2</sub>), 4.98(*t*, 4H,N -CH), 5.44 (*d*, 4H,outer of OCH<sub>2</sub>), 7.18-7.30 (*m*, 20H, -CH<sub>2</sub>CH<sub>2</sub>Ph), 8.46 (*s*, 8H,NCHC), 9.13 (*s*, 4H,NCHN); FAB-mass *m/z*=1266 (M+H<sup>+</sup>); Anal. Calcd for C<sub>80</sub>H<sub>64</sub>O<sub>8</sub>N<sub>8</sub>•H<sub>2</sub>O: C, 74.87%; H, 5.18%; N, 8.73%,

Found C, 75.17%; H, 5.08%; N, 8.76%.

### Preparations of coordination polymers (2 ~ 5)

Mn(hfac)<sub>2</sub>·H<sub>2</sub>O (8 mg, 0.016mmol) and the **1** (5 mg, 0.004 mmol) was reacted in ethyl acetate (10 cm<sup>3</sup>) at 60 °C. The solution was gradually concentrated in the air. After a week, yellow prismatic crystals of **2** were formed. The crystals of **3**, **4**, and **5** were obtained in the similar way using Cu(hfac)<sub>2</sub>·H<sub>2</sub>O, Ni(hfac)<sub>2</sub>·2H<sub>2</sub>O and Co(hfac)<sub>2</sub>·H<sub>2</sub>O instead of Mn(hfac)<sub>2</sub>·H<sub>2</sub>O, respectively. The elemental analyses were carried out for all crystals of **2** to **5** treated under vacuum dried at 100 °C for 6 hours.

Anal. Calcd for **2** (MnC<sub>90</sub>H<sub>66</sub>N<sub>8</sub>O<sub>12</sub>F<sub>12</sub>·5H<sub>2</sub>O): Mn, 3.01%, C, 59.25%; H, 4.20%; N, 6.14%, Found: Mn, 3.43%, C, 59.55%; H, 3.92%; N, 5.88%. Calcd for **3** (Ni<sub>2</sub>C<sub>100</sub>H<sub>68</sub>N<sub>8</sub>O<sub>16</sub>F<sub>24</sub>·2H<sub>2</sub>O): Ni, 5.22%, C, 53.45%; H, 3.23%; N, 4.99%, Found: Ni, 5.36%, C, 53.42%; H, 3.02%; N, 4.93%. Calcd for **4** (CuC<sub>90</sub>H<sub>66</sub>N<sub>8</sub>O<sub>12</sub>F<sub>12</sub>·2H<sub>2</sub>O): Cu, 3.57%, C, 60.47%; H, 3.97%; N, 6.30%, Found: Cu, 3.69%, C, 60.75%; H, 3.77%; N, 6.12%. Calcd for **5** (Co<sub>2</sub>C<sub>100</sub>H<sub>68</sub>N<sub>8</sub>O<sub>16</sub>F<sub>24</sub>): Co, 5.33%, C, 54.31%; H, 3.10%; N, 5.07%, Found: Co, 5.24%, C, 54.16%; H, 3.15%; N, 5.02%.
