# Supplementary material for: An analysis of the Wheeler-Lea act and its administrative agency, the Federal Trade Commission
Source: Royal Society of Chemistry journal article supplement (doi:10.1039/b415374j), 1951-01-01
Supplement: b415374j(2).pdf [file b415374j%282%29.pdf]

# X-ray Structure Report

Fri Nov 12 2004

## Experimental

### Data Collection

A yellow prismatic crystal of  $C_{102}H_{90}O_{18}N_8F_{12}Mn$  having approximate dimensions of 0.20 x 0.40 x 0.15 mm was mounted in a glass capillary. All measurements were made on a Rigaku AFC7R diffractometer with graphite monochromated Mo-K $\alpha$  radiation and a rotating anode generator.

Cell constants and an orientation matrix for data collection, obtained from a least-squares refinement using the setting angles of 25 carefully centered reflections in the range  $30.69 < 2\theta < 34.44^\circ$  corresponded to a primitive monoclinic cell with dimensions:

$$\begin{aligned}a &= 13.689(4) \text{ \AA} \\b &= 44.935(6) \text{ \AA} \quad \beta = 108.50(2)^\circ \\c &= 16.354(4) \text{ \AA} \\V &= 9539(4) \text{ \AA}^3\end{aligned}$$

For  $Z = 4$  and  $F.W. = 1998.79$ , the calculated density is  $1.39 \text{ g/cm}^3$ . The systematic absences of:

$$\begin{aligned}h0l: l \neq 2n \\0k0: k \neq 2n\end{aligned}$$

uniquely determine the space group to be:

$$P2_1/c \text{ (\#14)}$$

The data were collected at a temperature of  $-70 \pm 1^\circ\text{C}$  using the  $\omega$ - $2\theta$  scan technique to a maximum  $2\theta$  value of  $50.0^\circ$ . Omega scans of several intense reflections, made prior to data collection, had an average width at half-height of  $0.42^\circ$  with a take-off angle of  $6.0^\circ$ . Scans of  $(1.31 + 0.30 \tan \theta)^\circ$  were made at a speed of  $16.0^\circ/\text{min}$  (in omega). The weak reflections ( $I < 10.0\sigma(I)$ ) were rescanned (maximum of 5 scans) and the counts were accumulated to ensure good counting statistics. Stationary background counts were recorded on each side of the reflection. The ratio of peak counting time to background counting time was 2:1. The diameter of the incident beam collimator was 6.0 mm and the crystal to detector distance was 400 mm, The computer-controlled slits were set to 9.0 mm (horizontal) and 13.0 mm (vertical).

### Data Reduction

Of the 16524 reflections which were collected, 0 were unique ( $R_{int} = 0.026$ ). The intensities of three representative reflection were measured after every 150 reflections. Over the course of data collection, the standards decreased by 0.5%. A linear correction factor was applied to the data to account for this phenomenon.

The linear absorption coefficient,  $\mu$ , for Mo-K $\alpha$  radiation is  $2.3 \text{ cm}^{-1}$ . An empirical absorption correction based on azimuthal scans of several reflections was applied which resulted in transmission factors ranging from 0.92 to 1.00.

## Structure Solution and Refinement

The structure was solved by direct methods<sup>1</sup> and expanded using Fourier techniques<sup>2</sup>. Some non-hydrogen atoms were refined anisotropically, while the rest were refined isotropically. Hydrogen atoms were included but not refined. The final cycle of full-matrix least-squares refinement<sup>3</sup> was based on 5503 observed reflections ( $I > 3.00\sigma(I)$ ,  $2\theta < 50.03$ ) and 1034 variable parameters and converged (largest parameter shift was 0.01 times its esd) with unweighted and weighted agreement factors of:

$$R = \Sigma||Fo| - |Fc||/\Sigma|Fo| = 0.082$$

$$R_w = \sqrt{\Sigma w(|Fo| - |Fc|)^2 / \Sigma w Fo^2} = 0.122$$

$$R1 = \Sigma||Fo| - |Fc||/\Sigma|Fo| = 0.082 \quad \text{for } I > 3.0\sigma(I) \text{ data}$$

The standard deviation of an observation of unit weight<sup>4</sup> was 1.31. The weighting scheme was based on counting statistics and included a factor ( $p = 0.171$ ) to downweight the intense reflections. Plots of  $\Sigma w(|Fo| - |Fc|)^2$  versus  $|Fo|$ , reflection order in data collection,  $\sin \theta/\lambda$  and various classes of indices showed no unusual trends. The maximum and minimum peaks on the final difference Fourier map corresponded to 1.27 and  $-0.64 e^-/\text{\AA}^3$ , respectively.

Neutral atom scattering factors were taken from Cromer and Waber<sup>5</sup>. Anomalous dispersion effects were included in Fcalc<sup>6</sup>; the values for  $\Delta f'$  and  $\Delta f''$  were those of Creagh and McAuley<sup>7</sup>. The values for the mass attenuation coefficients are those of Creagh and Hubbel<sup>8</sup>. All calculations were performed using the teXsan<sup>9</sup> crystallographic software package of Molecular Structure Corporation.

## *References*

(1) SIR92: Altomare, A., Burla, M.C., Camalli, M., Cascarano, M., Giacovazzo, C., Guagliardi, A., Polidori, G., (1994). *J. Appl. Cryst.* 27, 435.

(2) DIRDIF94: Beurskens, P.T., Admiraal, G., Beurskens, G., Bosman, W.P., de Gelder, R., Israel, R. and Smits, J.M.M. (1994). The DIRDIF-94 program system, Technical Report of the Crystallography Laboratory, University of Nijmegen, The Netherlands.

(3) Least-Squares:

Function minimized:  $\Sigma w(|Fo| - |Fc|)^2$

$$\text{where } w = \frac{1}{\sigma^2(Fo)} = [\sigma_c^2(Fo) + \frac{v}{4} Fo^2]^{-1}$$

$\sigma_c(Fo)$  = e.s.d. based on counting statistics

$p$  = p-factor

(4) Standard deviation of an observation of unit weight:

$$\sqrt{\Sigma w(|Fo| - |Fc|)^2 / (No - Nv)}$$

where: No = number of observations

Nv = number of variables

(5) Cromer, D. T. & Waber, J. T.; "International Tables for X-ray Crystallography", Vol. IV, The Kynoch Press, Birmingham, England, Table 2.2 A (1974).

(6) Ibers, J. A. & Hamilton, W. C.; Acta Crystallogr., 17, 781 (1964).

(7) Creagh, D. C. & McAuley, W.J. ; "International Tables for Crystallography", Vol C, (A.J.C. Wilson, ed.), Kluwer Academic Publishers, Boston, Table 4.2.6.8, pages 219-222 (1992).

(8) Creagh, D. C. & Hubbell, J.H.; "International Tables for Crystallography", Vol C, (A.J.C. Wilson, ed.), Kluwer Academic Publishers, Boston, Table 4.2.4.3, pages 200-206 (1992).

(9) teXsan: Crystal Structure Analysis Package, Molecular Structure Corporation (1985 & 1999).

## EXPERIMENTAL DETAILS

### A. Crystal Data

|                                                                        |                                                                                                                                                       |
|------------------------------------------------------------------------|-------------------------------------------------------------------------------------------------------------------------------------------------------|
| Empirical Formula                                                      | $C_{102}H_{90}O_{18}N_8F_{12}Mn$                                                                                                                      |
| Formula Weight                                                         | 1998.79                                                                                                                                               |
| Crystal Color, Habit                                                   | yellow, prismatic                                                                                                                                     |
| Crystal Dimensions                                                     | 0.20 X 0.40 X 0.15 mm                                                                                                                                 |
| Crystal System                                                         | monoclinic                                                                                                                                            |
| Lattice Type                                                           | Primitive                                                                                                                                             |
| No. of Reflections Used for Unit Cell Determination ( $2\theta$ range) | 25 ( 30.7 - 34.4° )                                                                                                                                   |
| Omega Scan Peak Width at Half-height                                   | 0.42°                                                                                                                                                 |
| Lattice Parameters                                                     | $a = 13.689(4) \text{ \AA}$<br>$b = 44.935(6) \text{ \AA}$<br>$c = 16.354(4) \text{ \AA}$<br>$\beta = 108.50(2)^\circ$<br>$V = 9539(4) \text{ \AA}^3$ |
| Space Group                                                            | $P2_1/c$ (#14)                                                                                                                                        |
| Z value                                                                | 4                                                                                                                                                     |
| $D_{calc}$                                                             | 1.392 g/cm <sup>3</sup>                                                                                                                               |
| $F_{000}$                                                              | 4140.00                                                                                                                                               |
| $\mu(\text{MoK}\alpha)$                                                | 2.35 cm <sup>-1</sup>                                                                                                                                 |

### B. Intensity Measurements

|                |                                                                            |
|----------------|----------------------------------------------------------------------------|
| Diffractometer | Rigaku AFC7R (rotating anode)                                              |
| Radiation      | MoK $\alpha$ ( $\lambda = 0.71069 \text{ \AA}$ )<br>graphite monochromated |
| Attenuator     | Zr foil (factor = 8.73)                                                    |

|                              |                                                                                                  |
|------------------------------|--------------------------------------------------------------------------------------------------|
| Temperature                  | -70.0 °C                                                                                         |
| Collimator Size              | 6.0 mm                                                                                           |
| Take-off Angle               | 6.0°                                                                                             |
| Detector Aperture            | 9.0 mm horizontal<br>13.0 mm vertical                                                            |
| Crystal to Detector Distance | 400 mm                                                                                           |
| Scan Type                    | $\omega$ - $2\theta$                                                                             |
| Scan Rate                    | 16.0°/min (in $\omega$ ) (up to 5 scans)                                                         |
| Scan Width                   | $(1.31 + 0.30 \tan \theta)^\circ$                                                                |
| $2\theta_{max}$              | 50.0°                                                                                            |
| No. of Reflections Measured  | Total: 16524<br>Unique: 0 ( $R_{int} = 0.026$ )                                                  |
| Corrections                  | Lorentz-polarization<br>Absorption<br>(trans. factors: 0.9247 - 0.9988)<br>Decay (0.47% decline) |

### C. Structure Solution and Refinement

|                                                                       |                                                                              |
|-----------------------------------------------------------------------|------------------------------------------------------------------------------|
| Structure Solution                                                    | Direct Methods (SIR92)                                                       |
| Refinement                                                            | Full-matrix least-squares                                                    |
| Function Minimized                                                    | $\Sigma w( Fo  -  Fc )^2$                                                    |
| Least Squares Weights                                                 | $w = \frac{1}{\sigma^2(F_o)} = [\sigma_c^2(F_o) + \frac{v^2}{4} F_o^2]^{-1}$ |
| p-factor                                                              | 0.1710                                                                       |
| Anomalous Dispersion                                                  | All non-hydrogen atoms                                                       |
| No. of Observations ( $I > 3.00\sigma(I)$ , $2\theta < 50.03^\circ$ ) | 5503                                                                         |
| No. Variables                                                         | 1034                                                                         |
| Reflection/Parameter Ratio                                            | 5.32                                                                         |
| Residuals: R; Rw                                                      | 0.082 ; 0.122                                                                |
| Residuals: R1                                                         | 0.082                                                                        |

|                                 |                          |
|---------------------------------|--------------------------|
| No. of Reflections to calc R1   | 5503                     |
| Goodness of Fit Indicator       | 1.31                     |
| Max Shift/Error in Final Cycle  | 0.011                    |
| Maximum peak in Final Diff. Map | $1.27 e^-/\text{\AA}^3$  |
| Minimum peak in Final Diff. Map | $-0.64 e^-/\text{\AA}^3$ |

Table 1. Atomic coordinates,  $B_{iso}/B_{eq}$  and occupancy

| atom  | x         | y          | z         | $B_{eq}$ | occ    |
|-------|-----------|------------|-----------|----------|--------|
| Mn(1) | 0.8382(1) | 0.19303(4) | 0.7328(1) | 2.68(4)  | 1.0000 |
| F(1)  | 1.0685    | 0.2357     | 0.5425    | 6.2131   | 0.5000 |
| F(2)  | 1.0118    | 0.2373     | 0.5031    | 5.4804   | 0.4700 |
| F(3)  | 0.9175    | 0.2559     | 0.5158    | 10.4081  | 0.6500 |
| F(4)  | 0.9476    | 0.2680     | 0.5755    | 6.2510   | 0.4800 |
| F(5)  | 1.0349    | 0.2632     | 0.6359    | 7.4464   | 0.4500 |
| F(6)  | 1.0839    | 0.2492     | 0.6347    | 6.1918   | 0.4500 |
| F(7)  | 1.0157    | 0.1374     | 0.5183    | 3.4204   | 0.3000 |
| F(8)  | 0.9463    | 0.1350     | 0.4825    | 5.2277   | 0.5000 |
| F(9)  | 0.8886    | 0.1320     | 0.4797    | 5.7394   | 0.2500 |
| F(10) | 0.8741    | 0.1129     | 0.5555    | 6.0481   | 0.8000 |
| F(11) | 0.9483    | 0.1084     | 0.5995    | 17.6761  | 0.3000 |
| F(12) | 1.0230    | 0.1179     | 0.6256    | 4.7864   | 0.5000 |
| F(13) | 1.0464    | 0.1259     | 0.5879    | 7.9138   | 0.3500 |
| F(14) | 0.7030    | 0.2724     | 0.8561    | 6.5605   | 0.3200 |
| F(15) | 0.6464    | 0.2692     | 0.8076    | 3.3367   | 0.3600 |
| F(16) | 0.5903    | 0.2562     | 0.7968    | 6.6426   | 0.4000 |
| F(17) | 0.5720    | 0.2450     | 0.8737    | 5.3477   | 0.4000 |
| F(18) | 0.6180    | 0.2406     | 0.9231    | 5.9083   | 0.5500 |
| F(19) | 0.7162    | 0.2534     | 0.9450    | 17.4242  | 0.3700 |
| F(20) | 0.7396    | 0.2628     | 0.9202    | 7.2727   | 0.6000 |
| F(21) | 0.6190    | 0.1195     | 0.7758    | 6.3860   | 0.3000 |
| F(22) | 0.6980    | 0.1138     | 0.8521    | 10.8992  | 0.7000 |
| F(23) | 0.7015    | 0.1277     | 0.9160    | 15.9351  | 0.4000 |

Table 1. Atomic coordinates,  $B_{iso}/B_{eq}$  and occupancy

| atom  | x         | y         | z         | $B_{eq}$ | occ    |
|-------|-----------|-----------|-----------|----------|--------|
| F(24) | 0.6100    | 0.1345    | 0.8947    | 5.2017   | 0.4000 |
| F(25) | 0.5549    | 0.1428    | 0.8563    | 4.5740   | 0.4000 |
| F(26) | 0.5536    | 0.1368    | 0.7612    | 17.6421  | 0.4000 |
| F(27) | 0.5850    | 0.1269    | 0.7465    | 5.1432   | 0.4000 |
| O(1)  | 1.3598(6) | 0.1424(2) | 1.5192(5) | 2.6(2)   | 1.0000 |
| O(2)  | 1.1798(5) | 0.1402(2) | 1.4472(4) | 2.3(2)   | 1.0000 |
| O(3)  | 0.9604(5) | 0.1281(2) | 1.1563(5) | 2.4(2)   | 1.0000 |
| O(4)  | 0.9913(6) | 0.1261(2) | 1.0232(5) | 2.6(2)   | 1.0000 |
| O(5)  | 1.2971(5) | 0.1287(2) | 0.9424(4) | 2.4(2)   | 1.0000 |
| O(6)  | 1.4789(5) | 0.1262(2) | 1.0092(5) | 2.6(2)   | 1.0000 |
| O(7)  | 1.6960(6) | 0.1313(2) | 1.3021(5) | 2.6(2)   | 1.0000 |
| O(8)  | 1.6649(5) | 0.1353(2) | 1.4372(5) | 2.6(2)   | 1.0000 |
| O(9)  | 0.9046(6) | 0.2229(2) | 0.6629(5) | 3.6(2)   | 1.0000 |
| O(10) | 0.8849(7) | 0.1588(2) | 0.6616(6) | 3.9(2)   | 1.0000 |
| O(11) | 0.7788(6) | 0.2235(2) | 0.8050(5) | 3.2(2)   | 1.0000 |
| O(12) | 0.7708(7) | 0.1599(2) | 0.7930(6) | 3.8(2)   | 1.0000 |
| O(13) | 1.321(1)  | 0.1862(2) | 1.2927(8) | 7.4(4)   | 1.0000 |
| O(14) | 1.3500(9) | 0.1879(2) | 1.1683(7) | 5.9(3)   | 1.0000 |
| O(15) | 1.3743    | 0.0063    | 1.2455    | 7.7(3)   | 1.0000 |
| O(16) | 1.3907    | -0.0414   | 1.2774    | 6.7(3)   | 1.0000 |
| O(17) | 1.3219    | 0.2509    | 1.3732    | 30.0(9)  | 1.0000 |
| O(18) | 1.2303    | 0.2921    | 1.2762    | 29.0(9)  | 1.0000 |
| N(1)  | 1.5330(8) | 0.2196(2) | 1.5416(7) | 3.5(3)   | 1.0000 |
| N(2)  | 1.6826(7) | 0.1944(2) | 1.6267(6) | 2.8(2)   | 1.0000 |

Table 1. Atomic coordinates,  $B_{iso}/B_{eq}$  and occupancy

| atom  | x          | y         | z         | $B_{eq}$ | occ    |
|-------|------------|-----------|-----------|----------|--------|
| N(3)  | 1.0074(8)  | 0.2157(2) | 1.3170(7) | 3.8(3)   | 1.0000 |
| N(4)  | 0.8650(8)  | 0.1865(2) | 1.3158(8) | 4.3(3)   | 1.0000 |
| N(5)  | 0.9887(7)  | 0.1866(2) | 0.8395(6) | 2.9(2)   | 1.0000 |
| N(6)  | 1.1438(8)  | 0.2096(2) | 0.9329(7) | 4.3(3)   | 1.0000 |
| N(7)  | 1.7646(10) | 0.1779(3) | 1.0828(9) | 5.7(4)   | 1.0000 |
| N(8)  | 1.6590(9)  | 0.2090(2) | 1.1321(8) | 4.6(3)   | 1.0000 |
| C(1)  | 1.5127(9)  | 0.1395(2) | 1.4773(7) | 2.5(3)   | 1.0000 |
| C(2)  | 1.5712(8)  | 0.1233(3) | 1.4353(7) | 2.3(3)   | 1.0000 |
| C(3)  | 1.5415(8)  | 0.0956(2) | 1.3984(7) | 2.0(3)   | 1.0000 |
| C(4)  | 1.4499(9)  | 0.0839(2) | 1.4038(7) | 2.5(3)   | 1.0000 |
| C(5)  | 1.3866(8)  | 0.0983(2) | 1.4427(7) | 2.2(3)   | 1.0000 |
| C(6)  | 1.4174(8)  | 0.1267(3) | 1.4772(7) | 2.3(3)   | 1.0000 |
| C(7)  | 1.2839(8)  | 0.0863(2) | 1.4467(7) | 2.1(3)   | 1.0000 |
| C(8)  | 1.2724(9)  | 0.1575(3) | 1.4654(8) | 2.8(3)   | 1.0000 |
| C(9)  | 1.1524(8)  | 0.1236(2) | 1.3702(7) | 2.3(3)   | 1.0000 |
| C(10) | 1.0730(8)  | 0.1350(2) | 1.3004(8) | 2.4(3)   | 1.0000 |
| C(11) | 1.0423(8)  | 0.1179(3) | 1.2253(8) | 2.5(3)   | 1.0000 |
| C(12) | 1.0897(8)  | 0.0909(2) | 1.2187(7) | 2.1(3)   | 1.0000 |
| C(13) | 1.1678(8)  | 0.0812(2) | 1.2905(7) | 2.2(3)   | 1.0000 |
| C(14) | 1.1998(8)  | 0.0968(2) | 1.3685(7) | 2.1(3)   | 1.0000 |
| C(15) | 1.0589(8)  | 0.0746(2) | 1.1316(7) | 2.4(3)   | 1.0000 |
| C(16) | 0.9844(8)  | 0.1442(2) | 1.0916(7) | 2.3(3)   | 1.0000 |
| C(17) | 1.0874(8)  | 0.1140(2) | 1.0306(7) | 2.3(3)   | 1.0000 |
| C(18) | 1.1487(8)  | 0.1281(2) | 0.9895(7) | 2.1(3)   | 1.0000 |

Table 1. Atomic coordinates,  $B_{iso}/B_{eq}$  and occupancy

| atom  | x          | y         | z          | $B_{eq}$ | occ    |
|-------|------------|-----------|------------|----------|--------|
| C(19) | 1.2420(8)  | 0.1155(3) | 0.9917(7)  | 2.6(3)   | 1.0000 |
| C(20) | 1.2752(8)  | 0.0887(2) | 1.0342(7)  | 2.2(3)   | 1.0000 |
| C(21) | 1.2154(8)  | 0.0759(2) | 1.0784(6)  | 1.9(2)   | 1.0000 |
| C(22) | 1.1207(8)  | 0.0883(3) | 1.0781(7)  | 2.4(3)   | 1.0000 |
| C(23) | 1.3778(8)  | 0.0747(2) | 1.0349(7)  | 2.0(3)   | 1.0000 |
| C(24) | 1.3893(9)  | 0.1447(3) | 0.9874(8)  | 3.0(3)   | 1.0000 |
| C(25) | 1.5100(8)  | 0.1142(2) | 1.0914(7)  | 2.3(3)   | 1.0000 |
| C(26) | 1.5872(8)  | 0.1289(2) | 1.1554(7)  | 2.3(3)   | 1.0000 |
| C(27) | 1.6164(8)  | 0.1167(2) | 1.2387(7)  | 2.2(3)   | 1.0000 |
| C(28) | 1.5720(8)  | 0.0907(2) | 1.2595(7)  | 2.1(3)   | 1.0000 |
| C(29) | 1.4956(8)  | 0.0767(2) | 1.1915(7)  | 2.2(3)   | 1.0000 |
| C(30) | 1.4623(8)  | 0.0885(3) | 1.1081(7)  | 2.2(3)   | 1.0000 |
| C(31) | 1.6064(8)  | 0.0796(2) | 1.3530(7)  | 2.0(3)   | 1.0000 |
| C(32) | 1.6675(9)  | 0.1499(2) | 1.3612(8)  | 2.9(3)   | 1.0000 |
| C(33) | 1.5507(8)  | 0.1677(2) | 1.5207(7)  | 2.4(3)   | 1.0000 |
| C(34) | 1.4981(9)  | 0.1944(3) | 1.5009(7)  | 3.0(3)   | 1.0000 |
| C(35) | 1.6235(9)  | 0.2184(3) | 1.6025(8)  | 3.0(3)   | 1.0000 |
| C(36) | 1.6446(9)  | 0.1691(3) | 1.5849(8)  | 2.9(3)   | 1.0000 |
| C(37) | 1.0167(8)  | 0.1626(3) | 1.3063(8)  | 2.6(3)   | 1.0000 |
| C(38) | 1.0604(9)  | 0.1899(3) | 1.3114(8)  | 3.1(3)   | 1.0000 |
| C(39) | 0.9141(10) | 0.2124(3) | 1.3196(10) | 4.2(4)   | 1.0000 |
| C(40) | 0.9168(9)  | 0.1622(3) | 1.3083(8)  | 3.2(3)   | 1.0000 |
| C(41) | 1.1123(9)  | 0.1570(2) | 0.9428(7)  | 2.4(3)   | 1.0000 |
| C(42) | 1.0199(9)  | 0.1604(3) | 0.8782(8)  | 3.0(3)   | 1.0000 |

Table 1. Atomic coordinates,  $B_{iso}/B_{eq}$  and occupancy

| atom  | x          | y          | z          | $B_{eq}$ | occ    |
|-------|------------|------------|------------|----------|--------|
| C(43) | 1.0540(10) | 0.2098(3)  | 0.8697(9)  | 3.7(3)   | 1.0000 |
| C(44) | 1.1721(9)  | 0.1827(3)  | 0.9679(8)  | 3.3(3)   | 1.0000 |
| C(45) | 1.6383(8)  | 0.1561(3)  | 1.1362(7)  | 2.5(3)   | 1.0000 |
| C(46) | 1.717(1)   | 0.1541(3)  | 1.1015(10) | 4.5(4)   | 1.0000 |
| C(47) | 1.732(1)   | 0.2039(3)  | 1.1025(9)  | 4.1(4)   | 1.0000 |
| C(48) | 1.613(1)   | 0.1840(3)  | 1.1499(10) | 4.3(4)   | 1.0000 |
| C(49) | 1.2840(8)  | 0.0522(2)  | 1.4610(7)  | 2.4(3)   | 1.0000 |
| C(50) | 1.3570(9)  | 0.0441(2)  | 1.5514(8)  | 2.7(3)   | 1.0000 |
| C(51) | 1.3253(9)  | 0.0573(3)  | 1.6236(8)  | 2.9(3)   | 1.0000 |
| C(52) | 1.382(1)   | 0.0808(3)  | 1.6705(9)  | 4.0(4)   | 1.0000 |
| C(53) | 1.355(1)   | 0.0933(3)  | 1.7384(10) | 5.0(4)   | 1.0000 |
| C(54) | 1.271(1)   | 0.0822(4)  | 1.7593(9)  | 5.3(4)   | 1.0000 |
| C(55) | 1.214(1)   | 0.0599(3)  | 1.7120(9)  | 4.6(4)   | 1.0000 |
| C(56) | 1.2410(10) | 0.0475(3)  | 1.6427(8)  | 3.5(3)   | 1.0000 |
| C(57) | 1.0679(9)  | 0.0407(2)  | 1.1402(7)  | 2.6(3)   | 1.0000 |
| C(58) | 0.9960(9)  | 0.0273(3)  | 1.1857(7)  | 2.8(3)   | 1.0000 |
| C(59) | 1.0104(8)  | -0.0059(3) | 1.1991(8)  | 2.8(3)   | 1.0000 |
| C(60) | 1.041(1)   | -0.0180(3) | 1.2815(9)  | 4.0(4)   | 1.0000 |
| C(61) | 1.056(1)   | -0.0484(3) | 1.2950(10) | 5.0(4)   | 1.0000 |
| C(62) | 1.039(1)   | -0.0675(3) | 1.225(1)   | 4.7(4)   | 1.0000 |
| C(63) | 1.008(1)   | -0.0558(3) | 1.1425(8)  | 4.2(4)   | 1.0000 |
| C(64) | 0.995(1)   | -0.0256(3) | 1.1275(8)  | 4.0(4)   | 1.0000 |
| C(65) | 1.3735(9)  | 0.0405(3)  | 1.0366(7)  | 2.8(3)   | 1.0000 |
| C(66) | 1.2934(9)  | 0.0273(3)  | 0.9578(7)  | 2.9(3)   | 1.0000 |

Table 1. Atomic coordinates,  $B_{iso}/B_{eq}$  and occupancy

| atom  | x          | y          | z          | $B_{eq}$ | occ    |
|-------|------------|------------|------------|----------|--------|
| C(67) | 1.2772(9)  | -0.0053(3) | 0.9650(7)  | 2.8(3)   | 1.0000 |
| C(68) | 1.2297(9)  | -0.0163(3) | 1.0218(7)  | 2.8(3)   | 1.0000 |
| C(69) | 1.216(1)   | -0.0466(3) | 1.0307(9)  | 4.1(4)   | 1.0000 |
| C(70) | 1.250(1)   | -0.0667(3) | 0.9827(10) | 4.9(4)   | 1.0000 |
| C(71) | 1.298(1)   | -0.0562(3) | 0.9270(10) | 4.9(4)   | 1.0000 |
| C(72) | 1.3141(9)  | -0.0258(3) | 0.9193(8)  | 3.2(3)   | 1.0000 |
| C(73) | 1.6072(8)  | 0.0454(2)  | 1.3607(7)  | 2.1(3)   | 1.0000 |
| C(74) | 1.6842(8)  | 0.0312(2)  | 1.3228(7)  | 2.5(3)   | 1.0000 |
| C(75) | 1.7954(9)  | 0.0410(2)  | 1.3684(8)  | 2.7(3)   | 1.0000 |
| C(76) | 1.8436(9)  | 0.0617(3)  | 1.3318(8)  | 3.1(3)   | 1.0000 |
| C(77) | 1.941(1)   | 0.0715(3)  | 1.3733(10) | 3.9(4)   | 1.0000 |
| C(78) | 1.9942(10) | 0.0602(3)  | 1.4541(9)  | 4.0(4)   | 1.0000 |
| C(79) | 1.9495(10) | 0.0386(3)  | 1.4887(8)  | 3.4(3)   | 1.0000 |
| C(80) | 1.8513(9)  | 0.0294(3)  | 1.4497(8)  | 2.8(3)   | 1.0000 |
| C(81) | 0.947(1)   | 0.2159(3)  | 0.6093(9)  | 4.0(4)   | 1.0000 |
| C(82) | 0.960(1)   | 0.1882(3)  | 0.5770(8)  | 4.5(4)   | 1.0000 |
| C(83) | 0.926(1)   | 0.1618(3)  | 0.6034(8)  | 3.7(3)   | 1.0000 |
| C(84) | 0.9947     | 0.2429     | 0.5762     | 5.3(3)   | 1.0000 |
| C(85) | 0.9499     | 0.1328     | 0.5641     | 5.7(4)   | 1.0000 |
| C(86) | 0.7073(10) | 0.2190(3)  | 0.8354(8)  | 3.5(3)   | 1.0000 |
| C(87) | 0.665(1)   | 0.1908(4)  | 0.8452(9)  | 5.0(4)   | 1.0000 |
| C(88) | 0.700(1)   | 0.1640(3)  | 0.8208(9)  | 4.5(4)   | 1.0000 |
| C(89) | 0.6625     | 0.2472     | 0.8637     | 6.4(4)   | 1.0000 |
| C(90) | 0.6388     | 0.1370     | 0.8307     | 10.3(6)  | 1.0000 |

Table 1. Atomic coordinates,  $B_{iso}/B_{eq}$  and occupancy

| atom   | x        | y         | z         | $B_{eq}$ | occ    |
|--------|----------|-----------|-----------|----------|--------|
| C(91)  | 1.333(1) | 0.1402(3) | 1.2244(9) | 4.5(4)   | 1.0000 |
| C(92)  | 1.334(1) | 0.1734(4) | 1.2309(9) | 4.4(4)   | 1.0000 |
| C(93)  | 1.342(2) | 0.2224(5) | 1.170(2)  | 11.4(9)  | 1.0000 |
| C(94)  | 1.361(2) | 0.2358(6) | 1.103(2)  | 14(1)    | 1.0000 |
| C(95)  | 1.4798   | -0.0239   | 1.1838    | 6.5(4)   | 1.0000 |
| C(96)  | 1.4106   | -0.0164   | 1.2369    | 6.1(4)   | 1.0000 |
| C(97)  | 1.3549   | -0.0408   | 1.3277    | 12.1(7)  | 1.0000 |
| C(98)  | 1.3213   | -0.0686   | 1.3743    | 7.4(5)   | 1.0000 |
| C(99)  | 1.3910   | 0.3025    | 1.3528    | 11.6(7)  | 1.0000 |
| C(100) | 1.3245   | 0.2819    | 1.3438    | 31.1(7)  | 1.0000 |
| C(101) | 1.2197   | 0.3302    | 1.2456    | 13.4(8)  | 1.0000 |
| C(102) | 1.2443   | 0.3331    | 1.1621    | 25.5(8)  | 1.0000 |
| H(1)   | 1.4259   | 0.0651    | 1.3779    | 2.6      | 1.0000 |
| H(2)   | 1.2728   | 0.0949    | 1.4967    | 2.8      | 1.0000 |
| H(3)   | 1.2654   | 0.1766    | 1.4910    | 3.1      | 1.0000 |
| H(4)   | 1.2848   | 0.1623    | 1.4111    | 3.1      | 1.0000 |
| H(5)   | 1.2017   | 0.0625    | 1.2882    | 3.1      | 1.0000 |
| H(6)   | 0.9852   | 0.0785    | 1.0999    | 2.7      | 1.0000 |
| H(7)   | 1.0506   | 0.1547    | 1.1158    | 3.2      | 1.0000 |
| H(8)   | 0.9347   | 0.1602    | 1.0678    | 3.2      | 1.0000 |
| H(9)   | 1.2418   | 0.0586    | 1.1132    | 2.2      | 1.0000 |
| H(10)  | 1.3887   | 0.0798    | 0.9806    | 2.4      | 1.0000 |
| H(11)  | 1.3817   | 0.1529    | 1.0389    | 3.7      | 1.0000 |
| H(12)  | 1.3966   | 0.1607    | 0.9513    | 3.7      | 1.0000 |

Table 1. Atomic coordinates,  $B_{iso}/B_{eq}$  and occupancy

| atom  | x      | y      | z      | $B_{eq}$ | occ    |
|-------|--------|--------|--------|----------|--------|
| H(13) | 1.4677 | 0.0578 | 1.1991 | 2.7      | 1.0000 |
| H(14) | 1.6795 | 0.0853 | 1.3812 | 2.6      | 1.0000 |
| H(15) | 1.7156 | 0.1667 | 1.3790 | 3.4      | 1.0000 |
| H(16) | 1.6006 | 0.1588 | 1.3349 | 3.4      | 1.0000 |
| H(17) | 1.4301 | 0.1935 | 1.4544 | 3.3      | 1.0000 |
| H(18) | 1.6503 | 0.2379 | 1.6336 | 3.7      | 1.0000 |
| H(19) | 1.6837 | 0.1498 | 1.6012 | 3.6      | 1.0000 |
| H(20) | 1.1309 | 0.1917 | 1.3076 | 3.9      | 1.0000 |
| H(21) | 0.8731 | 0.2304 | 1.3225 | 4.7      | 1.0000 |
| H(22) | 0.8793 | 0.1428 | 1.3052 | 4.0      | 1.0000 |
| H(23) | 0.9755 | 0.1428 | 0.8577 | 3.3      | 1.0000 |
| H(24) | 1.0303 | 0.2294 | 0.8420 | 4.4      | 1.0000 |
| H(25) | 1.2377 | 0.1808 | 1.0169 | 5.2      | 1.0000 |
| H(26) | 1.7424 | 0.1336 | 1.0920 | 4.8      | 1.0000 |
| H(27) | 1.7708 | 0.2216 | 1.0907 | 5.6      | 1.0000 |
| H(28) | 1.5505 | 0.1863 | 1.1661 | 5.3      | 1.0000 |
| H(29) | 1.3041 | 0.0414 | 1.4169 | 2.8      | 1.0000 |
| H(30) | 1.2167 | 0.0446 | 1.4577 | 2.8      | 1.0000 |
| H(31) | 1.4253 | 0.0506 | 1.5509 | 2.9      | 1.0000 |
| H(32) | 1.3611 | 0.0226 | 1.5554 | 2.9      | 1.0000 |
| H(33) | 1.4434 | 0.0884 | 1.6548 | 5.3      | 1.0000 |
| H(34) | 1.3991 | 0.1094 | 1.7731 | 6.4      | 1.0000 |
| H(35) | 1.2518 | 0.0932 | 1.8055 | 5.8      | 1.0000 |
| H(36) | 1.1516 | 0.0524 | 1.7254 | 5.5      | 1.0000 |

Table 1. Atomic coordinates,  $B_{iso}/B_{eq}$  and occupancy

| atom  | x      | y       | z      | $B_{eq}$ | occ    |
|-------|--------|---------|--------|----------|--------|
| H(37) | 1.1979 | 0.0310  | 1.6043 | 4.3      | 1.0000 |
| H(38) | 1.1373 | 0.0356  | 1.1695 | 2.9      | 1.0000 |
| H(39) | 1.0529 | 0.0318  | 1.0808 | 2.9      | 1.0000 |
| H(40) | 1.0043 | 0.0366  | 1.2384 | 4.3      | 1.0000 |
| H(41) | 0.9221 | 0.0310  | 1.1494 | 4.3      | 1.0000 |
| H(42) | 1.0511 | -0.0049 | 1.3296 | 4.4      | 1.0000 |
| H(43) | 1.0854 | -0.0572 | 1.3562 | 6.4      | 1.0000 |
| H(44) | 1.0509 | -0.0890 | 1.2324 | 5.1      | 1.0000 |
| H(45) | 0.9897 | -0.0691 | 1.0895 | 5.6      | 1.0000 |
| H(46) | 0.9719 | -0.0164 | 1.0655 | 5.8      | 1.0000 |
| H(47) | 1.3609 | 0.0338  | 1.0881 | 2.6      | 1.0000 |
| H(48) | 1.4411 | 0.0322  | 1.0392 | 2.6      | 1.0000 |
| H(49) | 1.2298 | 0.0377  | 0.9527 | 3.0      | 1.0000 |
| H(50) | 1.3130 | 0.0318  | 0.9087 | 3.0      | 1.0000 |
| H(51) | 1.2038 | -0.0022 | 1.0553 | 3.9      | 1.0000 |
| H(52) | 1.1801 | -0.0541 | 1.0700 | 5.4      | 1.0000 |
| H(53) | 1.2381 | -0.0890 | 0.9846 | 5.8      | 1.0000 |
| H(54) | 1.3267 | -0.0700 | 0.8929 | 4.8      | 1.0000 |
| H(55) | 1.3525 | -0.0192 | 0.8806 | 3.8      | 1.0000 |
| H(56) | 1.5380 | 0.0380  | 1.3345 | 3.3      | 1.0000 |
| H(57) | 1.6246 | 0.0396  | 1.4227 | 3.3      | 1.0000 |
| H(58) | 1.6636 | 0.0378  | 1.2638 | 3.4      | 1.0000 |
| H(59) | 1.6783 | 0.0104  | 1.3243 | 3.4      | 1.0000 |
| H(60) | 1.8075 | 0.0703  | 1.2749 | 3.9      | 1.0000 |

Table 1. Atomic coordinates,  $B_{iso}/B_{eq}$  and occupancy

| atom  | x      | y      | z      | $B_{eq}$ | occ    |
|-------|--------|--------|--------|----------|--------|
| H(61) | 1.9731 | 0.0869 | 1.3480 | 4.4      | 1.0000 |
| H(62) | 2.0656 | 0.0663 | 1.4855 | 4.3      | 1.0000 |
| H(63) | 1.9897 | 0.0300 | 1.5447 | 4.5      | 1.0000 |
| H(64) | 1.8185 | 0.0145 | 1.4770 | 3.4      | 1.0000 |
| H(65) | 0.9882 | 0.1872 | 0.5272 | 5.7      | 1.0000 |
| H(66) | 0.5991 | 0.1924 | 0.8659 | 6.7      | 1.0000 |

$$B_{eq} = \frac{8}{3}\pi^2(U_{11}(aa^*)^2 + U_{22}(bb^*)^2 + U_{33}(cc^*)^2 + 2U_{12}aa^*bb^* \cos \gamma + 2U_{13}aa^*cc^* \cos \beta + 2U_{23}bb^*cc^* \cos \alpha)$$

Table 2. Anisotropic Displacement Parameters

| atom  | $U_{11}$  | $U_{22}$ | $U_{33}$ | $U_{12}$   | $U_{13}$  | $U_{23}$  |
|-------|-----------|----------|----------|------------|-----------|-----------|
| Mn(1) | 0.034(1)  | 0.031(1) | 0.034(1) | -0.0001(9) | 0.0081(8) | 0.0005(9) |
| O(1)  | 0.037(5)  | 0.032(5) | 0.034(5) | 0.002(4)   | 0.014(4)  | -0.004(4) |
| O(2)  | 0.027(4)  | 0.032(5) | 0.026(4) | -0.001(3)  | 0.003(3)  | -0.005(4) |
| O(3)  | 0.026(4)  | 0.033(5) | 0.031(5) | 0.005(3)   | 0.006(4)  | 0.010(4)  |
| O(4)  | 0.036(5)  | 0.031(5) | 0.032(5) | 0.007(4)   | 0.010(4)  | 0.006(4)  |
| O(5)  | 0.034(4)  | 0.034(5) | 0.023(4) | -0.005(4)  | 0.012(4)  | 0.007(4)  |
| O(6)  | 0.028(4)  | 0.037(5) | 0.035(5) | -0.005(4)  | 0.009(4)  | 0.002(4)  |
| O(7)  | 0.033(4)  | 0.024(5) | 0.040(5) | 0.000(3)   | 0.011(4)  | -0.001(4) |
| O(8)  | 0.025(4)  | 0.043(5) | 0.026(5) | -0.009(4)  | 0.003(3)  | -0.001(4) |
| O(9)  | 0.052(6)  | 0.045(6) | 0.039(6) | -0.003(4)  | 0.012(4)  | 0.002(4)  |
| O(10) | 0.052(6)  | 0.051(6) | 0.048(6) | 0.005(4)   | 0.019(5)  | -0.004(5) |
| O(11) | 0.036(5)  | 0.041(5) | 0.048(6) | -0.006(4)  | 0.015(4)  | -0.001(4) |
| O(12) | 0.049(6)  | 0.044(6) | 0.052(6) | 0.000(4)   | 0.016(5)  | -0.001(5) |
| O(13) | 0.16(1)   | 0.058(8) | 0.074(9) | -0.005(7)  | 0.061(9)  | -0.010(6) |
| O(14) | 0.121(10) | 0.056(8) | 0.059(7) | -0.008(6)  | 0.047(7)  | 0.009(6)  |
| N(1)  | 0.056(7)  | 0.022(6) | 0.047(7) | 0.001(5)   | 0.006(6)  | -0.004(5) |
| N(2)  | 0.040(6)  | 0.025(6) | 0.037(6) | -0.005(5)  | 0.007(5)  | -0.010(5) |
| N(3)  | 0.050(7)  | 0.018(6) | 0.075(8) | 0.000(5)   | 0.019(6)  | -0.011(5) |
| N(4)  | 0.047(7)  | 0.045(8) | 0.079(9) | 0.021(6)   | 0.029(6)  | 0.005(6)  |
| N(5)  | 0.035(6)  | 0.035(7) | 0.034(6) | 0.007(5)   | 0.002(5)  | 0.004(5)  |
| N(6)  | 0.040(7)  | 0.033(7) | 0.071(8) | -0.001(5)  | -0.011(6) | 0.007(6)  |
| N(7)  | 0.076(9)  | 0.046(8) | 0.13(1)  | -0.005(7)  | 0.079(9)  | 0.015(8)  |
| N(8)  | 0.057(8)  | 0.037(7) | 0.10(1)  | 0.003(6)   | 0.046(8)  | 0.004(7)  |
| C(1)  | 0.044(7)  | 0.028(7) | 0.024(6) | 0.000(6)   | 0.012(5)  | -0.003(5) |

Table 2. Anisotropic Displacement Parameters (continued)

| atom  | $U_{11}$ | $U_{22}$ | $U_{33}$ | $U_{12}$  | $U_{13}$  | $U_{23}$  |
|-------|----------|----------|----------|-----------|-----------|-----------|
| C(2)  | 0.024(6) | 0.031(7) | 0.028(7) | -0.007(5) | 0.005(5)  | -0.006(5) |
| C(3)  | 0.032(7) | 0.019(7) | 0.026(7) | 0.003(5)  | 0.010(5)  | 0.000(5)  |
| C(4)  | 0.035(7) | 0.026(7) | 0.034(7) | -0.002(5) | 0.009(5)  | 0.004(5)  |
| C(5)  | 0.034(7) | 0.022(7) | 0.023(6) | 0.009(5)  | 0.005(5)  | -0.001(5) |
| C(6)  | 0.035(7) | 0.033(7) | 0.022(6) | 0.001(5)  | 0.011(5)  | -0.004(5) |
| C(7)  | 0.018(6) | 0.032(7) | 0.029(7) | -0.005(5) | 0.009(5)  | -0.001(5) |
| C(8)  | 0.034(7) | 0.025(7) | 0.046(8) | 0.013(5)  | 0.009(6)  | 0.002(6)  |
| C(9)  | 0.034(7) | 0.029(7) | 0.024(6) | -0.012(5) | 0.010(5)  | -0.005(5) |
| C(10) | 0.027(6) | 0.027(7) | 0.037(7) | -0.006(5) | 0.008(5)  | 0.000(6)  |
| C(11) | 0.020(6) | 0.037(8) | 0.038(8) | 0.003(5)  | 0.010(5)  | 0.004(6)  |
| C(12) | 0.025(6) | 0.034(7) | 0.024(6) | 0.002(5)  | 0.015(5)  | 0.001(5)  |
| C(13) | 0.027(6) | 0.017(6) | 0.046(8) | 0.003(5)  | 0.018(6)  | 0.005(5)  |
| C(14) | 0.022(6) | 0.029(7) | 0.032(7) | -0.002(5) | 0.011(5)  | 0.001(6)  |
| C(15) | 0.030(7) | 0.031(7) | 0.027(7) | -0.003(5) | 0.006(5)  | 0.002(5)  |
| C(16) | 0.042(7) | 0.017(6) | 0.033(7) | 0.010(5)  | 0.018(6)  | 0.006(5)  |
| C(17) | 0.031(7) | 0.028(7) | 0.025(7) | 0.001(5)  | 0.004(5)  | -0.008(5) |
| C(18) | 0.026(6) | 0.026(7) | 0.032(7) | 0.003(5)  | 0.013(5)  | -0.004(5) |
| C(19) | 0.026(6) | 0.034(8) | 0.031(7) | -0.004(5) | -0.003(5) | 0.009(6)  |
| C(20) | 0.021(6) | 0.030(7) | 0.034(7) | 0.007(5)  | 0.010(5)  | 0.012(6)  |
| C(21) | 0.026(6) | 0.025(6) | 0.017(6) | -0.002(5) | 0.001(5)  | 0.000(5)  |
| C(22) | 0.037(7) | 0.035(7) | 0.015(6) | -0.001(5) | 0.002(5)  | -0.001(5) |
| C(23) | 0.040(7) | 0.013(6) | 0.024(6) | -0.005(5) | 0.014(5)  | -0.008(5) |
| C(24) | 0.034(7) | 0.023(7) | 0.054(9) | 0.005(5)  | 0.013(6)  | 0.015(6)  |
| C(25) | 0.031(7) | 0.031(7) | 0.033(7) | 0.007(5)  | 0.018(5)  | 0.011(6)  |

Table 2. Anisotropic Displacement Parameters (continued)

| atom  | $U_{11}$ | $U_{22}$ | $U_{33}$  | $U_{12}$  | $U_{13}$  | $U_{23}$  |
|-------|----------|----------|-----------|-----------|-----------|-----------|
| C(26) | 0.024(6) | 0.028(7) | 0.036(7)  | 0.006(5)  | 0.013(5)  | -0.003(6) |
| C(27) | 0.024(6) | 0.029(7) | 0.030(7)  | 0.010(5)  | 0.007(5)  | 0.009(6)  |
| C(28) | 0.027(6) | 0.033(7) | 0.021(6)  | -0.006(5) | 0.008(5)  | -0.003(5) |
| C(29) | 0.029(6) | 0.015(6) | 0.039(8)  | 0.001(5)  | 0.011(5)  | -0.001(5) |
| C(30) | 0.023(6) | 0.034(7) | 0.023(6)  | 0.007(5)  | 0.005(5)  | 0.004(5)  |
| C(31) | 0.025(6) | 0.028(7) | 0.026(6)  | -0.002(5) | 0.009(5)  | 0.001(5)  |
| C(32) | 0.037(7) | 0.027(7) | 0.048(8)  | -0.001(5) | 0.017(6)  | -0.002(6) |
| C(33) | 0.025(6) | 0.026(7) | 0.039(8)  | 0.003(5)  | 0.011(5)  | -0.004(6) |
| C(34) | 0.047(7) | 0.041(8) | 0.017(6)  | -0.003(6) | -0.002(5) | 0.009(6)  |
| C(35) | 0.035(7) | 0.027(7) | 0.041(8)  | 0.003(6)  | -0.003(6) | -0.005(6) |
| C(36) | 0.046(8) | 0.037(8) | 0.031(7)  | 0.008(6)  | 0.016(6)  | 0.004(6)  |
| C(37) | 0.025(6) | 0.027(7) | 0.048(8)  | -0.005(5) | 0.012(6)  | -0.010(6) |
| C(38) | 0.042(7) | 0.026(7) | 0.049(8)  | 0.003(6)  | 0.014(6)  | 0.000(6)  |
| C(39) | 0.034(8) | 0.021(8) | 0.10(1)   | 0.007(6)  | 0.020(8)  | -0.005(7) |
| C(40) | 0.035(7) | 0.029(8) | 0.064(9)  | 0.002(6)  | 0.024(7)  | -0.007(6) |
| C(41) | 0.035(7) | 0.025(7) | 0.030(7)  | 0.000(5)  | 0.009(5)  | -0.003(6) |
| C(42) | 0.044(8) | 0.031(7) | 0.035(8)  | 0.009(6)  | 0.005(6)  | 0.008(6)  |
| C(43) | 0.046(8) | 0.029(8) | 0.065(10) | 0.010(6)  | 0.015(7)  | 0.023(7)  |
| C(44) | 0.035(7) | 0.028(7) | 0.051(9)  | 0.007(6)  | -0.004(6) | 0.003(6)  |
| C(45) | 0.030(7) | 0.027(7) | 0.037(7)  | -0.004(5) | 0.010(5)  | 0.005(6)  |
| C(46) | 0.061(9) | 0.031(8) | 0.09(1)   | 0.005(7)  | 0.048(9)  | 0.005(8)  |
| C(47) | 0.055(9) | 0.026(8) | 0.08(1)   | -0.005(7) | 0.023(8)  | 0.022(7)  |
| C(48) | 0.053(8) | 0.038(9) | 0.09(1)   | -0.001(7) | 0.058(9)  | 0.009(8)  |
| C(49) | 0.033(7) | 0.025(7) | 0.036(7)  | -0.002(5) | 0.016(5)  | 0.003(5)  |

Table 2. Anisotropic Displacement Parameters (continued)

| atom  | $U_{11}$  | $U_{22}$  | $U_{33}$  | $U_{12}$  | $U_{13}$  | $U_{23}$  |
|-------|-----------|-----------|-----------|-----------|-----------|-----------|
| C(50) | 0.046(7)  | 0.021(7)  | 0.039(8)  | 0.003(5)  | 0.021(6)  | 0.007(6)  |
| C(51) | 0.039(7)  | 0.030(7)  | 0.033(8)  | -0.001(6) | -0.001(6) | 0.008(6)  |
| C(52) | 0.057(9)  | 0.049(9)  | 0.039(9)  | -0.005(7) | 0.008(7)  | 0.009(7)  |
| C(53) | 0.08(1)   | 0.049(10) | 0.06(1)   | -0.017(8) | 0.006(9)  | -0.002(8) |
| C(54) | 0.08(1)   | 0.07(1)   | 0.043(10) | 0.009(9)  | 0.004(8)  | -0.018(8) |
| C(55) | 0.045(9)  | 0.08(1)   | 0.055(10) | 0.000(8)  | 0.021(7)  | -0.010(9) |
| C(56) | 0.046(8)  | 0.039(8)  | 0.047(8)  | 0.012(6)  | 0.016(7)  | -0.003(6) |
| C(57) | 0.041(7)  | 0.030(7)  | 0.031(7)  | 0.005(5)  | 0.015(6)  | 0.007(6)  |
| C(58) | 0.039(7)  | 0.038(8)  | 0.030(7)  | -0.007(6) | 0.011(6)  | -0.009(6) |
| C(59) | 0.021(6)  | 0.048(8)  | 0.041(8)  | -0.004(5) | 0.016(6)  | 0.003(6)  |
| C(60) | 0.07(1)   | 0.037(8)  | 0.046(9)  | 0.003(7)  | 0.025(8)  | -0.003(7) |
| C(61) | 0.09(1)   | 0.05(1)   | 0.06(1)   | 0.007(8)  | 0.039(9)  | 0.012(8)  |
| C(62) | 0.07(1)   | 0.039(9)  | 0.07(1)   | 0.010(8)  | 0.029(9)  | 0.010(8)  |
| C(63) | 0.08(1)   | 0.038(9)  | 0.032(8)  | -0.009(7) | -0.003(7) | -0.019(7) |
| C(64) | 0.070(10) | 0.036(9)  | 0.040(8)  | -0.008(7) | 0.007(7)  | -0.010(7) |
| C(65) | 0.043(8)  | 0.029(7)  | 0.037(8)  | 0.000(6)  | 0.015(6)  | 0.003(6)  |
| C(66) | 0.055(8)  | 0.025(7)  | 0.033(7)  | -0.011(6) | 0.020(6)  | -0.004(6) |
| C(67) | 0.041(7)  | 0.029(7)  | 0.028(7)  | -0.001(5) | 0.003(6)  | 0.002(6)  |
| C(68) | 0.048(8)  | 0.031(8)  | 0.024(7)  | 0.005(6)  | 0.006(6)  | -0.010(5) |
| C(69) | 0.059(9)  | 0.036(9)  | 0.07(1)   | -0.015(7) | 0.030(8)  | -0.002(8) |
| C(70) | 0.08(1)   | 0.044(10) | 0.048(10) | -0.004(8) | 0.008(9)  | 0.009(8)  |
| C(71) | 0.063(10) | 0.045(10) | 0.07(1)   | 0.013(8)  | 0.004(8)  | -0.030(8) |
| C(72) | 0.037(7)  | 0.043(9)  | 0.041(8)  | 0.003(6)  | 0.010(6)  | -0.018(7) |
| C(73) | 0.031(6)  | 0.019(6)  | 0.030(7)  | -0.001(5) | 0.007(5)  | 0.001(5)  |

Table 2. Anisotropic Displacement Parameters (continued)

| atom  | U <sub>11</sub> | U <sub>22</sub> | U <sub>33</sub> | U <sub>12</sub> | U <sub>13</sub> | U <sub>23</sub> |
|-------|-----------------|-----------------|-----------------|-----------------|-----------------|-----------------|
| C(74) | 0.033(7)        | 0.033(7)        | 0.028(7)        | 0.008(5)        | 0.009(5)        | 0.004(5)        |
| C(75) | 0.054(8)        | 0.014(6)        | 0.045(8)        | 0.005(5)        | 0.028(7)        | 0.003(6)        |
| C(76) | 0.044(8)        | 0.033(8)        | 0.043(8)        | 0.004(6)        | 0.020(6)        | 0.010(6)        |
| C(77) | 0.046(9)        | 0.039(9)        | 0.07(1)         | -0.003(6)       | 0.031(8)        | 0.009(7)        |
| C(78) | 0.043(8)        | 0.052(10)       | 0.056(10)       | 0.001(7)        | 0.014(7)        | -0.011(8)       |
| C(79) | 0.048(9)        | 0.036(8)        | 0.044(8)        | 0.010(6)        | 0.015(7)        | 0.005(6)        |
| C(80) | 0.040(8)        | 0.039(8)        | 0.031(7)        | -0.002(6)       | 0.018(6)        | 0.003(6)        |
| C(81) | 0.062(9)        | 0.053(10)       | 0.036(8)        | 0.002(7)        | 0.015(7)        | -0.008(7)       |
| C(82) | 0.09(1)         | 0.05(1)         | 0.039(9)        | 0.012(8)        | 0.042(8)        | 0.005(7)        |
| C(83) | 0.067(10)       | 0.039(9)        | 0.030(8)        | 0.008(7)        | 0.008(7)        | -0.002(6)       |
| C(86) | 0.035(7)        | 0.07(1)         | 0.035(8)        | -0.003(7)       | 0.014(6)        | -0.009(7)       |
| C(87) | 0.08(1)         | 0.07(1)         | 0.06(1)         | -0.027(9)       | 0.045(9)        | -0.001(9)       |
| C(88) | 0.08(1)         | 0.039(9)        | 0.049(10)       | -0.029(8)       | 0.019(9)        | -0.001(7)       |
| C(91) | 0.063(9)        | 0.031(8)        | 0.07(1)         | -0.002(7)       | 0.011(8)        | 0.014(8)        |
| C(92) | 0.069(10)       | 0.07(1)         | 0.021(7)        | 0.001(9)        | 0.004(6)        | -0.005(8)       |
| C(93) | 0.27(3)         | 0.06(2)         | 0.13(2)         | 0.00(2)         | 0.10(2)         | -0.01(1)        |
| C(94) | 0.24(3)         | 0.19(3)         | 0.12(2)         | -0.10(2)        | 0.07(2)         | 0.03(2)         |

The general temperature factor expression:

$$\exp(-2\pi^2(a^{*2}U_{11}h^2 + b^{*2}U_{22}k^2 + c^{*2}U_{33}l^2 + 2a^*b^*U_{12}hk + 2a^*c^*U_{13}hl + 2b^*c^*U_{23}kl))$$

Table 3. Bond Lengths( $\text{\AA}$ )

| atom  | atom               | distance  | atom  | atom  | distance  |
|-------|--------------------|-----------|-------|-------|-----------|
| Mn(1) | O(9)               | 2.142(8)  | Mn(1) | O(10) | 2.143(9)  |
| Mn(1) | O(11)              | 2.130(8)  | Mn(1) | O(12) | 2.148(9)  |
| Mn(1) | N(2) <sup>1)</sup> | 2.282(10) | Mn(1) | N(5)  | 2.257(9)  |
| F(1)  | F(2)               | 0.8400(2) | F(1)  | F(6)  | 1.58      |
| F(1)  | C(84)              | 1.3342(3) | F(2)  | F(3)  | 1.6041(3) |
| F(2)  | C(84)              | 1.31      | F(3)  | F(4)  | 1.08      |
| F(3)  | C(84)              | 1.3303(2) | F(4)  | F(5)  | 1.3047(2) |
| F(4)  | C(84)              | 1.2990(1) | F(5)  | F(6)  | 0.9260(2) |
| F(5)  | C(84)              | 1.32      | F(6)  | C(84) | 1.3211(3) |
| F(7)  | F(8)               | 0.9507(2) | F(7)  | F(9)  | 1.6688(5) |
| F(7)  | F(13)              | 1.20      | F(7)  | C(85) | 1.3584(2) |
| F(8)  | F(9)               | 0.7871(2) | F(8)  | C(85) | 1.32      |
| F(9)  | F(10)              | 1.57      | F(9)  | C(85) | 1.3701(1) |
| F(10) | F(11)              | 1.0614(2) | F(10) | C(85) | 1.3417(2) |
| F(11) | F(12)              | 1.0665(3) | F(11) | F(13) | 1.6214(4) |
| F(11) | C(85)              | 1.25      | F(12) | F(13) | 0.8584(1) |
| F(12) | C(85)              | 1.3498(2) | F(13) | C(85) | 1.2917(4) |
| F(14) | F(15)              | 0.9261(1) | F(14) | F(16) | 1.7021(3) |
| F(14) | F(19)              | 1.65      | F(14) | F(20) | 1.10      |
| F(14) | C(89)              | 1.2857(1) | F(15) | F(16) | 0.9362(2) |
| F(15) | C(89)              | 1.32      | F(16) | F(17) | 1.45      |
| F(16) | C(89)              | 1.2864(2) | F(17) | F(18) | 0.8750(1) |
| F(17) | C(89)              | 1.3040(4) | F(18) | F(19) | 1.3996(4) |
| F(18) | C(89)              | 1.3325(1) | F(19) | F(20) | 0.7262(1) |

Table 3. Bond Lengths( $\text{\AA}$ ) (continued)

| atom  | atom   | distance  | atom  | atom   | distance  |
|-------|--------|-----------|-------|--------|-----------|
| F(19) | C(89)  | 1.3289(1) | F(20) | C(89)  | 1.3573(2) |
| F(21) | F(22)  | 1.3912(2) | F(21) | F(26)  | 1.1523(2) |
| F(21) | F(27)  | 0.6452(1) | F(21) | C(90)  | 1.16      |
| F(22) | F(23)  | 1.20      | F(22) | C(90)  | 1.2977(1) |
| F(23) | F(24)  | 1.2281(4) | F(23) | C(90)  | 1.4496(1) |
| F(24) | F(25)  | 0.8946(1) | F(24) | C(90)  | 1.2368(1) |
| F(25) | F(26)  | 1.57      | F(25) | C(90)  | 1.3661(3) |
| F(26) | F(27)  | 0.7115(1) | F(26) | C(90)  | 1.3460(2) |
| F(27) | C(90)  | 1.41      | O(1)  | C(6)   | 1.39(1)   |
| O(1)  | C(8)   | 1.41(1)   | O(2)  | C(8)   | 1.44(1)   |
| O(2)  | C(9)   | 1.41(1)   | O(3)  | C(11)  | 1.39(1)   |
| O(3)  | C(16)  | 1.40(1)   | O(4)  | C(16)  | 1.41(1)   |
| O(4)  | C(17)  | 1.39(1)   | O(5)  | C(19)  | 1.40(1)   |
| O(5)  | C(24)  | 1.44(1)   | O(6)  | C(24)  | 1.43(1)   |
| O(6)  | C(25)  | 1.39(1)   | O(7)  | C(27)  | 1.41(1)   |
| O(7)  | C(32)  | 1.42(1)   | O(8)  | C(2)   | 1.38(1)   |
| O(8)  | C(32)  | 1.42(1)   | O(9)  | C(81)  | 1.24(1)   |
| O(10) | C(83)  | 1.26(1)   | O(11) | C(86)  | 1.25(1)   |
| O(12) | C(88)  | 1.21(2)   | O(13) | C(92)  | 1.22(2)   |
| O(14) | C(92)  | 1.29(2)   | O(14) | C(93)  | 1.56(2)   |
| O(15) | C(96)  | 1.1653(1) | O(16) | C(96)  | 1.37      |
| O(16) | C(97)  | 1.0838(1) | O(17) | C(100) | 1.48      |
| O(18) | C(100) | 1.4817(3) | O(18) | C(101) | 1.77      |
| N(1)  | C(34)  | 1.33(1)   | N(1)  | C(35)  | 1.32(1)   |

Table 3. Bond Lengths( $\text{\AA}$ ) (continued)

| atom  | atom  | distance | atom  | atom  | distance |
|-------|-------|----------|-------|-------|----------|
| N(2)  | C(35) | 1.33(1)  | N(2)  | C(36) | 1.34(1)  |
| N(3)  | C(38) | 1.39(1)  | N(3)  | C(39) | 1.30(2)  |
| N(4)  | C(39) | 1.33(2)  | N(4)  | C(40) | 1.33(1)  |
| N(5)  | C(42) | 1.34(1)  | N(5)  | C(43) | 1.36(1)  |
| N(6)  | C(43) | 1.33(2)  | N(6)  | C(44) | 1.34(1)  |
| N(7)  | C(46) | 1.34(2)  | N(7)  | C(47) | 1.33(2)  |
| N(8)  | C(47) | 1.26(2)  | N(8)  | C(48) | 1.36(1)  |
| C(1)  | C(2)  | 1.41(1)  | C(1)  | C(6)  | 1.42(2)  |
| C(1)  | C(33) | 1.47(1)  | C(2)  | C(3)  | 1.39(1)  |
| C(3)  | C(4)  | 1.39(1)  | C(3)  | C(31) | 1.51(1)  |
| C(4)  | C(5)  | 1.39(1)  | C(4)  | H(1)  | 0.96     |
| C(5)  | C(6)  | 1.41(1)  | C(5)  | C(7)  | 1.53(1)  |
| C(7)  | C(14) | 1.50(1)  | C(7)  | C(49) | 1.55(1)  |
| C(7)  | H(2)  | 0.96     | C(8)  | H(3)  | 0.97     |
| C(8)  | H(4)  | 0.98     | C(9)  | C(10) | 1.40(1)  |
| C(9)  | C(14) | 1.37(1)  | C(10) | C(11) | 1.40(2)  |
| C(10) | C(37) | 1.48(1)  | C(11) | C(12) | 1.39(1)  |
| C(12) | C(13) | 1.38(1)  | C(12) | C(15) | 1.54(1)  |
| C(13) | C(14) | 1.40(1)  | C(13) | H(5)  | 0.97     |
| C(15) | C(22) | 1.53(2)  | C(15) | C(57) | 1.53(2)  |
| C(15) | H(6)  | 0.99     | C(16) | H(7)  | 0.99     |
| C(16) | H(8)  | 0.98     | C(17) | C(18) | 1.39(2)  |
| C(17) | C(22) | 1.38(1)  | C(18) | C(19) | 1.39(1)  |
| C(18) | C(41) | 1.51(1)  | C(19) | C(20) | 1.39(1)  |

Table 3. Bond Lengths( $\text{\AA}$ ) (continued)

| atom  | atom  | distance | atom  | atom  | distance |
|-------|-------|----------|-------|-------|----------|
| C(20) | C(21) | 1.38(1)  | C(20) | C(23) | 1.54(1)  |
| C(21) | C(22) | 1.41(1)  | C(21) | H(9)  | 0.97     |
| C(23) | C(30) | 1.51(1)  | C(23) | C(65) | 1.54(1)  |
| C(23) | H(10) | 0.97     | C(24) | H(11) | 0.95     |
| C(24) | H(12) | 0.95     | C(25) | C(26) | 1.40(1)  |
| C(25) | C(30) | 1.39(1)  | C(26) | C(27) | 1.40(1)  |
| C(26) | C(45) | 1.49(1)  | C(27) | C(28) | 1.40(1)  |
| C(28) | C(29) | 1.41(1)  | C(28) | C(31) | 1.53(1)  |
| C(29) | C(30) | 1.40(1)  | C(29) | H(13) | 0.95     |
| C(31) | C(73) | 1.54(1)  | C(31) | H(14) | 0.99     |
| C(32) | H(15) | 0.99     | C(32) | H(16) | 0.97     |
| C(33) | C(34) | 1.38(2)  | C(33) | C(36) | 1.38(2)  |
| C(34) | H(17) | 1.00     | C(35) | H(18) | 1.02     |
| C(36) | H(19) | 1.01     | C(37) | C(38) | 1.36(1)  |
| C(37) | C(40) | 1.38(1)  | C(38) | H(20) | 0.99     |
| C(39) | H(21) | 0.99     | C(40) | H(22) | 1.00     |
| C(41) | C(42) | 1.37(2)  | C(41) | C(44) | 1.40(2)  |
| C(42) | H(23) | 0.99     | C(43) | H(24) | 0.99     |
| C(44) | H(25) | 1.00     | C(45) | C(46) | 1.37(2)  |
| C(45) | C(48) | 1.34(2)  | C(46) | H(26) | 1.01     |
| C(47) | H(27) | 1.01     | C(48) | H(28) | 0.98     |
| C(49) | C(50) | 1.54(2)  | C(49) | H(29) | 0.98     |
| C(49) | H(30) | 0.97     | C(50) | C(51) | 1.50(2)  |
| C(50) | H(31) | 0.98     | C(50) | H(32) | 0.97     |

Table 3. Bond Lengths( $\text{\AA}$ ) (continued)

| atom  | atom  | distance | atom  | atom  | distance |
|-------|-------|----------|-------|-------|----------|
| C(51) | C(52) | 1.39(2)  | C(51) | C(56) | 1.36(2)  |
| C(52) | C(53) | 1.39(2)  | C(52) | H(33) | 1.01     |
| C(53) | C(54) | 1.40(2)  | C(53) | H(34) | 0.99     |
| C(54) | C(55) | 1.35(2)  | C(54) | H(35) | 1.01     |
| C(55) | C(56) | 1.41(2)  | C(55) | H(36) | 1.01     |
| C(56) | H(37) | 1.03     | C(57) | C(58) | 1.53(2)  |
| C(57) | H(38) | 0.95     | C(57) | H(39) | 1.01     |
| C(58) | C(59) | 1.51(2)  | C(58) | H(40) | 0.93     |
| C(58) | H(41) | 1.01     | C(59) | C(60) | 1.39(2)  |
| C(59) | C(64) | 1.43(2)  | C(60) | C(61) | 1.39(2)  |
| C(60) | H(42) | 0.96     | C(61) | C(62) | 1.39(2)  |
| C(61) | H(43) | 1.03     | C(62) | C(63) | 1.39(2)  |
| C(62) | H(44) | 0.98     | C(63) | C(64) | 1.38(2)  |
| C(63) | H(45) | 1.02     | C(64) | H(46) | 1.05     |
| C(65) | C(66) | 1.52(2)  | C(65) | H(47) | 0.96     |
| C(65) | H(48) | 0.99     | C(66) | C(67) | 1.49(2)  |
| C(66) | H(49) | 0.97     | C(66) | H(50) | 0.94     |
| C(67) | C(68) | 1.38(2)  | C(67) | C(72) | 1.38(2)  |
| C(68) | C(69) | 1.39(2)  | C(68) | H(51) | 0.98     |
| C(69) | C(70) | 1.37(2)  | C(69) | H(52) | 0.99     |
| C(70) | C(71) | 1.37(2)  | C(70) | H(53) | 1.02     |
| C(71) | C(72) | 1.39(2)  | C(71) | H(54) | 0.99     |
| C(72) | H(55) | 0.99     | C(73) | C(74) | 1.52(1)  |
| C(73) | H(56) | 0.97     | C(73) | H(57) | 1.00     |

Table 3. Bond Lengths( $\text{\AA}$ ) (continued)

| atom  | atom   | distance  | atom   | atom   | distance  |
|-------|--------|-----------|--------|--------|-----------|
| C(74) | C(75)  | 1.53(2)   | C(74)  | H(58)  | 0.96      |
| C(74) | H(59)  | 0.94      | C(75)  | C(76)  | 1.38(2)   |
| C(75) | C(80)  | 1.41(2)   | C(76)  | C(77)  | 1.36(2)   |
| C(76) | H(60)  | 0.98      | C(77)  | C(78)  | 1.39(2)   |
| C(77) | H(61)  | 0.98      | C(78)  | C(79)  | 1.36(2)   |
| C(78) | H(62)  | 0.99      | C(79)  | C(80)  | 1.36(2)   |
| C(79) | H(63)  | 0.98      | C(80)  | H(64)  | 0.99      |
| C(81) | C(82)  | 1.39(2)   | C(81)  | C(84)  | 1.55(1)   |
| C(82) | C(83)  | 1.39(2)   | C(82)  | H(65)  | 1.01      |
| C(83) | C(85)  | 1.53(1)   | C(86)  | C(87)  | 1.43(2)   |
| C(86) | C(89)  | 1.54(1)   | C(87)  | C(88)  | 1.40(2)   |
| C(87) | H(66)  | 1.06      | C(88)  | C(90)  | 1.51(1)   |
| C(91) | C(92)  | 1.49(2)   | C(93)  | C(94)  | 1.36(3)   |
| C(95) | C(96)  | 1.5124(2) | C(97)  | C(98)  | 1.6034(1) |
| C(99) | C(100) | 1.2735(2) | C(101) | C(102) | 1.5106(1) |

Symmetry operations

- (1) X-1,Y,Z-1

Table 4. Bond Angles(°)

| atom               | atom  | atom               | angle      | atom  | atom  | atom               | angle      |
|--------------------|-------|--------------------|------------|-------|-------|--------------------|------------|
| O(9)               | Mn(1) | O(10)              | 84.8(3)    | O(9)  | Mn(1) | O(11)              | 101.2(3)   |
| O(9)               | Mn(1) | O(12)              | 174.3(3)   | O(9)  | Mn(1) | N(2) <sup>1)</sup> | 91.7(3)    |
| O(9)               | Mn(1) | N(5)               | 93.2(3)    | O(10) | Mn(1) | O(11)              | 173.4(3)   |
| O(10)              | Mn(1) | O(12)              | 89.9(3)    | O(10) | Mn(1) | N(2) <sup>1)</sup> | 88.5(3)    |
| O(10)              | Mn(1) | N(5)               | 88.4(3)    | O(11) | Mn(1) | O(12)              | 84.0(3)    |
| O(11)              | Mn(1) | N(2) <sup>1)</sup> | 88.6(3)    | O(11) | Mn(1) | N(5)               | 94.0(3)    |
| O(12)              | Mn(1) | N(2) <sup>1)</sup> | 86.2(3)    | O(12) | Mn(1) | N(5)               | 88.6(3)    |
| N(2) <sup>1)</sup> | Mn(1) | N(5)               | 173.9(4)   | F(2)  | F(1)  | F(6)               | 120.808(8) |
| F(2)               | F(1)  | C(84)              | 70.12(2)   | F(6)  | F(1)  | C(84)              | 53.231(8)  |
| F(1)               | F(2)  | F(3)               | 122.04(1)  | F(1)  | F(2)  | C(84)              | 72.89(1)   |
| F(3)               | F(2)  | C(84)              | 53.132(2)  | F(2)  | F(3)  | F(4)               | 106.73(1)  |
| F(2)               | F(3)  | C(84)              | 52.139(10) | F(4)  | F(3)  | C(84)              | 64.262(2)  |
| F(3)               | F(4)  | F(5)               | 126.614(1) | F(3)  | F(4)  | C(84)              | 67.294(7)  |
| F(5)               | F(4)  | C(84)              | 61.086(7)  | F(4)  | F(5)  | F(6)               | 126.31(1)  |
| F(4)               | F(5)  | C(84)              | 59.244(2)  | F(6)  | F(5)  | C(84)              | 69.38(1)   |
| F(1)               | F(6)  | F(5)               | 113.828(4) | F(1)  | F(6)  | C(84)              | 54.001(9)  |
| F(5)               | F(6)  | C(84)              | 69.62(1)   | F(8)  | F(7)  | F(9)               | 14.710(4)  |
| F(8)               | F(7)  | F(13)              | 121.090(2) | F(8)  | F(7)  | C(85)              | 67.32(2)   |
| F(9)               | F(7)  | F(13)              | 107.843(1) | F(9)  | F(7)  | C(85)              | 52.61(1)   |
| F(13)              | F(7)  | C(85)              | 60.30(1)   | F(7)  | F(8)  | F(9)               | 147.430(9) |
| F(7)               | F(8)  | C(85)              | 71.188(9)  | F(9)  | F(8)  | C(85)              | 76.2468(3) |
| F(7)               | F(9)  | F(8)               | 17.860(6)  | F(7)  | F(9)  | F(10)              | 99.123(6)  |
| F(7)               | F(9)  | C(85)              | 51.977(4)  | F(8)  | F(9)  | F(10)              | 114.965(1) |
| F(8)               | F(9)  | C(85)              | 69.834(9)  | F(10) | F(9)  | C(85)              | 53.770(9)  |

Table 4. Bond Angles(°) (continued)

| atom  | atom  | atom  | angle       | atom  | atom  | atom  | angle      |
|-------|-------|-------|-------------|-------|-------|-------|------------|
| F(9)  | F(10) | F(11) | 107.96(1)   | F(9)  | F(10) | C(85) | 55.4575(7) |
| F(11) | F(10) | C(85) | 61.17(1)    | F(10) | F(11) | F(12) | 141.444(9) |
| F(10) | F(11) | F(13) | 118.38(2)   | F(10) | F(11) | C(85) | 70.577(8)  |
| F(12) | F(11) | F(13) | 28.837(7)   | F(12) | F(11) | C(85) | 70.922(2)  |
| F(13) | F(11) | C(85) | 51.537(7)   | F(11) | F(12) | F(13) | 114.344(9) |
| F(11) | F(12) | C(85) | 60.77(1)    | F(13) | F(12) | C(85) | 67.40(2)   |
| F(7)  | F(13) | F(11) | 105.473(10) | F(7)  | F(13) | F(12) | 139.79(1)  |
| F(7)  | F(13) | C(85) | 66.0003(3)  | F(11) | F(13) | F(12) | 36.818(2)  |
| F(11) | F(13) | C(85) | 49.08(1)    | F(12) | F(13) | C(85) | 74.75(1)   |
| F(15) | F(14) | F(16) | 24.084(4)   | F(15) | F(14) | F(19) | 120.271(6) |
| F(15) | F(14) | F(20) | 139.6167(7) | F(15) | F(14) | C(89) | 71.270(8)  |
| F(16) | F(14) | F(19) | 96.190(3)   | F(16) | F(14) | F(20) | 115.679(3) |
| F(16) | F(14) | C(89) | 48.583(4)   | F(19) | F(14) | F(20) | 20.396(6)  |
| F(19) | F(14) | C(89) | 52.167(2)   | F(20) | F(14) | C(89) | 68.924(7)  |
| F(14) | F(15) | F(16) | 132.108(9)  | F(14) | F(15) | C(89) | 67.142(3)  |
| F(16) | F(15) | C(89) | 66.973(6)   | F(14) | F(16) | F(15) | 23.808(5)  |
| F(14) | F(16) | F(17) | 91.666(9)   | F(14) | F(16) | C(89) | 48.549(8)  |
| F(15) | F(16) | F(17) | 114.230(4)  | F(15) | F(16) | C(89) | 70.97(1)   |
| F(17) | F(16) | C(89) | 56.56(1)    | F(16) | F(17) | F(18) | 127.40(1)  |
| F(16) | F(17) | C(89) | 55.4088(4)  | F(18) | F(17) | C(89) | 72.39(1)   |
| F(17) | F(18) | F(19) | 119.705(10) | F(17) | F(18) | C(89) | 68.87(2)   |
| F(19) | F(18) | C(89) | 58.146(9)   | F(14) | F(19) | F(18) | 99.163(1)  |
| F(14) | F(19) | F(20) | 31.769(7)   | F(14) | F(19) | C(89) | 49.831(3)  |
| F(18) | F(19) | F(20) | 130.799(6)  | F(18) | F(19) | C(89) | 58.396(4)  |

Table 4. Bond Angles(°) (continued)

| atom  | atom  | atom  | angle      | atom                | atom  | atom   | angle      |
|-------|-------|-------|------------|---------------------|-------|--------|------------|
| F(20) | F(19) | C(89) | 76.484(10) | F(14)               | F(20) | F(19)  | 127.84(1)  |
| F(14) | F(20) | C(89) | 62.116(3)  | F(19)               | F(20) | C(89)  | 72.167(9)  |
| F(22) | F(21) | F(26) | 129.938(8) | F(22)               | F(21) | F(27)  | 159.002(2) |
| F(22) | F(21) | C(90) | 60.370(2)  | F(26)               | F(21) | F(27)  | 33.641(4)  |
| F(26) | F(21) | C(90) | 71.248(6)  | F(27)               | F(21) | C(90)  | 99.2784(9) |
| F(21) | F(22) | F(23) | 119.297(7) | F(21)               | F(22) | C(90)  | 50.904(6)  |
| F(23) | F(22) | C(90) | 70.7025(3) | F(22)               | F(23) | F(24)  | 97.268(2)  |
| F(22) | F(23) | C(90) | 57.662(4)  | F(24)               | F(23) | C(90)  | 54.256(4)  |
| F(23) | F(24) | F(25) | 149.177(5) | F(23)               | F(24) | C(90)  | 72.04(1)   |
| F(25) | F(24) | C(90) | 77.91(2)   | F(24)               | F(25) | F(26)  | 111.586(8) |
| F(24) | F(25) | C(90) | 62.28(1)   | F(26)               | F(25) | C(90)  | 53.965(5)  |
| F(21) | F(26) | F(25) | 98.290(3)  | F(21)               | F(26) | F(27)  | 30.157(5)  |
| F(21) | F(26) | C(90) | 54.595(10) | F(25)               | F(26) | F(27)  | 128.445(2) |
| F(25) | F(26) | C(90) | 55.16(1)   | F(27)               | F(26) | C(90)  | 80.43(1)   |
| F(21) | F(27) | F(26) | 116.202(9) | F(21)               | F(27) | C(90)  | 53.960(3)  |
| F(26) | F(27) | C(90) | 69.82(1)   | C(6)                | O(1)  | C(8)   | 115.8(8)   |
| C(8)  | O(2)  | C(9)  | 116.1(8)   | C(11)               | O(3)  | C(16)  | 117.4(8)   |
| C(16) | O(4)  | C(17) | 117.1(8)   | C(19)               | O(5)  | C(24)  | 117.7(8)   |
| C(24) | O(6)  | C(25) | 116.4(8)   | C(27)               | O(7)  | C(32)  | 117.4(8)   |
| C(2)  | O(8)  | C(32) | 116.2(8)   | Mn(1)               | O(9)  | C(81)  | 126.5(9)   |
| Mn(1) | O(10) | C(83) | 128.2(9)   | Mn(1)               | O(11) | C(86)  | 127.3(8)   |
| Mn(1) | O(12) | C(88) | 125.4(9)   | C(92)               | O(14) | C(93)  | 117(1)     |
| C(96) | O(16) | C(97) | 123.494(2) | C(100)              | O(18) | C(101) | 118.941(4) |
| C(34) | N(1)  | C(35) | 116(1)     | Mn(1) <sup>2)</sup> | N(2)  | C(35)  | 125.4(8)   |

Table 4. Bond Angles(°) (continued)

| atom                | atom  | atom  | angle     | atom  | atom  | atom  | angle     |
|---------------------|-------|-------|-----------|-------|-------|-------|-----------|
| Mn(1) <sup>2)</sup> | N(2)  | C(36) | 118.8(8)  | C(35) | N(2)  | C(36) | 115.8(10) |
| C(38)               | N(3)  | C(39) | 116.4(10) | C(39) | N(4)  | C(40) | 116(1)    |
| Mn(1)               | N(5)  | C(42) | 123.7(8)  | Mn(1) | N(5)  | C(43) | 121.0(8)  |
| C(42)               | N(5)  | C(43) | 115.4(10) | C(43) | N(6)  | C(44) | 114(1)    |
| C(46)               | N(7)  | C(47) | 114(1)    | C(47) | N(8)  | C(48) | 113(1)    |
| C(2)                | C(1)  | C(6)  | 116(1)    | C(2)  | C(1)  | C(33) | 120.8(10) |
| C(6)                | C(1)  | C(33) | 122(1)    | O(8)  | C(2)  | C(1)  | 116.9(10) |
| O(8)                | C(2)  | C(3)  | 120.2(10) | C(1)  | C(2)  | C(3)  | 122.8(10) |
| C(2)                | C(3)  | C(4)  | 117.3(10) | C(2)  | C(3)  | C(31) | 120.4(10) |
| C(4)                | C(3)  | C(31) | 122.3(10) | C(3)  | C(4)  | C(5)  | 124(1)    |
| C(3)                | C(4)  | H(1)  | 119.8     | C(5)  | C(4)  | H(1)  | 116.0     |
| C(4)                | C(5)  | C(6)  | 117(1)    | C(4)  | C(5)  | C(7)  | 125(1)    |
| C(6)                | C(5)  | C(7)  | 117.7(9)  | O(1)  | C(6)  | C(1)  | 117.3(10) |
| O(1)                | C(6)  | C(5)  | 120.9(10) | C(1)  | C(6)  | C(5)  | 121.5(10) |
| C(5)                | C(7)  | C(14) | 108.7(9)  | C(5)  | C(7)  | C(49) | 113.4(9)  |
| C(5)                | C(7)  | H(2)  | 107.1     | C(14) | C(7)  | C(49) | 113.7(9)  |
| C(14)               | C(7)  | H(2)  | 108.5     | C(49) | C(7)  | H(2)  | 105.1     |
| O(1)                | C(8)  | O(2)  | 112.6(9)  | O(1)  | C(8)  | H(3)  | 109.6     |
| O(1)                | C(8)  | H(4)  | 108.3     | O(2)  | C(8)  | H(3)  | 111.5     |
| O(2)                | C(8)  | H(4)  | 109.0     | H(3)  | C(8)  | H(4)  | 105.5     |
| O(2)                | C(9)  | C(10) | 117.0(10) | O(2)  | C(9)  | C(14) | 119.3(10) |
| C(10)               | C(9)  | C(14) | 123(1)    | C(9)  | C(10) | C(11) | 117(1)    |
| C(9)                | C(10) | C(37) | 122(1)    | C(11) | C(10) | C(37) | 120(1)    |
| O(3)                | C(11) | C(10) | 118.0(10) | O(3)  | C(11) | C(12) | 120(1)    |

Table 4. Bond Angles(°) (continued)

| atom  | atom  | atom  | angle     | atom  | atom  | atom  | angle     |
|-------|-------|-------|-----------|-------|-------|-------|-----------|
| C(10) | C(11) | C(12) | 121(1)    | C(11) | C(12) | C(13) | 117(1)    |
| C(11) | C(12) | C(15) | 119.2(10) | C(13) | C(12) | C(15) | 123.0(10) |
| C(12) | C(13) | C(14) | 123.2(10) | C(12) | C(13) | H(5)  | 119.6     |
| C(14) | C(13) | H(5)  | 117.2     | C(7)  | C(14) | C(9)  | 119(1)    |
| C(7)  | C(14) | C(13) | 123.7(10) | C(9)  | C(14) | C(13) | 116(1)    |
| C(12) | C(15) | C(22) | 107.5(9)  | C(12) | C(15) | C(57) | 113.5(9)  |
| C(12) | C(15) | H(6)  | 109.6     | C(22) | C(15) | C(57) | 114.2(9)  |
| C(22) | C(15) | H(6)  | 106.7     | C(57) | C(15) | H(6)  | 105.0     |
| O(3)  | C(16) | O(4)  | 112.9(9)  | O(3)  | C(16) | H(7)  | 110.4     |
| O(3)  | C(16) | H(8)  | 112.1     | O(4)  | C(16) | H(7)  | 108.1     |
| O(4)  | C(16) | H(8)  | 108.7     | H(7)  | C(16) | H(8)  | 104.3     |
| O(4)  | C(17) | C(18) | 118(1)    | O(4)  | C(17) | C(22) | 120(1)    |
| C(18) | C(17) | C(22) | 120(1)    | C(17) | C(18) | C(19) | 119(1)    |
| C(17) | C(18) | C(41) | 119.2(9)  | C(19) | C(18) | C(41) | 121.2(10) |
| O(5)  | C(19) | C(18) | 118.1(10) | O(5)  | C(19) | C(20) | 120.3(10) |
| C(18) | C(19) | C(20) | 121(1)    | C(19) | C(20) | C(21) | 117.9(10) |
| C(19) | C(20) | C(23) | 120.8(10) | C(21) | C(20) | C(23) | 121.3(10) |
| C(20) | C(21) | C(22) | 122.2(10) | C(20) | C(21) | H(9)  | 118.2     |
| C(22) | C(21) | H(9)  | 119.5     | C(15) | C(22) | C(17) | 120(1)    |
| C(15) | C(22) | C(21) | 121.1(10) | C(17) | C(22) | C(21) | 118(1)    |
| C(20) | C(23) | C(30) | 107.7(8)  | C(20) | C(23) | C(65) | 111.7(9)  |
| C(20) | C(23) | H(10) | 107.5     | C(30) | C(23) | C(65) | 114.9(9)  |
| C(30) | C(23) | H(10) | 108.9     | C(65) | C(23) | H(10) | 105.8     |
| O(5)  | C(24) | O(6)  | 112.4(9)  | O(5)  | C(24) | H(11) | 108.6     |

Table 4. Bond Angles(°) (continued)

| atom  | atom  | atom  | angle     | atom  | atom  | atom  | angle     |
|-------|-------|-------|-----------|-------|-------|-------|-----------|
| O(5)  | C(24) | H(12) | 107.9     | O(6)  | C(24) | H(11) | 109.1     |
| O(6)  | C(24) | H(12) | 110.0     | H(11) | C(24) | H(12) | 108.8     |
| O(6)  | C(25) | C(26) | 117.8(10) | O(6)  | C(25) | C(30) | 119(1)    |
| C(26) | C(25) | C(30) | 122(1)    | C(25) | C(26) | C(27) | 117(1)    |
| C(25) | C(26) | C(45) | 121(1)    | C(27) | C(26) | C(45) | 121(1)    |
| O(7)  | C(27) | C(26) | 116.6(9)  | O(7)  | C(27) | C(28) | 120.1(9)  |
| C(26) | C(27) | C(28) | 123(1)    | C(27) | C(28) | C(29) | 116.7(10) |
| C(27) | C(28) | C(31) | 119.6(9)  | C(29) | C(28) | C(31) | 123.8(10) |
| C(28) | C(29) | C(30) | 122.0(10) | C(28) | C(29) | H(13) | 121.5     |
| C(30) | C(29) | H(13) | 116.4     | C(23) | C(30) | C(25) | 118.3(10) |
| C(23) | C(30) | C(29) | 123.2(10) | C(25) | C(30) | C(29) | 118(1)    |
| C(3)  | C(31) | C(28) | 106.9(9)  | C(3)  | C(31) | C(73) | 115.2(9)  |
| C(3)  | C(31) | H(14) | 108.1     | C(28) | C(31) | C(73) | 113.6(9)  |
| C(28) | C(31) | H(14) | 108.9     | C(73) | C(31) | H(14) | 104.0     |
| O(7)  | C(32) | O(8)  | 114.5(9)  | O(7)  | C(32) | H(15) | 110.6     |
| O(7)  | C(32) | H(16) | 111.5     | O(8)  | C(32) | H(15) | 107.2     |
| O(8)  | C(32) | H(16) | 107.4     | H(15) | C(32) | H(16) | 105.1     |
| C(1)  | C(33) | C(34) | 123(1)    | C(1)  | C(33) | C(36) | 120(1)    |
| C(34) | C(33) | C(36) | 115(1)    | N(1)  | C(34) | C(33) | 123(1)    |
| N(1)  | C(34) | H(17) | 120.9     | C(33) | C(34) | H(17) | 116.0     |
| N(1)  | C(35) | N(2)  | 126(1)    | N(1)  | C(35) | H(18) | 116.3     |
| N(2)  | C(35) | H(18) | 117.4     | N(2)  | C(36) | C(33) | 122(1)    |
| N(2)  | C(36) | H(19) | 120.4     | C(33) | C(36) | H(19) | 116.8     |
| C(10) | C(37) | C(38) | 122(1)    | C(10) | C(37) | C(40) | 122.1(10) |

Table 4. Bond Angles(°) (continued)

| atom  | atom  | atom  | angle    | atom  | atom  | atom  | angle  |
|-------|-------|-------|----------|-------|-------|-------|--------|
| C(38) | C(37) | C(40) | 115(1)   | N(3)  | C(38) | C(37) | 122(1) |
| N(3)  | C(38) | H(20) | 118.7    | C(37) | C(38) | H(20) | 119.1  |
| N(3)  | C(39) | N(4)  | 125(1)   | N(3)  | C(39) | H(21) | 118.8  |
| N(4)  | C(39) | H(21) | 115.3    | N(4)  | C(40) | C(37) | 123(1) |
| N(4)  | C(40) | H(22) | 116.0    | C(37) | C(40) | H(22) | 120.4  |
| C(18) | C(41) | C(42) | 124(1)   | C(18) | C(41) | C(44) | 119(1) |
| C(42) | C(41) | C(44) | 116(1)   | N(5)  | C(42) | C(41) | 122(1) |
| N(5)  | C(42) | H(23) | 118.1    | C(41) | C(42) | H(23) | 119.3  |
| N(5)  | C(43) | N(6)  | 127(1)   | N(5)  | C(43) | H(24) | 115.6  |
| N(6)  | C(43) | H(24) | 116.4    | N(6)  | C(44) | C(41) | 123(1) |
| N(6)  | C(44) | H(25) | 119.0    | C(41) | C(44) | H(25) | 117.2  |
| C(26) | C(45) | C(46) | 120(1)   | C(26) | C(45) | C(48) | 124(1) |
| C(46) | C(45) | C(48) | 114(1)   | N(7)  | C(46) | C(45) | 122(1) |
| N(7)  | C(46) | H(26) | 118.5    | C(45) | C(46) | H(26) | 118.5  |
| N(7)  | C(47) | N(8)  | 128(1)   | N(7)  | C(47) | H(27) | 113.8  |
| N(8)  | C(47) | H(27) | 117.4    | N(8)  | C(48) | C(45) | 125(1) |
| N(8)  | C(48) | H(28) | 118.2    | C(45) | C(48) | H(28) | 116.0  |
| C(7)  | C(49) | C(50) | 110.3(9) | C(7)  | C(49) | H(29) | 111.6  |
| C(7)  | C(49) | H(30) | 112.7    | C(50) | C(49) | H(29) | 109.9  |
| C(50) | C(49) | H(30) | 106.6    | H(29) | C(49) | H(30) | 105.5  |
| C(49) | C(50) | C(51) | 113.5(9) | C(49) | C(50) | H(31) | 104.5  |
| C(49) | C(50) | H(32) | 107.8    | C(51) | C(50) | H(31) | 113.8  |
| C(51) | C(50) | H(32) | 111.5    | H(31) | C(50) | H(32) | 105.1  |
| C(50) | C(51) | C(52) | 118(1)   | C(50) | C(51) | C(56) | 121(1) |

Table 4. Bond Angles(°) (continued)

| atom  | atom  | atom  | angle     | atom  | atom  | atom  | angle  |
|-------|-------|-------|-----------|-------|-------|-------|--------|
| C(52) | C(51) | C(56) | 119(1)    | C(51) | C(52) | C(53) | 120(1) |
| C(51) | C(52) | H(33) | 118.5     | C(53) | C(52) | H(33) | 121.1  |
| C(52) | C(53) | C(54) | 119(1)    | C(52) | C(53) | H(34) | 119.2  |
| C(54) | C(53) | H(34) | 121.0     | C(53) | C(54) | C(55) | 119(1) |
| C(53) | C(54) | H(35) | 116.1     | C(55) | C(54) | H(35) | 123.7  |
| C(54) | C(55) | C(56) | 120(1)    | C(54) | C(55) | H(36) | 119.9  |
| C(56) | C(55) | H(36) | 120.0     | C(51) | C(56) | C(55) | 120(1) |
| C(51) | C(56) | H(37) | 117.3     | C(55) | C(56) | H(37) | 122.0  |
| C(15) | C(57) | C(58) | 113.1(9)  | C(15) | C(57) | H(38) | 109.1  |
| C(15) | C(57) | H(39) | 108.8     | C(58) | C(57) | H(38) | 110.8  |
| C(58) | C(57) | H(39) | 110.0     | H(38) | C(57) | H(39) | 104.7  |
| C(57) | C(58) | C(59) | 112.7(10) | C(57) | C(58) | H(40) | 111.3  |
| C(57) | C(58) | H(41) | 109.2     | C(59) | C(58) | H(40) | 109.6  |
| C(59) | C(58) | H(41) | 107.9     | H(40) | C(58) | H(41) | 105.9  |
| C(58) | C(59) | C(60) | 120(1)    | C(58) | C(59) | C(64) | 120(1) |
| C(60) | C(59) | C(64) | 118(1)    | C(59) | C(60) | C(61) | 121(1) |
| C(59) | C(60) | H(42) | 118.5     | C(61) | C(60) | H(42) | 119.9  |
| C(60) | C(61) | C(62) | 119(1)    | C(60) | C(61) | H(43) | 121.5  |
| C(62) | C(61) | H(43) | 118.5     | C(61) | C(62) | C(63) | 119(1) |
| C(61) | C(62) | H(44) | 122.0     | C(63) | C(62) | H(44) | 118.5  |
| C(62) | C(63) | C(64) | 121(1)    | C(62) | C(63) | H(45) | 121.8  |
| C(64) | C(63) | H(45) | 116.3     | C(59) | C(64) | C(63) | 119(1) |
| C(59) | C(64) | H(46) | 118.1     | C(63) | C(64) | H(46) | 122.7  |
| C(23) | C(65) | C(66) | 113.3(9)  | C(23) | C(65) | H(47) | 110.4  |

Table 4. Bond Angles(°) (continued)

| atom  | atom  | atom  | angle     | atom  | atom  | atom  | angle     |
|-------|-------|-------|-----------|-------|-------|-------|-----------|
| C(23) | C(65) | H(48) | 109.7     | C(66) | C(65) | H(47) | 109.8     |
| C(66) | C(65) | H(48) | 107.6     | H(47) | C(65) | H(48) | 105.7     |
| C(65) | C(66) | C(67) | 113.6(10) | C(65) | C(66) | H(49) | 105.6     |
| C(65) | C(66) | H(50) | 108.3     | C(67) | C(66) | H(49) | 109.1     |
| C(67) | C(66) | H(50) | 111.5     | H(49) | C(66) | H(50) | 108.3     |
| C(66) | C(67) | C(68) | 121(1)    | C(66) | C(67) | C(72) | 121(1)    |
| C(68) | C(67) | C(72) | 116(1)    | C(67) | C(68) | C(69) | 121(1)    |
| C(67) | C(68) | H(51) | 118.3     | C(69) | C(68) | H(51) | 119.8     |
| C(68) | C(69) | C(70) | 120(1)    | C(68) | C(69) | H(52) | 120.9     |
| C(70) | C(69) | H(52) | 118.4     | C(69) | C(70) | C(71) | 118(1)    |
| C(69) | C(70) | H(53) | 123.4     | C(71) | C(70) | H(53) | 118.3     |
| C(70) | C(71) | C(72) | 121(1)    | C(70) | C(71) | H(54) | 121.2     |
| C(72) | C(71) | H(54) | 117.5     | C(67) | C(72) | C(71) | 120(1)    |
| C(67) | C(72) | H(55) | 120.5     | C(71) | C(72) | H(55) | 118.7     |
| C(31) | C(73) | C(74) | 111.8(9)  | C(31) | C(73) | H(56) | 108.9     |
| C(31) | C(73) | H(57) | 109.7     | C(74) | C(73) | H(56) | 112.6     |
| C(74) | C(73) | H(57) | 109.2     | H(56) | C(73) | H(57) | 104.3     |
| C(73) | C(74) | C(75) | 113.0(9)  | C(73) | C(74) | H(58) | 105.0     |
| C(73) | C(74) | H(59) | 109.2     | C(75) | C(74) | H(58) | 109.2     |
| C(75) | C(74) | H(59) | 110.8     | H(58) | C(74) | H(59) | 109.5     |
| C(74) | C(75) | C(76) | 121(1)    | C(74) | C(75) | C(80) | 120.7(10) |
| C(76) | C(75) | C(80) | 117(1)    | C(75) | C(76) | C(77) | 121(1)    |
| C(75) | C(76) | H(60) | 120.6     | C(77) | C(76) | H(60) | 117.5     |
| C(76) | C(77) | C(78) | 119(1)    | C(76) | C(77) | H(61) | 121.3     |

Table 4. Bond Angles(°) (continued)

| atom  | atom  | atom  | angle      | atom  | atom  | atom  | angle      |
|-------|-------|-------|------------|-------|-------|-------|------------|
| C(78) | C(77) | H(61) | 119.2      | C(77) | C(78) | C(79) | 119(1)     |
| C(77) | C(78) | H(62) | 121.8      | C(79) | C(78) | H(62) | 118.9      |
| C(78) | C(79) | C(80) | 122(1)     | C(78) | C(79) | H(63) | 118.1      |
| C(80) | C(79) | H(63) | 119.8      | C(75) | C(80) | C(79) | 119(1)     |
| C(75) | C(80) | H(64) | 119.3      | C(79) | C(80) | H(64) | 121.2      |
| O(9)  | C(81) | C(82) | 129(1)     | O(9)  | C(81) | C(84) | 113(1)     |
| C(82) | C(81) | C(84) | 116(1)     | C(81) | C(82) | C(83) | 123(1)     |
| C(81) | C(82) | H(65) | 118.1      | C(83) | C(82) | H(65) | 117.9      |
| O(10) | C(83) | C(82) | 126(1)     | O(10) | C(83) | C(85) | 115(1)     |
| C(82) | C(83) | C(85) | 117(1)     | F(1)  | C(84) | F(2)  | 36.993(3)  |
| F(1)  | C(84) | F(3)  | 109.05(1)  | F(1)  | C(84) | F(4)  | 130.100(5) |
| F(1)  | C(84) | F(5)  | 106.22(1)  | F(1)  | C(84) | F(6)  | 72.77(2)   |
| F(1)  | C(84) | C(81) | 114.4(5)   | F(2)  | C(84) | F(3)  | 74.73(1)   |
| F(2)  | C(84) | F(4)  | 112.828(4) | F(2)  | C(84) | F(5)  | 130.616(8) |
| F(2)  | C(84) | F(6)  | 108.03(1)  | F(2)  | C(84) | C(81) | 112.7(5)   |
| F(3)  | C(84) | F(4)  | 48.444(5)  | F(3)  | C(84) | F(5)  | 106.938(4) |
| F(3)  | C(84) | F(6)  | 141.063(6) | F(3)  | C(84) | C(81) | 106.1(5)   |
| F(4)  | C(84) | F(5)  | 59.670(9)  | F(4)  | C(84) | F(6)  | 99.36(1)   |
| F(4)  | C(84) | C(81) | 114.8(5)   | F(5)  | C(84) | F(6)  | 40.999(2)  |
| F(5)  | C(84) | C(81) | 113.8(5)   | F(6)  | C(84) | C(81) | 108.0(5)   |
| F(7)  | C(85) | F(8)  | 41.492(7)  | F(7)  | C(85) | F(9)  | 75.41(2)   |
| F(7)  | C(85) | F(10) | 131.956(9) | F(7)  | C(85) | F(11) | 120.188(3) |
| F(7)  | C(85) | F(12) | 91.20(2)   | F(7)  | C(85) | F(13) | 53.70(1)   |
| F(7)  | C(85) | C(83) | 111.8(5)   | F(8)  | C(85) | F(9)  | 33.920(10) |

Table 4. Bond Angles(°) (continued)

| atom  | atom  | atom  | angle      | atom  | atom  | atom  | angle       |
|-------|-------|-------|------------|-------|-------|-------|-------------|
| F(8)  | C(85) | F(10) | 99.334(2)  | F(8)  | C(85) | F(11) | 122.1344(1) |
| F(8)  | C(85) | F(12) | 124.602(9) | F(8)  | C(85) | F(13) | 91.589(5)   |
| F(8)  | C(85) | C(83) | 114.7(5)   | F(9)  | C(85) | F(10) | 70.772(8)   |
| F(9)  | C(85) | F(11) | 110.402(3) | F(9)  | C(85) | F(12) | 143.969(2)  |
| F(9)  | C(85) | F(13) | 122.478(5) | F(9)  | C(85) | C(83) | 107.6(5)    |
| F(10) | C(85) | F(11) | 48.251(6)  | F(10) | C(85) | F(12) | 96.54(1)    |
| F(10) | C(85) | F(13) | 123.69(1)  | F(10) | C(85) | C(83) | 110.4(5)    |
| F(11) | C(85) | F(12) | 48.307(9)  | F(11) | C(85) | F(13) | 79.387(6)   |
| F(11) | C(85) | C(83) | 121.1(5)   | F(12) | C(85) | F(13) | 37.845(5)   |
| F(12) | C(85) | C(83) | 108.4(5)   | F(13) | C(85) | C(83) | 114.4(5)    |
| O(11) | C(86) | C(87) | 125(1)     | O(11) | C(86) | C(89) | 115(1)      |
| C(87) | C(86) | C(89) | 118(1)     | C(86) | C(87) | C(88) | 123(1)      |
| C(86) | C(87) | H(66) | 113.0      | C(88) | C(87) | H(66) | 123.6       |
| O(12) | C(88) | C(87) | 128(1)     | O(12) | C(88) | C(90) | 117(1)      |
| C(87) | C(88) | C(90) | 114(1)     | F(14) | C(89) | F(15) | 41.588(5)   |
| F(14) | C(89) | F(16) | 82.87(1)   | F(14) | C(89) | F(17) | 122.209(5)  |
| F(14) | C(89) | F(18) | 125.150(4) | F(14) | C(89) | F(19) | 78.002(5)   |
| F(14) | C(89) | F(20) | 48.960(4)  | F(14) | C(89) | C(86) | 118.1(5)    |
| F(15) | C(89) | F(16) | 42.053(6)  | F(15) | C(89) | F(17) | 100.767(5)  |
| F(15) | C(89) | F(18) | 131.101(7) | F(15) | C(89) | F(19) | 116.9395(9) |
| F(15) | C(89) | F(20) | 90.3375(9) | F(15) | C(89) | C(86) | 113.7(5)    |
| F(16) | C(89) | F(17) | 68.03(1)   | F(16) | C(89) | F(18) | 106.53(2)   |
| F(16) | C(89) | F(19) | 144.667(1) | F(16) | C(89) | F(20) | 129.522(7)  |
| F(16) | C(89) | C(86) | 106.0(5)   | F(17) | C(89) | F(18) | 38.746(4)   |

Table 4. Bond Angles(°) (continued)

| atom  | atom   | atom  | angle       | atom  | atom   | atom  | angle      |
|-------|--------|-------|-------------|-------|--------|-------|------------|
| F(17) | C(89)  | F(19) | 97.83(1)    | F(17) | C(89)  | F(20) | 121.16(1)  |
| F(17) | C(89)  | C(86) | 117.5(5)    | F(18) | C(89)  | F(19) | 63.46(1)   |
| F(18) | C(89)  | F(20) | 93.12(1)    | F(18) | C(89)  | C(86) | 110.9(5)   |
| F(19) | C(89)  | F(20) | 31.3487(3)  | F(19) | C(89)  | C(86) | 109.2(5)   |
| F(20) | C(89)  | C(86) | 109.5(5)    | F(21) | C(90)  | F(22) | 68.727(4)  |
| F(21) | C(90)  | F(23) | 118.0871(4) | F(21) | C(90)  | F(24) | 122.287(5) |
| F(21) | C(90)  | F(25) | 110.622(9)  | F(21) | C(90)  | F(26) | 54.157(4)  |
| F(21) | C(90)  | F(27) | 26.761(2)   | F(21) | C(90)  | C(88) | 117.7(6)   |
| F(22) | C(90)  | F(23) | 51.635(4)   | F(22) | C(90)  | F(24) | 92.125(9)  |
| F(22) | C(90)  | F(25) | 125.588(8)  | F(22) | C(90)  | F(26) | 121.505(8) |
| F(22) | C(90)  | F(27) | 95.376(7)   | F(22) | C(90)  | C(88) | 110.7(7)   |
| F(23) | C(90)  | F(24) | 53.70(1)    | F(23) | C(90)  | F(25) | 93.30(1)   |
| F(23) | C(90)  | F(26) | 154.2927(7) | F(23) | C(90)  | F(27) | 144.232(1) |
| F(23) | C(90)  | C(88) | 99.0(6)     | F(24) | C(90)  | F(25) | 39.813(1)  |
| F(24) | C(90)  | F(26) | 106.89(2)   | F(24) | C(90)  | F(27) | 126.03(1)  |
| F(24) | C(90)  | C(88) | 120.0(6)    | F(25) | C(90)  | F(26) | 70.88(2)   |
| F(25) | C(90)  | F(27) | 97.51(1)    | F(25) | C(90)  | C(88) | 115.4(7)   |
| F(26) | C(90)  | F(27) | 29.744(2)   | F(26) | C(90)  | C(88) | 106.1(6)   |
| F(27) | C(90)  | C(88) | 106.7(5)    | O(13) | C(92)  | O(14) | 121(1)     |
| O(13) | C(92)  | C(91) | 121(1)      | O(14) | C(92)  | C(91) | 116(1)     |
| O(14) | C(93)  | C(94) | 113(2)      | O(15) | C(96)  | O(16) | 120.209(8) |
| O(15) | C(96)  | C(95) | 129.177(4)  | O(16) | C(96)  | C(95) | 110.606(3) |
| O(16) | C(97)  | C(98) | 127.472(3)  | O(17) | C(100) | O(18) | 115.530(7) |
| O(17) | C(100) | C(99) | 137.547(7)  | O(18) | C(100) | C(99) | 106.33(1)  |

Table 4. Bond Angles( $^{\circ}$ ) (continued)

| atom  | atom   | atom   | angle      | atom | atom | atom | angle |
|-------|--------|--------|------------|------|------|------|-------|
| O(18) | C(101) | C(102) | 108.485(1) |      |      |      |       |

Symmetry operations

|     |           |     |           |
|-----|-----------|-----|-----------|
| (1) | X-1,Y,Z-1 | (2) | X+1,Y,Z+1 |
|-----|-----------|-----|-----------|

Table 5. Torsion Angles(°)

| atom  | atom  | atom  | atom  | angle       | atom  | atom  | atom  | atom  | angle       |
|-------|-------|-------|-------|-------------|-------|-------|-------|-------|-------------|
| Mn(1) | O(9)  | C(81) | C(82) | 3(2)        | Mn(1) | O(9)  | C(81) | C(84) | -175.2(5)   |
| Mn(1) | O(10) | C(83) | C(82) | 6(2)        | Mn(1) | O(10) | C(83) | C(85) | -179.7(5)   |
| Mn(1) | O(11) | C(86) | C(87) | 14(1)       | Mn(1) | O(11) | C(86) | C(89) | -164.8(5)   |
| Mn(1) | O(12) | C(88) | C(87) | -21(2)      | Mn(1) | O(12) | C(88) | C(90) | 158.4(6)    |
| Mn(1) | N(5)  | C(42) | C(41) | 179.5(9)    | Mn(1) | N(5)  | C(43) | N(6)  | 178(1)      |
| F(1)  | F(2)  | F(3)  | F(4)  | 10.6948(2)  | F(1)  | F(2)  | F(3)  | C(84) | -25.407(1)  |
| F(1)  | F(2)  | C(84) | F(3)  | 157.634(4)  | F(1)  | F(2)  | C(84) | F(4)  | 127.062(3)  |
| F(1)  | F(2)  | C(84) | F(5)  | 58.21(1)    | F(1)  | F(2)  | C(84) | F(6)  | 18.251(5)   |
| F(1)  | F(2)  | C(84) | C(81) | -100.9(6)   | F(1)  | F(6)  | F(5)  | F(4)  | 14.498(1)   |
| F(1)  | F(6)  | F(5)  | C(84) | 31.8414(8)  | F(1)  | F(6)  | C(84) | F(2)  | -11.379(1)  |
| F(1)  | F(6)  | C(84) | F(3)  | -99.2049(7) | F(1)  | F(6)  | C(84) | F(4)  | -129.226(3) |
| F(1)  | F(6)  | C(84) | F(5)  | -143.379(3) | F(1)  | F(6)  | C(84) | C(81) | 110.7(5)    |
| F(1)  | C(84) | F(2)  | F(3)  | -157.634(4) | F(1)  | C(84) | F(3)  | F(2)  | 14.0189(4)  |
| F(1)  | C(84) | F(3)  | F(4)  | -127.193(4) | F(1)  | C(84) | F(4)  | F(3)  | 79.85(1)    |
| F(1)  | C(84) | F(4)  | F(5)  | -86.01(1)   | F(1)  | C(84) | F(5)  | F(4)  | 127.37(1)   |
| F(1)  | C(84) | F(5)  | F(6)  | -36.396(10) | F(1)  | C(84) | F(6)  | F(5)  | 143.379(3)  |
| F(1)  | C(84) | C(81) | O(9)  | 158.5(9)    | F(1)  | C(84) | C(81) | C(82) | -20(1)      |
| F(2)  | F(1)  | F(6)  | F(5)  | -17.721(3)  | F(2)  | F(1)  | F(6)  | C(84) | 19.961(6)   |
| F(2)  | F(1)  | C(84) | F(3)  | -22.8529(9) | F(2)  | F(1)  | C(84) | F(4)  | -74.049(3)  |
| F(2)  | F(1)  | C(84) | F(5)  | -137.781(4) | F(2)  | F(1)  | C(84) | F(6)  | -161.833(2) |
| F(2)  | F(1)  | C(84) | C(81) | 95.8(5)     | F(2)  | F(3)  | F(4)  | F(5)  | -15.647(3)  |
| F(2)  | F(3)  | F(4)  | C(84) | -31.093(3)  | F(2)  | F(3)  | C(84) | F(4)  | 141.212(4)  |
| F(2)  | F(3)  | C(84) | F(5)  | 128.482(7)  | F(2)  | F(3)  | C(84) | F(6)  | 99.934(10)  |
| F(2)  | F(3)  | C(84) | C(81) | -109.7(5)   | F(2)  | C(84) | F(1)  | F(6)  | 161.833(2)  |

Table 5. Torsion Angles(°) (continued)

| atom | atom  | atom  | atom  | angle        | atom | atom  | atom  | atom  | angle       |
|------|-------|-------|-------|--------------|------|-------|-------|-------|-------------|
| F(2) | C(84) | F(3)  | F(4)  | -141.212(4)  | F(2) | C(84) | F(4)  | F(3)  | 40.972(9)   |
| F(2) | C(84) | F(4)  | F(5)  | -124.892(10) | F(2) | C(84) | F(5)  | F(4)  | 95.19(2)    |
| F(2) | C(84) | F(5)  | F(6)  | -68.58(1)    | F(2) | C(84) | F(6)  | F(5)  | 132.000(4)  |
| F(2) | C(84) | C(81) | O(9)  | -161.1(9)    | F(2) | C(84) | C(81) | C(82) | 20(1)       |
| F(3) | F(2)  | F(1)  | F(6)  | 4.1415(1)    | F(3) | F(2)  | F(1)  | C(84) | 21.048(1)   |
| F(3) | F(2)  | C(84) | F(4)  | -30.572(2)   | F(3) | F(2)  | C(84) | F(5)  | -99.42(2)   |
| F(3) | F(2)  | C(84) | F(6)  | -139.383(9)  | F(3) | F(2)  | C(84) | C(81) | 101.4(6)    |
| F(3) | F(4)  | F(5)  | F(6)  | 2.6436(2)    | F(3) | F(4)  | F(5)  | C(84) | -16.301(2)  |
| F(3) | F(4)  | C(84) | F(5)  | 165.8639(8)  | F(3) | F(4)  | C(84) | F(6)  | 155.1533(3) |
| F(3) | F(4)  | C(84) | C(81) | -90.0(5)     | F(3) | C(84) | F(1)  | F(6)  | 138.980(3)  |
| F(3) | C(84) | F(4)  | F(5)  | -165.8639(8) | F(3) | C(84) | F(5)  | F(4)  | 11.0        |
| F(3) | C(84) | F(5)  | F(6)  | -152.755(2)  | F(3) | C(84) | F(6)  | F(5)  | 44.174(2)   |
| F(3) | C(84) | C(81) | O(9)  | -81(1)       | F(3) | C(84) | C(81) | C(82) | 100(1)      |
| F(4) | F(3)  | F(2)  | C(84) | 36.1020(9)   | F(4) | F(3)  | C(84) | F(5)  | -12.730(2)  |
| F(4) | F(3)  | C(84) | F(6)  | -41.278(6)   | F(4) | F(3)  | C(84) | C(81) | 109.1(5)    |
| F(4) | F(5)  | F(6)  | C(84) | -17.3431(3)  | F(4) | F(5)  | C(84) | F(6)  | 163.768(2)  |
| F(4) | F(5)  | C(84) | C(81) | -105.9(6)    | F(4) | C(84) | F(1)  | F(6)  | 87.783(1)   |
| F(4) | C(84) | F(5)  | F(6)  | -163.768(2)  | F(4) | C(84) | F(6)  | F(5)  | 14.2        |
| F(4) | C(84) | C(81) | O(9)  | -30(1)       | F(4) | C(84) | C(81) | C(82) | 151.4(10)   |
| F(5) | F(4)  | F(3)  | C(84) | 15.4466(5)   | F(5) | F(4)  | C(84) | F(6)  | -10.7106(5) |
| F(5) | F(4)  | C(84) | C(81) | 104.2(5)     | F(5) | F(6)  | F(1)  | C(84) | -37.682(8)  |
| F(5) | F(6)  | C(84) | C(81) | -105.9(5)    | F(5) | C(84) | F(1)  | F(6)  | 24.052(2)   |
| F(5) | C(84) | C(81) | O(9)  | 36(1)        | F(5) | C(84) | C(81) | C(82) | -142(1)     |
| F(6) | F(1)  | F(2)  | C(84) | -16.906(1)   | F(6) | F(1)  | C(84) | C(81) | -102.4(5)   |

Table 5. Torsion Angles(°) (continued)

| atom | atom  | atom  | atom  | angle        | atom | atom  | atom  | atom  | angle       |
|------|-------|-------|-------|--------------|------|-------|-------|-------|-------------|
| F(6) | F(5)  | F(4)  | C(84) | 18.945(2)    | F(6) | F(5)  | C(84) | C(81) | 90.4(6)     |
| F(6) | C(84) | C(81) | O(9)  | 79(1)        | F(6) | C(84) | C(81) | C(82) | -98(1)      |
| F(7) | F(8)  | F(9)  | F(10) | -29.0080(1)  | F(7) | F(8)  | F(9)  | C(85) | 1.1         |
| F(7) | F(8)  | C(85) | F(9)  | -179.4015(2) | F(7) | F(8)  | C(85) | F(10) | -146.807(6) |
| F(7) | F(8)  | C(85) | F(11) | -100.726(2)  | F(7) | F(8)  | C(85) | F(12) | -42.12(1)   |
| F(7) | F(8)  | C(85) | F(13) | -22.272(7)   | F(7) | F(8)  | C(85) | C(83) | 95.6(6)     |
| F(7) | F(9)  | F(8)  | C(85) | -1.1         | F(7) | F(9)  | F(10) | F(11) | -6.029(2)   |
| F(7) | F(9)  | F(10) | C(85) | 26.992(4)    | F(7) | F(9)  | C(85) | F(8)  | 0.4097(1)   |
| F(7) | F(9)  | C(85) | F(10) | -145.330(5)  | F(7) | F(9)  | C(85) | F(11) | -117.230(2) |
| F(7) | F(9)  | C(85) | F(12) | -71.266(9)   | F(7) | F(9)  | C(85) | F(13) | -27.011(7)  |
| F(7) | F(9)  | C(85) | C(83) | 108.6(6)     | F(7) | F(13) | F(11) | F(10) | -12.7589(5) |
| F(7) | F(13) | F(11) | F(12) | -162.2668(2) | F(7) | F(13) | F(11) | C(85) | -37.009(3)  |
| F(7) | F(13) | F(12) | F(11) | 27.045(5)    | F(7) | F(13) | F(12) | C(85) | -12.709(3)  |
| F(7) | F(13) | C(85) | F(8)  | 18.1541(2)   | F(7) | F(13) | C(85) | F(9)  | 33.0512(5)  |
| F(7) | F(13) | C(85) | F(10) | 120.482(1)   | F(7) | F(13) | C(85) | F(11) | 140.5777(7) |
| F(7) | F(13) | C(85) | F(12) | 171.1        | F(7) | F(13) | C(85) | C(83) | -99.9(6)    |
| F(7) | C(85) | F(8)  | F(9)  | 179.4015(2)  | F(7) | C(85) | F(9)  | F(8)  | -0.4097(1)  |
| F(7) | C(85) | F(9)  | F(10) | 145.330(5)   | F(7) | C(85) | F(10) | F(9)  | -47.755(6)  |
| F(7) | C(85) | F(10) | F(11) | 95.966(8)    | F(7) | C(85) | F(11) | F(10) | -121.17(2)  |
| F(7) | C(85) | F(11) | F(12) | 60.93(2)     | F(7) | C(85) | F(11) | F(13) | 36.303(9)   |
| F(7) | C(85) | F(12) | F(11) | -130.916(8)  | F(7) | C(85) | F(12) | F(13) | 7.199(1)    |
| F(7) | C(85) | F(13) | F(11) | -140.5777(7) | F(7) | C(85) | F(13) | F(12) | -171.1      |
| F(7) | C(85) | C(83) | O(10) | -164.9(9)    | F(7) | C(85) | C(83) | C(82) | 9(1)        |
| F(8) | F(7)  | F(9)  | F(10) | 153.5603(3)  | F(8) | F(7)  | F(9)  | C(85) | -178.7      |

Table 5. Torsion Angles(°) (continued)

| atom | atom  | atom  | atom  | angle        | atom | atom  | atom  | atom  | angle        |
|------|-------|-------|-------|--------------|------|-------|-------|-------|--------------|
| F(8) | F(7)  | F(13) | F(11) | -0.5738(1)   | F(8) | F(7)  | F(13) | F(12) | -16.997(5)   |
| F(8) | F(7)  | F(13) | C(85) | -30.432(9)   | F(8) | F(7)  | C(85) | F(9)  | 0.3          |
| F(8) | F(7)  | C(85) | F(10) | 46.587(2)    | F(8) | F(7)  | C(85) | F(11) | 105.730(5)   |
| F(8) | F(7)  | C(85) | F(12) | 146.484(4)   | F(8) | F(7)  | C(85) | F(13) | 151.958(4)   |
| F(8) | F(7)  | C(85) | C(83) | -103.1(5)    | F(8) | F(9)  | F(7)  | F(13) | -155.5419(3) |
| F(8) | F(9)  | F(7)  | C(85) | 178.7        | F(8) | F(9)  | F(10) | F(11) | 2.6344(8)    |
| F(8) | F(9)  | F(10) | C(85) | 35.655(7)    | F(8) | F(9)  | C(85) | F(10) | -145.740(5)  |
| F(8) | F(9)  | C(85) | F(11) | -117.639(1)  | F(8) | F(9)  | C(85) | F(12) | -71.675(9)   |
| F(8) | F(9)  | C(85) | F(13) | -27.421(7)   | F(8) | F(9)  | C(85) | C(83) | 108.2(6)     |
| F(8) | C(85) | F(7)  | F(9)  | -0.3         | F(8) | C(85) | F(7)  | F(13) | -151.958(4)  |
| F(8) | C(85) | F(9)  | F(10) | 145.740(5)   | F(8) | C(85) | F(10) | F(9)  | -18.564(3)   |
| F(8) | C(85) | F(10) | F(11) | 125.157(4)   | F(8) | C(85) | F(11) | F(10) | -72.309(8)   |
| F(8) | C(85) | F(11) | F(12) | 109.789(9)   | F(8) | C(85) | F(11) | F(13) | 85.160(2)    |
| F(8) | C(85) | F(12) | F(11) | -104.53(1)   | F(8) | C(85) | F(12) | F(13) | 33.586(4)    |
| F(8) | C(85) | F(13) | F(11) | -122.4236(5) | F(8) | C(85) | F(13) | F(12) | -152.9019(1) |
| F(8) | C(85) | C(83) | O(10) | 149.9(8)     | F(8) | C(85) | C(83) | C(82) | -35(1)       |
| F(9) | F(7)  | F(8)  | C(85) | 1.1          | F(9) | F(7)  | F(13) | F(11) | 6.478(2)     |
| F(9) | F(7)  | F(13) | F(12) | -9.946(3)    | F(9) | F(7)  | F(13) | C(85) | -23.380(7)   |
| F(9) | F(7)  | C(85) | F(10) | 46.242(2)    | F(9) | F(7)  | C(85) | F(11) | 105.385(5)   |
| F(9) | F(7)  | C(85) | F(12) | 146.139(4)   | F(9) | F(7)  | C(85) | F(13) | 151.613(4)   |
| F(9) | F(7)  | C(85) | C(83) | -103.4(5)    | F(9) | F(8)  | F(7)  | F(13) | 27.4013(5)   |
| F(9) | F(8)  | F(7)  | C(85) | -1.1         | F(9) | F(8)  | C(85) | F(10) | 32.594(6)    |
| F(9) | F(8)  | C(85) | F(11) | 78.675(2)    | F(9) | F(8)  | C(85) | F(12) | 137.28(1)    |
| F(9) | F(8)  | C(85) | F(13) | 157.130(7)   | F(9) | F(8)  | C(85) | C(83) | -85.0(6)     |

Table 5. Torsion Angles(°) (continued)

| atom  | atom  | atom  | atom  | angle        | atom  | atom  | atom  | atom  | angle        |
|-------|-------|-------|-------|--------------|-------|-------|-------|-------|--------------|
| F(9)  | F(10) | F(11) | F(12) | 34.004(2)    | F(9)  | F(10) | F(11) | F(13) | 10.8833(8)   |
| F(9)  | F(10) | F(11) | C(85) | 30.822(2)    | F(9)  | F(10) | C(85) | F(11) | -143.720(2)  |
| F(9)  | F(10) | C(85) | F(12) | -145.297(2)  | F(9)  | F(10) | C(85) | F(13) | -116.806(1)  |
| F(9)  | F(10) | C(85) | C(83) | 102.2(5)     | F(9)  | C(85) | F(7)  | F(13) | -151.613(4)  |
| F(9)  | C(85) | F(10) | F(11) | 143.720(2)   | F(9)  | C(85) | F(11) | F(10) | -36.592(1)   |
| F(9)  | C(85) | F(11) | F(12) | 145.506(1)   | F(9)  | C(85) | F(11) | F(13) | 120.877(8)   |
| F(9)  | C(85) | F(12) | F(11) | -64.471(6)   | F(9)  | C(85) | F(12) | F(13) | 73.6443(9)   |
| F(9)  | C(85) | F(13) | F(11) | -107.5265(2) | F(9)  | C(85) | F(13) | F(12) | -138.0048(4) |
| F(9)  | C(85) | C(83) | O(10) | 114.2(10)    | F(9)  | C(85) | C(83) | C(82) | -71(1)       |
| F(10) | F(9)  | F(7)  | F(13) | -2.0         | F(10) | F(9)  | F(7)  | C(85) | -27.6937(3)  |
| F(10) | F(9)  | F(8)  | C(85) | -30.0604(1)  | F(10) | F(9)  | C(85) | F(11) | 28.100(3)    |
| F(10) | F(9)  | C(85) | F(12) | 74.06(1)     | F(10) | F(9)  | C(85) | F(13) | 118.32(1)    |
| F(10) | F(9)  | C(85) | C(83) | -106.0(6)    | F(10) | F(11) | F(12) | F(13) | -45.750(3)   |
| F(10) | F(11) | F(12) | C(85) | -3.1753(1)   | F(10) | F(11) | F(13) | F(12) | 149.5079(3)  |
| F(10) | F(11) | F(13) | C(85) | 24.251(2)    | F(10) | F(11) | C(85) | F(12) | 177.9021(4)  |
| F(10) | F(11) | C(85) | F(13) | -157.469(6)  | F(10) | F(11) | C(85) | C(83) | 90.4(6)      |
| F(10) | C(85) | F(7)  | F(13) | -105.371(5)  | F(10) | C(85) | F(11) | F(12) | -177.9021(4) |
| F(10) | C(85) | F(11) | F(13) | 157.469(6)   | F(10) | C(85) | F(12) | F(11) | 1.5753(1)    |
| F(10) | C(85) | F(12) | F(13) | 139.690(7)   | F(10) | C(85) | F(13) | F(11) | -20.0958(6)  |
| F(10) | C(85) | F(13) | F(12) | -50.574(1)   | F(10) | C(85) | C(83) | O(10) | 38(1)        |
| F(10) | C(85) | C(83) | C(82) | -146(1)      | F(11) | F(10) | F(9)  | C(85) | -33.021(6)   |
| F(11) | F(10) | C(85) | F(12) | -1.5766(1)   | F(11) | F(10) | C(85) | F(13) | 26.914(3)    |
| F(11) | F(10) | C(85) | C(83) | -114.0(5)    | F(11) | F(12) | F(13) | C(85) | 39.754(8)    |
| F(11) | F(12) | C(85) | F(13) | -138.115(7)  | F(11) | F(12) | C(85) | C(83) | 115.6(6)     |

Table 5. Torsion Angles(°) (continued)

| atom  | atom  | atom  | atom  | angle       | atom  | atom  | atom  | atom  | angle       |
|-------|-------|-------|-------|-------------|-------|-------|-------|-------|-------------|
| F(11) | F(13) | F(7)  | C(85) | 29.858(9)   | F(11) | F(13) | F(12) | C(85) | -39.754(8)  |
| F(11) | F(13) | C(85) | F(12) | 30.4783(6)  | F(11) | F(13) | C(85) | C(83) | 119.5(6)    |
| F(11) | C(85) | F(7)  | F(13) | -46.228(2)  | F(11) | C(85) | F(12) | F(13) | 138.115(7)  |
| F(11) | C(85) | F(13) | F(12) | -30.4783(6) | F(11) | C(85) | C(83) | O(10) | -14(1)      |
| F(11) | C(85) | C(83) | C(82) | 160.4(9)    | F(12) | F(11) | F(10) | C(85) | 3.2         |
| F(12) | F(11) | F(13) | C(85) | -125.257(2) | F(12) | F(11) | C(85) | F(13) | 24.629(7)   |
| F(12) | F(11) | C(85) | C(83) | -87.5(6)    | F(12) | F(13) | F(7)  | C(85) | 13.435(4)   |
| F(12) | F(13) | F(11) | C(85) | 125.257(2)  | F(12) | F(13) | C(85) | C(83) | 89.0(6)     |
| F(12) | C(85) | F(7)  | F(13) | -5.4746(6)  | F(12) | C(85) | F(11) | F(13) | -24.629(7)  |
| F(12) | C(85) | C(83) | O(10) | -65(1)      | F(12) | C(85) | C(83) | C(82) | 108(1)      |
| F(13) | F(7)  | F(8)  | C(85) | 28.4812(5)  | F(13) | F(7)  | F(9)  | C(85) | 25.7121(3)  |
| F(13) | F(7)  | C(85) | C(83) | 104.9(5)    | F(13) | F(11) | F(10) | C(85) | -19.9386(7) |
| F(13) | F(11) | F(12) | C(85) | 42.574(3)   | F(13) | F(11) | C(85) | C(83) | -112.2(6)   |
| F(13) | F(12) | F(11) | C(85) | -42.574(3)  | F(13) | F(12) | C(85) | C(83) | -106.2(6)   |
| F(13) | C(85) | C(83) | O(10) | -106(1)     | F(13) | C(85) | C(83) | C(82) | 68(1)       |
| F(14) | F(15) | F(16) | F(17) | 19.779(2)   | F(14) | F(15) | F(16) | C(89) | -17.623(1)  |
| F(14) | F(15) | C(89) | F(16) | 165.892(1)  | F(14) | F(15) | C(89) | F(17) | 127.09(1)   |
| F(14) | F(15) | C(89) | F(18) | 99.67(2)    | F(14) | F(15) | C(89) | F(19) | 22.490(2)   |
| F(14) | F(15) | C(89) | F(20) | 5.2353(1)   | F(14) | F(15) | C(89) | C(86) | -106.3(5)   |
| F(14) | F(16) | F(15) | C(89) | 17.623(1)   | F(14) | F(16) | F(17) | F(18) | -27.501(6)  |
| F(14) | F(16) | F(17) | C(89) | -35.627(8)  | F(14) | F(16) | C(89) | F(15) | -9.3841(1)  |
| F(14) | F(16) | C(89) | F(17) | 129.029(6)  | F(14) | F(16) | C(89) | F(18) | 124.617(7)  |
| F(14) | F(16) | C(89) | F(19) | 57.400(8)   | F(14) | F(16) | C(89) | F(20) | 16.044(1)   |
| F(14) | F(16) | C(89) | C(86) | -117.2(5)   | F(14) | F(19) | F(18) | F(17) | -2.5654(1)  |

Table 5. Torsion Angles(°) (continued)

| atom  | atom  | atom  | atom  | angle        | atom  | atom  | atom  | atom  | angle        |
|-------|-------|-------|-------|--------------|-------|-------|-------|-------|--------------|
| F(14) | F(19) | F(18) | C(89) | 29.956(2)    | F(14) | F(19) | F(20) | C(89) | -29.317(2)   |
| F(14) | F(19) | C(89) | F(15) | -15.045(3)   | F(14) | F(19) | C(89) | F(16) | -58.72(1)    |
| F(14) | F(19) | C(89) | F(17) | -121.387(4)  | F(14) | F(19) | C(89) | F(18) | -139.8257(5) |
| F(14) | F(19) | C(89) | F(20) | 19.716(2)    | F(14) | F(19) | C(89) | C(86) | 115.8(5)     |
| F(14) | F(20) | F(19) | F(18) | 6.1604(9)    | F(14) | F(20) | F(19) | C(89) | 29.317(2)    |
| F(14) | F(20) | C(89) | F(15) | -4.6058(8)   | F(14) | F(20) | C(89) | F(16) | -21.321(4)   |
| F(14) | F(20) | C(89) | F(17) | -107.425(3)  | F(14) | F(20) | C(89) | F(18) | -135.806(5)  |
| F(14) | F(20) | C(89) | F(19) | -154.055(4)  | F(14) | F(20) | C(89) | C(86) | 110.8(5)     |
| F(14) | C(89) | F(15) | F(16) | -165.892(1)  | F(14) | C(89) | F(16) | F(15) | 9.3841(1)    |
| F(14) | C(89) | F(16) | F(17) | -129.029(6)  | F(14) | C(89) | F(17) | F(16) | 65.6462(4)   |
| F(14) | C(89) | F(17) | F(18) | -107.5882(5) | F(14) | C(89) | F(18) | F(17) | 99.446(2)    |
| F(14) | C(89) | F(18) | F(19) | -50.512(3)   | F(14) | C(89) | F(19) | F(18) | 139.8257(5)  |
| F(14) | C(89) | F(19) | F(20) | -19.716(2)   | F(14) | C(89) | F(20) | F(19) | 154.055(4)   |
| F(14) | C(89) | C(86) | O(11) | -1(1)        | F(14) | C(89) | C(86) | C(87) | 178.7(9)     |
| F(15) | F(14) | F(16) | F(17) | -162.018(2)  | F(15) | F(14) | F(16) | C(89) | 157.551(3)   |
| F(15) | F(14) | F(19) | F(18) | -11.341(2)   | F(15) | F(14) | F(19) | F(20) | 163.939(3)   |
| F(15) | F(14) | F(19) | C(89) | 22.4761(4)   | F(15) | F(14) | F(20) | F(19) | -21.641(3)   |
| F(15) | F(14) | F(20) | C(89) | 10.1850(2)   | F(15) | F(14) | C(89) | F(16) | -9.5         |
| F(15) | F(14) | C(89) | F(17) | -67.84(1)    | F(15) | F(14) | C(89) | F(18) | -114.70(1)   |
| F(15) | F(14) | C(89) | F(19) | -159.596(3)  | F(15) | F(14) | C(89) | F(20) | -173.0518(5) |
| F(15) | F(14) | C(89) | C(86) | 94.9(5)      | F(15) | F(16) | F(14) | F(19) | 179.1384(1)  |
| F(15) | F(16) | F(14) | F(20) | -174.5681(6) | F(15) | F(16) | F(14) | C(89) | -157.551(3)  |
| F(15) | F(16) | F(17) | F(18) | -35.355(6)   | F(15) | F(16) | F(17) | C(89) | -43.481(9)   |
| F(15) | F(16) | C(89) | F(17) | 138.413(6)   | F(15) | F(16) | C(89) | F(18) | 134.001(7)   |

Table 5. Torsion Angles(°) (continued)

| atom  | atom  | atom  | atom  | angle        | atom  | atom  | atom  | atom  | angle        |
|-------|-------|-------|-------|--------------|-------|-------|-------|-------|--------------|
| F(15) | F(16) | C(89) | F(19) | 66.784(8)    | F(15) | F(16) | C(89) | F(20) | 25.428(1)    |
| F(15) | F(16) | C(89) | C(86) | -107.9(5)    | F(15) | C(89) | F(14) | F(16) | 9.5          |
| F(15) | C(89) | F(14) | F(19) | 159.596(3)   | F(15) | C(89) | F(14) | F(20) | 173.0518(5)  |
| F(15) | C(89) | F(16) | F(17) | -138.413(6)  | F(15) | C(89) | F(17) | F(16) | 26.9085(4)   |
| F(15) | C(89) | F(17) | F(18) | -146.3259(6) | F(15) | C(89) | F(18) | F(17) | 46.290(6)    |
| F(15) | C(89) | F(18) | F(19) | -103.67(1)   | F(15) | C(89) | F(19) | F(18) | 124.781(4)   |
| F(15) | C(89) | F(19) | F(20) | -34.761(6)   | F(15) | C(89) | F(20) | F(19) | 149.450(5)   |
| F(15) | C(89) | C(86) | O(11) | 44(1)        | F(15) | C(89) | C(86) | C(87) | -135(1)      |
| F(16) | F(14) | F(15) | C(89) | -17.600(2)   | F(16) | F(14) | F(19) | F(18) | -11.748(2)   |
| F(16) | F(14) | F(19) | F(20) | 163.532(3)   | F(16) | F(14) | F(19) | C(89) | 22.0690(4)   |
| F(16) | F(14) | F(20) | F(19) | -18.223(3)   | F(16) | F(14) | F(20) | C(89) | 13.6         |
| F(16) | F(14) | C(89) | F(17) | -58.37(1)    | F(16) | F(14) | C(89) | F(18) | -105.23(1)   |
| F(16) | F(14) | C(89) | F(19) | -150.126(3)  | F(16) | F(14) | C(89) | F(20) | -163.5813(6) |
| F(16) | F(14) | C(89) | C(86) | 104.4(5)     | F(16) | F(15) | F(14) | F(19) | -1.0         |
| F(16) | F(15) | F(14) | F(20) | 7.5665(5)    | F(16) | F(15) | F(14) | C(89) | 17.600(2)    |
| F(16) | F(15) | C(89) | F(17) | -38.80(1)    | F(16) | F(15) | C(89) | F(18) | -66.22(2)    |
| F(16) | F(15) | C(89) | F(19) | -143.402(1)  | F(16) | F(15) | C(89) | F(20) | -160.657(1)  |
| F(16) | F(15) | C(89) | C(86) | 87.8(5)      | F(16) | F(17) | F(18) | F(19) | 22.301(4)    |
| F(16) | F(17) | F(18) | C(89) | -7.012(2)    | F(16) | F(17) | C(89) | F(18) | 173.2344(1)  |
| F(16) | F(17) | C(89) | F(19) | 146.3571(5)  | F(16) | F(17) | C(89) | F(20) | 123.9154(6)  |
| F(16) | F(17) | C(89) | C(86) | -97.2(5)     | F(16) | C(89) | F(14) | F(19) | 150.126(3)   |
| F(16) | C(89) | F(14) | F(20) | 163.5813(6)  | F(16) | C(89) | F(17) | F(18) | -173.2344(1) |
| F(16) | C(89) | F(18) | F(17) | 6.544(1)     | F(16) | C(89) | F(18) | F(19) | -143.414(7)  |
| F(16) | C(89) | F(19) | F(18) | 81.11(1)     | F(16) | C(89) | F(19) | F(20) | -78.43(1)    |

Table 5. Torsion Angles(°) (continued)

| atom  | atom  | atom  | atom  | angle       | atom  | atom  | atom  | atom  | angle       |
|-------|-------|-------|-------|-------------|-------|-------|-------|-------|-------------|
| F(16) | C(89) | F(20) | F(19) | 132.734(8)  | F(16) | C(89) | C(86) | O(11) | 88.7(10)    |
| F(16) | C(89) | C(86) | C(87) | -90(1)      | F(17) | F(16) | F(14) | F(19) | 17.120(2)   |
| F(17) | F(16) | F(14) | F(20) | 23.414(2)   | F(17) | F(16) | F(14) | C(89) | 40.430(4)   |
| F(17) | F(16) | F(15) | C(89) | 37.402(4)   | F(17) | F(16) | C(89) | F(18) | -4.4111(8)  |
| F(17) | F(16) | C(89) | F(19) | -71.629(2)  | F(17) | F(16) | C(89) | F(20) | -112.984(5) |
| F(17) | F(16) | C(89) | C(86) | 113.7(5)    | F(17) | F(18) | F(19) | F(20) | -5.8461(3)  |
| F(17) | F(18) | F(19) | C(89) | -32.521(2)  | F(17) | F(18) | C(89) | F(19) | 149.958(5)  |
| F(17) | F(18) | C(89) | F(20) | 139.465(6)  | F(17) | F(18) | C(89) | C(86) | -108.3(5)   |
| F(17) | C(89) | F(14) | F(19) | 91.756(9)   | F(17) | C(89) | F(14) | F(20) | 105.21(1)   |
| F(17) | C(89) | F(18) | F(19) | -149.958(5) | F(17) | C(89) | F(19) | F(18) | 18.438(4)   |
| F(17) | C(89) | F(19) | F(20) | -141.104(6) | F(17) | C(89) | F(20) | F(19) | 46.631(1)   |
| F(17) | C(89) | C(86) | O(11) | 161.9(8)    | F(17) | C(89) | C(86) | C(87) | -17(1)      |
| F(18) | F(17) | F(16) | C(89) | 8.126(2)    | F(18) | F(17) | C(89) | F(19) | -26.8774(4) |
| F(18) | F(17) | C(89) | F(20) | -49.3191(4) | F(18) | F(17) | C(89) | C(86) | 89.6(5)     |
| F(18) | F(19) | F(14) | F(20) | -175.280(1) | F(18) | F(19) | F(14) | C(89) | -33.817(1)  |
| F(18) | F(19) | F(20) | C(89) | -23.1564(7) | F(18) | F(19) | C(89) | F(20) | 159.542(2)  |
| F(18) | F(19) | C(89) | C(86) | -104.3(5)   | F(18) | C(89) | F(14) | F(19) | 44.90(1)    |
| F(18) | C(89) | F(14) | F(20) | 58.35(1)    | F(18) | C(89) | F(19) | F(20) | -159.542(2) |
| F(18) | C(89) | F(20) | F(19) | 18.249(1)   | F(18) | C(89) | C(86) | O(11) | -156.1(8)   |
| F(18) | C(89) | C(86) | C(87) | 24(1)       | F(19) | F(14) | F(15) | C(89) | -18.592(2)  |
| F(19) | F(14) | F(16) | C(89) | -23.310(3)  | F(19) | F(14) | F(20) | C(89) | 31.826(3)   |
| F(19) | F(14) | C(89) | F(20) | -13.456(2)  | F(19) | F(14) | C(89) | C(86) | -105.5(5)   |
| F(19) | F(18) | F(17) | C(89) | 29.313(5)   | F(19) | F(18) | C(89) | F(20) | -10.4926(7) |
| F(19) | F(18) | C(89) | C(86) | 101.7(5)    | F(19) | F(20) | F(14) | C(89) | -31.826(3)  |

Table 5. Torsion Angles(°) (continued)

| atom  | atom  | atom  | atom  | angle        | atom  | atom  | atom  | atom  | angle       |
|-------|-------|-------|-------|--------------|-------|-------|-------|-------|-------------|
| F(19) | F(20) | C(89) | C(86) | -95.2(5)     | F(19) | C(89) | F(14) | F(20) | 13.456(2)   |
| F(19) | C(89) | C(86) | O(11) | -87(1)       | F(19) | C(89) | C(86) | C(87) | 92(1)       |
| F(20) | F(14) | F(15) | C(89) | -10.034(1)   | F(20) | F(14) | F(16) | C(89) | -17.017(2)  |
| F(20) | F(14) | F(19) | C(89) | -141.463(3)  | F(20) | F(14) | C(89) | C(86) | -92.1(5)    |
| F(20) | F(19) | F(14) | C(89) | 141.463(3)   | F(20) | F(19) | F(18) | C(89) | 26.675(2)   |
| F(20) | F(19) | C(89) | C(86) | 96.1(5)      | F(20) | C(89) | C(86) | O(11) | -54(1)      |
| F(20) | C(89) | C(86) | C(87) | 125(1)       | F(21) | F(22) | F(23) | F(24) | 23.235(4)   |
| F(21) | F(22) | F(23) | C(90) | -15.7116(4)  | F(21) | F(22) | C(90) | F(23) | 162.284(3)  |
| F(21) | F(22) | C(90) | F(24) | 124.00(1)    | F(21) | F(22) | C(90) | F(25) | 100.73(1)   |
| F(21) | F(22) | C(90) | F(26) | 12.669(1)    | F(21) | F(22) | C(90) | F(27) | -2.4944(4)  |
| F(21) | F(22) | C(90) | C(88) | -112.7(6)    | F(21) | F(26) | F(25) | F(24) | 10.4506(8)  |
| F(21) | F(26) | F(25) | C(90) | 35.435(6)    | F(21) | F(26) | F(27) | C(90) | -28.4229(9) |
| F(21) | F(26) | C(90) | F(22) | -14.603(1)   | F(21) | F(26) | C(90) | F(23) | -80.705(8)  |
| F(21) | F(26) | C(90) | F(24) | -117.991(5)  | F(21) | F(26) | C(90) | F(25) | -135.261(2) |
| F(21) | F(26) | C(90) | F(27) | 17.0595(2)   | F(21) | F(26) | C(90) | C(88) | 112.8(7)    |
| F(21) | F(27) | F(26) | F(25) | -0.7066(1)   | F(21) | F(27) | F(26) | C(90) | 28.4229(9)  |
| F(21) | F(27) | C(90) | F(22) | 5.1676(6)    | F(21) | F(27) | C(90) | F(23) | -15.454(3)  |
| F(21) | F(27) | C(90) | F(24) | -91.41(1)    | F(21) | F(27) | C(90) | F(25) | -121.844(7) |
| F(21) | F(27) | C(90) | F(26) | -148.1197(4) | F(21) | F(27) | C(90) | C(88) | 118.7(7)    |
| F(21) | C(90) | F(22) | F(23) | -162.284(3)  | F(21) | C(90) | F(23) | F(22) | 18.748(4)   |
| F(21) | C(90) | F(23) | F(24) | -111.054(2)  | F(21) | C(90) | F(24) | F(23) | 103.115(9)  |
| F(21) | C(90) | F(24) | F(25) | -83.84(1)    | F(21) | C(90) | F(25) | F(24) | 116.098(3)  |
| F(21) | C(90) | F(25) | F(26) | -37.564(2)   | F(21) | C(90) | F(26) | F(25) | 135.261(2)  |
| F(21) | C(90) | F(26) | F(27) | -17.0595(2)  | F(21) | C(90) | F(27) | F(26) | 148.1197(4) |

Table 5. Torsion Angles(°) (continued)

| atom  | atom  | atom  | atom  | angle        | atom  | atom  | atom  | atom  | angle        |
|-------|-------|-------|-------|--------------|-------|-------|-------|-------|--------------|
| F(21) | C(90) | C(88) | O(12) | -41(1)       | F(21) | C(90) | C(88) | C(87) | 137.6(10)    |
| F(22) | F(21) | F(26) | F(25) | -20.559(3)   | F(22) | F(21) | F(26) | F(27) | 160.001(3)   |
| F(22) | F(21) | F(26) | C(90) | 15.159(2)    | F(22) | F(21) | F(27) | F(26) | -47.038(8)   |
| F(22) | F(21) | F(27) | C(90) | -13.499(3)   | F(22) | F(21) | C(90) | F(23) | -15.690(2)   |
| F(22) | F(21) | C(90) | F(24) | -78.53(2)    | F(22) | F(21) | C(90) | F(25) | -121.38(1)   |
| F(22) | F(21) | C(90) | F(26) | -166.6634(4) | F(22) | F(21) | C(90) | F(27) | 174.4779(4)  |
| F(22) | F(21) | C(90) | C(88) | 103.0(7)     | F(22) | F(23) | F(24) | F(25) | -54.227(1)   |
| F(22) | F(23) | F(24) | C(90) | -40.871(1)   | F(22) | F(23) | C(90) | F(24) | 129.803(2)   |
| F(22) | F(23) | C(90) | F(25) | 134.255(1)   | F(22) | F(23) | C(90) | F(26) | 83.81(1)     |
| F(22) | F(23) | C(90) | F(27) | 26.565(6)    | F(22) | F(23) | C(90) | C(88) | -109.4(7)    |
| F(22) | C(90) | F(21) | F(26) | 166.6634(4)  | F(22) | C(90) | F(21) | F(27) | -174.4779(4) |
| F(22) | C(90) | F(23) | F(24) | -129.803(2)  | F(22) | C(90) | F(24) | F(23) | 37.070(4)    |
| F(22) | C(90) | F(24) | F(25) | -149.883(2)  | F(22) | C(90) | F(25) | F(24) | 38.068(2)    |
| F(22) | C(90) | F(25) | F(26) | -115.5942(7) | F(22) | C(90) | F(26) | F(25) | 120.658(1)   |
| F(22) | C(90) | F(26) | F(27) | -31.662(2)   | F(22) | C(90) | F(27) | F(26) | 153.287(1)   |
| F(22) | C(90) | C(88) | O(12) | 34(1)        | F(22) | C(90) | C(88) | C(87) | -146(1)      |
| F(23) | F(22) | F(21) | F(26) | 2.6761(2)    | F(23) | F(22) | F(21) | F(27) | 34.597(5)    |
| F(23) | F(22) | F(21) | C(90) | 19.228(2)    | F(23) | F(22) | C(90) | F(24) | -38.286(7)   |
| F(23) | F(22) | C(90) | F(25) | -61.557(7)   | F(23) | F(22) | C(90) | F(26) | -149.615(5)  |
| F(23) | F(22) | C(90) | F(27) | -164.779(3)  | F(23) | F(22) | C(90) | C(88) | 85.0(6)      |
| F(23) | F(24) | F(25) | F(26) | 35.682(2)    | F(23) | F(24) | F(25) | C(90) | 12.987(1)    |
| F(23) | F(24) | C(90) | F(25) | -173.048(1)  | F(23) | F(24) | C(90) | F(26) | 160.971(5)   |
| F(23) | F(24) | C(90) | F(27) | 135.287(10)  | F(23) | F(24) | C(90) | C(88) | -78.4(7)     |
| F(23) | C(90) | F(21) | F(26) | 150.973(2)   | F(23) | C(90) | F(21) | F(27) | 169.832(2)   |

Table 5. Torsion Angles(°) (continued)

| atom  | atom  | atom  | atom  | angle        | atom  | atom  | atom  | atom  | angle       |
|-------|-------|-------|-------|--------------|-------|-------|-------|-------|-------------|
| F(23) | C(90) | F(24) | F(25) | 173.048(1)   | F(23) | C(90) | F(25) | F(24) | -5.6        |
| F(23) | C(90) | F(25) | F(26) | -159.2696(7) | F(23) | C(90) | F(26) | F(25) | 54.556(6)   |
| F(23) | C(90) | F(26) | F(27) | -97.765(8)   | F(23) | C(90) | F(27) | F(26) | 132.666(3)  |
| F(23) | C(90) | C(88) | O(12) | 86(1)        | F(23) | C(90) | C(88) | C(87) | -93(1)      |
| F(24) | F(23) | F(22) | C(90) | 38.946(4)    | F(24) | F(23) | C(90) | F(25) | 4.452(1)    |
| F(24) | F(23) | C(90) | F(26) | -45.99(1)    | F(24) | F(23) | C(90) | F(27) | -103.238(4) |
| F(24) | F(23) | C(90) | C(88) | 120.8(7)     | F(24) | F(25) | F(26) | F(27) | 10.8093(8)  |
| F(24) | F(25) | F(26) | C(90) | -24.984(6)   | F(24) | F(25) | C(90) | F(26) | 153.6620(8) |
| F(24) | F(25) | C(90) | F(27) | 140.220(2)   | F(24) | F(25) | C(90) | C(88) | -107.2(6)   |
| F(24) | C(90) | F(21) | F(26) | 88.14(2)     | F(24) | C(90) | F(21) | F(27) | 107.00(2)   |
| F(24) | C(90) | F(25) | F(26) | -153.6620(8) | F(24) | C(90) | F(26) | F(25) | 17.270(3)   |
| F(24) | C(90) | F(26) | F(27) | -135.050(5)  | F(24) | C(90) | F(27) | F(26) | 56.71(1)    |
| F(24) | C(90) | C(88) | O(12) | 139.6(10)    | F(24) | C(90) | C(88) | C(87) | -40(1)      |
| F(25) | F(24) | F(23) | C(90) | -13.3554(1)  | F(25) | F(24) | C(90) | F(26) | -25.981(6)  |
| F(25) | F(24) | C(90) | F(27) | -51.67(1)    | F(25) | F(24) | C(90) | C(88) | 94.6(7)     |
| F(25) | F(26) | F(21) | F(27) | 179.4407(1)  | F(25) | F(26) | F(21) | C(90) | -35.718(4)  |
| F(25) | F(26) | F(27) | C(90) | -29.129(1)   | F(25) | F(26) | C(90) | F(27) | 152.320(3)  |
| F(25) | F(26) | C(90) | C(88) | -111.9(7)    | F(25) | C(90) | F(21) | F(26) | 45.28(1)    |
| F(25) | C(90) | F(21) | F(27) | 64.14(1)     | F(25) | C(90) | F(26) | F(27) | -152.320(3) |
| F(25) | C(90) | F(27) | F(26) | 26.275(6)    | F(25) | C(90) | C(88) | O(12) | -175.4(10)  |
| F(25) | C(90) | C(88) | C(87) | 4(1)         | F(26) | F(21) | F(22) | C(90) | -16.551(2)  |
| F(26) | F(21) | F(27) | C(90) | 33.539(6)    | F(26) | F(21) | C(90) | F(27) | -18.8588(1) |
| F(26) | F(21) | C(90) | C(88) | -90.4(7)     | F(26) | F(25) | F(24) | C(90) | 22.6955(6)  |
| F(26) | F(25) | C(90) | F(27) | -13.4415(8)  | F(26) | F(25) | C(90) | C(88) | 99.2(6)     |

Table 5. Torsion Angles(°) (continued)

| atom  | atom  | atom  | atom  | angle       | atom  | atom  | atom  | atom  | angle      |
|-------|-------|-------|-------|-------------|-------|-------|-------|-------|------------|
| F(26) | F(27) | F(21) | C(90) | -33.539(6)  | F(26) | F(27) | C(90) | C(88) | -93.2(7)   |
| F(26) | C(90) | F(21) | F(27) | 18.8588(1)  | F(26) | C(90) | C(88) | O(12) | -99(1)     |
| F(26) | C(90) | C(88) | C(87) | 80(1)       | F(27) | F(21) | F(22) | C(90) | 15.369(3)  |
| F(27) | F(21) | F(26) | C(90) | -144.841(4) | F(27) | F(21) | C(90) | C(88) | -71.5(7)   |
| F(27) | F(26) | F(21) | C(90) | 144.841(4)  | F(27) | F(26) | F(25) | C(90) | 35.793(6)  |
| F(27) | F(26) | C(90) | C(88) | 95.8(7)     | F(27) | C(90) | C(88) | O(12) | -68(1)     |
| F(27) | C(90) | C(88) | C(87) | 111(1)      | O(1)  | C(6)  | C(1)  | C(2)  | 179.3(9)   |
| O(1)  | C(6)  | C(1)  | C(33) | 0(1)        | O(1)  | C(6)  | C(5)  | C(4)  | -178.4(10) |
| O(1)  | C(6)  | C(5)  | C(7)  | 4(1)        | O(1)  | C(8)  | O(2)  | C(9)  | -94(1)     |
| O(2)  | C(8)  | O(1)  | C(6)  | 93(1)       | O(2)  | C(9)  | C(10) | C(11) | -176.9(9)  |
| O(2)  | C(9)  | C(10) | C(37) | -2(1)       | O(2)  | C(9)  | C(14) | C(7)  | -3(1)      |
| O(2)  | C(9)  | C(14) | C(13) | 178.8(9)    | O(3)  | C(11) | C(10) | C(9)  | 177.2(9)   |
| O(3)  | C(11) | C(10) | C(37) | 2(1)        | O(3)  | C(11) | C(12) | C(13) | -177.2(9)  |
| O(3)  | C(11) | C(12) | C(15) | 6(1)        | O(3)  | C(16) | O(4)  | C(17) | -89(1)     |
| O(4)  | C(16) | O(3)  | C(11) | 92(1)       | O(4)  | C(17) | C(18) | C(19) | -176.1(10) |
| O(4)  | C(17) | C(18) | C(41) | 3(1)        | O(4)  | C(17) | C(22) | C(15) | -7(1)      |
| O(4)  | C(17) | C(22) | C(21) | 175.6(9)    | O(5)  | C(19) | C(18) | C(17) | 173.7(10)  |
| O(5)  | C(19) | C(18) | C(41) | -6(1)       | O(5)  | C(19) | C(20) | C(21) | -176.9(9)  |
| O(5)  | C(19) | C(20) | C(23) | 5(1)        | O(5)  | C(24) | O(6)  | C(25) | -95(1)     |
| O(6)  | C(24) | O(5)  | C(19) | 90(1)       | O(6)  | C(25) | C(26) | C(27) | 178.9(9)   |
| O(6)  | C(25) | C(26) | C(45) | -2(1)       | O(6)  | C(25) | C(30) | C(23) | 0(1)       |
| O(6)  | C(25) | C(30) | C(29) | 179.6(9)    | O(7)  | C(27) | C(26) | C(25) | 178.4(9)   |
| O(7)  | C(27) | C(26) | C(45) | 0(1)        | O(7)  | C(27) | C(28) | C(29) | -177.4(9)  |
| O(7)  | C(27) | C(28) | C(31) | 3(1)        | O(7)  | C(32) | O(8)  | C(2)  | -91(1)     |

Table 5. Torsion Angles(°) (continued)

| atom  | atom  | atom  | atom  | angle       | atom  | atom   | atom  | atom   | angle       |
|-------|-------|-------|-------|-------------|-------|--------|-------|--------|-------------|
| O(8)  | C(2)  | C(1)  | C(6)  | -178.5(9)   | O(8)  | C(2)   | C(1)  | C(33)  | 0(1)        |
| O(8)  | C(2)  | C(3)  | C(4)  | 175.7(10)   | O(8)  | C(2)   | C(3)  | C(31)  | -5(1)       |
| O(8)  | C(32) | O(7)  | C(27) | 90(1)       | O(9)  | Mn(1)  | O(10) | C(83)  | -3(1)       |
| O(9)  | Mn(1) | O(11) | C(86) | 156(1)      | O(9)  | Mn(1)  | O(12) | C(88)  | -133(3)     |
| O(9)  | Mn(1) | N(5)  | C(42) | -140.9(9)   | O(9)  | Mn(1)  | N(5)  | C(43)  | 39.9(10)    |
| O(9)  | C(81) | C(82) | C(83) | -1(2)       | O(10) | Mn(1)  | O(9)  | C(81)  | 0(1)        |
| O(10) | Mn(1) | O(11) | C(86) | 0(3)        | O(10) | Mn(1)  | O(12) | C(88)  | -153(1)     |
| O(10) | Mn(1) | N(5)  | C(42) | -56.2(9)    | O(10) | Mn(1)  | N(5)  | C(43)  | 124.6(10)   |
| O(10) | C(83) | C(82) | C(81) | -3(2)       | O(11) | Mn(1)  | O(9)  | C(81)  | -177(1)     |
| O(11) | Mn(1) | O(10) | C(83) | 151(2)      | O(11) | Mn(1)  | O(12) | C(88)  | 24(1)       |
| O(11) | Mn(1) | N(5)  | C(42) | 117.5(9)    | O(11) | Mn(1)  | N(5)  | C(43)  | -61.6(10)   |
| O(11) | C(86) | C(87) | C(88) | 0(2)        | O(12) | Mn(1)  | O(9)  | C(81)  | -21(3)      |
| O(12) | Mn(1) | O(10) | C(83) | 174(1)      | O(12) | Mn(1)  | O(11) | C(86)  | -21(1)      |
| O(12) | Mn(1) | N(5)  | C(42) | 33.7(9)     | O(12) | Mn(1)  | N(5)  | C(43)  | -145.5(10)  |
| O(12) | C(88) | C(87) | C(86) | 3(2)        | O(13) | C(92)  | O(14) | C(93)  | -5(2)       |
| O(15) | C(96) | O(16) | C(97) | -12.5334(9) | O(17) | C(100) | O(18) | C(101) | 172.7004(3) |
| N(1)  | C(34) | C(33) | C(1)  | 178(1)      | N(1)  | C(34)  | C(33) | C(36)  | -1(1)       |
| N(1)  | C(35) | N(2)  | C(36) | 0(1)        | N(2)  | C(35)  | N(1)  | C(34)  | 0(1)        |
| N(2)  | C(36) | C(33) | C(1)  | -179(1)     | N(2)  | C(36)  | C(33) | C(34)  | 0(1)        |
| N(3)  | C(38) | C(37) | C(10) | -179(1)     | N(3)  | C(38)  | C(37) | C(40)  | 0(1)        |
| N(3)  | C(39) | N(4)  | C(40) | 0(2)        | N(4)  | C(39)  | N(3)  | C(38)  | -1(2)       |
| N(4)  | C(40) | C(37) | C(10) | 178(1)      | N(4)  | C(40)  | C(37) | C(38)  | 0(1)        |
| N(5)  | Mn(1) | O(9)  | C(81) | 87(1)       | N(5)  | Mn(1)  | O(10) | C(83)  | -97(1)      |
| N(5)  | Mn(1) | O(11) | C(86) | -109(1)     | N(5)  | Mn(1)  | O(12) | C(88)  | 118(1)      |

Table 5. Torsion Angles(°) (continued)

| atom | atom  | atom  | atom  | angle      | atom | atom  | atom  | atom  | angle      |
|------|-------|-------|-------|------------|------|-------|-------|-------|------------|
| N(5) | C(42) | C(41) | C(18) | 178(1)     | N(5) | C(42) | C(41) | C(44) | 1(1)       |
| N(5) | C(43) | N(6)  | C(44) | 1(2)       | N(6) | C(43) | N(5)  | C(42) | 0(1)       |
| N(6) | C(44) | C(41) | C(18) | -176(1)    | N(6) | C(44) | C(41) | C(42) | 0(1)       |
| N(7) | C(46) | C(45) | C(26) | 179(1)     | N(7) | C(46) | C(45) | C(48) | 0(2)       |
| N(7) | C(47) | N(8)  | C(48) | 3(2)       | N(8) | C(47) | N(7)  | C(46) | -4(2)      |
| N(8) | C(48) | C(45) | C(26) | -179(1)    | N(8) | C(48) | C(45) | C(46) | 0(2)       |
| C(1) | C(2)  | O(8)  | C(32) | -101(1)    | C(1) | C(2)  | C(3)  | C(4)  | 0(1)       |
| C(1) | C(2)  | C(3)  | C(31) | 178(1)     | C(1) | C(6)  | O(1)  | C(8)  | 104(1)     |
| C(1) | C(6)  | C(5)  | C(4)  | -3(1)      | C(1) | C(6)  | C(5)  | C(7)  | 179.1(10)  |
| C(2) | C(1)  | C(6)  | C(5)  | 4(1)       | C(2) | C(1)  | C(33) | C(34) | 122(1)     |
| C(2) | C(1)  | C(33) | C(36) | -56(1)     | C(2) | C(3)  | C(4)  | C(5)  | 0(1)       |
| C(2) | C(3)  | C(31) | C(28) | -86(1)     | C(2) | C(3)  | C(31) | C(73) | 146.3(10)  |
| C(3) | C(2)  | O(8)  | C(32) | 82(1)      | C(3) | C(2)  | C(1)  | C(6)  | -2(1)      |
| C(3) | C(2)  | C(1)  | C(33) | 175(1)     | C(3) | C(4)  | C(5)  | C(6)  | 1(1)       |
| C(3) | C(4)  | C(5)  | C(7)  | 177(1)     | C(3) | C(31) | C(28) | C(27) | 86(1)      |
| C(3) | C(31) | C(28) | C(29) | -92(1)     | C(3) | C(31) | C(73) | C(74) | -173.0(9)  |
| C(4) | C(3)  | C(31) | C(28) | 92(1)      | C(4) | C(3)  | C(31) | C(73) | -34(1)     |
| C(4) | C(5)  | C(7)  | C(14) | -89(1)     | C(4) | C(5)  | C(7)  | C(49) | 38(1)      |
| C(5) | C(4)  | C(3)  | C(31) | -178(1)    | C(5) | C(6)  | O(1)  | C(8)  | -80(1)     |
| C(5) | C(6)  | C(1)  | C(33) | -173(1)    | C(5) | C(7)  | C(14) | C(9)  | -88(1)     |
| C(5) | C(7)  | C(14) | C(13) | 89(1)      | C(5) | C(7)  | C(49) | C(50) | 66(1)      |
| C(6) | C(1)  | C(33) | C(34) | -59(1)     | C(6) | C(1)  | C(33) | C(36) | 121(1)     |
| C(6) | C(5)  | C(7)  | C(14) | 87(1)      | C(6) | C(5)  | C(7)  | C(49) | -145.2(10) |
| C(7) | C(14) | C(9)  | C(10) | -179.6(10) | C(7) | C(14) | C(13) | C(12) | 179.7(10)  |

Table 5. Torsion Angles(°) (continued)

| atom  | atom  | atom  | atom  | angle     | atom  | atom  | atom  | atom  | angle      |
|-------|-------|-------|-------|-----------|-------|-------|-------|-------|------------|
| C(7)  | C(49) | C(50) | C(51) | 62(1)     | C(8)  | O(2)  | C(9)  | C(10) | -102(1)    |
| C(8)  | O(2)  | C(9)  | C(14) | 80(1)     | C(9)  | C(10) | C(11) | C(12) | -1(1)      |
| C(9)  | C(10) | C(37) | C(38) | 71(1)     | C(9)  | C(10) | C(37) | C(40) | -106(1)    |
| C(9)  | C(14) | C(7)  | C(49) | 144.0(10) | C(9)  | C(14) | C(13) | C(12) | -2(1)      |
| C(10) | C(9)  | C(14) | C(13) | 2(1)      | C(10) | C(11) | O(3)  | C(16) | 96(1)      |
| C(10) | C(11) | C(12) | C(13) | 1(1)      | C(10) | C(11) | C(12) | C(15) | -174.4(10) |
| C(11) | C(10) | C(9)  | C(14) | 0(1)      | C(11) | C(10) | C(37) | C(38) | -113(1)    |
| C(11) | C(10) | C(37) | C(40) | 67(1)     | C(11) | C(12) | C(13) | C(14) | 0(1)       |
| C(11) | C(12) | C(15) | C(22) | 83(1)     | C(11) | C(12) | C(15) | C(57) | -149.3(10) |
| C(12) | C(11) | O(3)  | C(16) | -85(1)    | C(12) | C(11) | C(10) | C(37) | -176.5(10) |
| C(12) | C(15) | C(22) | C(17) | -83(1)    | C(12) | C(15) | C(22) | C(21) | 93(1)      |
| C(12) | C(15) | C(57) | C(58) | 62(1)     | C(13) | C(12) | C(15) | C(22) | -92(1)     |
| C(13) | C(12) | C(15) | C(57) | 35(1)     | C(13) | C(14) | C(7)  | C(49) | -38(1)     |
| C(14) | C(7)  | C(49) | C(50) | -168.3(8) | C(14) | C(9)  | C(10) | C(37) | 174(1)     |
| C(14) | C(13) | C(12) | C(15) | 176.4(10) | C(15) | C(22) | C(17) | C(18) | 173.1(10)  |
| C(15) | C(22) | C(21) | C(20) | -176(1)   | C(15) | C(57) | C(58) | C(59) | -176.3(9)  |
| C(16) | O(4)  | C(17) | C(18) | -97(1)    | C(16) | O(4)  | C(17) | C(22) | 82(1)      |
| C(17) | C(18) | C(19) | C(20) | 0(1)      | C(17) | C(18) | C(41) | C(42) | -56(1)     |
| C(17) | C(18) | C(41) | C(44) | 120(1)    | C(17) | C(22) | C(15) | C(57) | 149(1)     |
| C(17) | C(22) | C(21) | C(20) | 0(1)      | C(18) | C(17) | C(22) | C(21) | -4(1)      |
| C(18) | C(19) | O(5)  | C(24) | 107(1)    | C(18) | C(19) | C(20) | C(21) | -3(1)      |
| C(18) | C(19) | C(20) | C(23) | 178(1)    | C(19) | C(18) | C(17) | C(22) | 3(1)       |
| C(19) | C(18) | C(41) | C(42) | 123(1)    | C(19) | C(18) | C(41) | C(44) | -59(1)     |
| C(19) | C(20) | C(21) | C(22) | 3(1)      | C(19) | C(20) | C(23) | C(30) | 85(1)      |

Table 5. Torsion Angles(°) (continued)

| atom  | atom  | atom  | atom  | angle      | atom  | atom  | atom  | atom  | angle      |
|-------|-------|-------|-------|------------|-------|-------|-------|-------|------------|
| C(19) | C(20) | C(23) | C(65) | -147(1)    | C(20) | C(19) | O(5)  | C(24) | -78(1)     |
| C(20) | C(19) | C(18) | C(41) | -179(1)    | C(20) | C(23) | C(30) | C(25) | -89(1)     |
| C(20) | C(23) | C(30) | C(29) | 90(1)      | C(20) | C(23) | C(65) | C(66) | 61(1)      |
| C(21) | C(20) | C(23) | C(30) | -92(1)     | C(21) | C(20) | C(23) | C(65) | 34(1)      |
| C(21) | C(22) | C(15) | C(57) | -33(1)     | C(22) | C(15) | C(57) | C(58) | -173.6(9)  |
| C(22) | C(17) | C(18) | C(41) | -176.5(10) | C(22) | C(21) | C(20) | C(23) | -179.5(10) |
| C(23) | C(30) | C(25) | C(26) | 178.5(10)  | C(23) | C(30) | C(29) | C(28) | -177.6(10) |
| C(23) | C(65) | C(66) | C(67) | -171.0(10) | C(24) | O(6)  | C(25) | C(26) | -96(1)     |
| C(24) | O(6)  | C(25) | C(30) | 81(1)      | C(25) | C(26) | C(27) | C(28) | 0(1)       |
| C(25) | C(26) | C(45) | C(46) | -81(1)     | C(25) | C(26) | C(45) | C(48) | 97(1)      |
| C(25) | C(30) | C(23) | C(65) | 144(1)     | C(25) | C(30) | C(29) | C(28) | 3(1)       |
| C(26) | C(25) | C(30) | C(29) | -2(1)      | C(26) | C(27) | O(7)  | C(32) | 102(1)     |
| C(26) | C(27) | C(28) | C(29) | 0(1)       | C(26) | C(27) | C(28) | C(31) | -178.0(10) |
| C(27) | C(26) | C(25) | C(30) | 0(1)       | C(27) | C(26) | C(45) | C(46) | 96(1)      |
| C(27) | C(26) | C(45) | C(48) | -83(1)     | C(27) | C(28) | C(29) | C(30) | -2(1)      |
| C(27) | C(28) | C(31) | C(73) | -145.5(10) | C(28) | C(27) | O(7)  | C(32) | -79(1)     |
| C(28) | C(27) | C(26) | C(45) | -178.7(10) | C(28) | C(31) | C(73) | C(74) | 63(1)      |
| C(29) | C(28) | C(31) | C(73) | 35(1)      | C(29) | C(30) | C(23) | C(65) | -34(1)     |
| C(30) | C(23) | C(65) | C(66) | -175.0(9)  | C(30) | C(25) | C(26) | C(45) | 179(1)     |
| C(30) | C(29) | C(28) | C(31) | 176.4(10)  | C(31) | C(73) | C(74) | C(75) | 61(1)      |
| C(33) | C(34) | N(1)  | C(35) | 1(1)       | C(33) | C(36) | N(2)  | C(35) | 0(1)       |
| C(37) | C(38) | N(3)  | C(39) | 1(1)       | C(37) | C(40) | N(4)  | C(39) | 1(2)       |
| C(41) | C(42) | N(5)  | C(43) | -1(1)      | C(41) | C(44) | N(6)  | C(43) | -1(1)      |
| C(45) | C(46) | N(7)  | C(47) | 1(2)       | C(45) | C(48) | N(8)  | C(47) | -1(2)      |

Table 5. Torsion Angles(°) (continued)

| atom  | atom  | atom  | atom  | angle       | atom  | atom  | atom  | atom  | angle      |
|-------|-------|-------|-------|-------------|-------|-------|-------|-------|------------|
| C(49) | C(50) | C(51) | C(52) | -107(1)     | C(49) | C(50) | C(51) | C(56) | 71(1)      |
| C(50) | C(51) | C(52) | C(53) | -179(1)     | C(50) | C(51) | C(56) | C(55) | 178(1)     |
| C(51) | C(52) | C(53) | C(54) | 0(2)        | C(51) | C(56) | C(55) | C(54) | 1(2)       |
| C(52) | C(51) | C(56) | C(55) | -3(1)       | C(52) | C(53) | C(54) | C(55) | -1(2)      |
| C(53) | C(52) | C(51) | C(56) | 2(1)        | C(53) | C(54) | C(55) | C(56) | 1(2)       |
| C(57) | C(58) | C(59) | C(60) | 118(1)      | C(57) | C(58) | C(59) | C(64) | -59(1)     |
| C(58) | C(59) | C(60) | C(61) | -179(1)     | C(58) | C(59) | C(64) | C(63) | -179(1)    |
| C(59) | C(60) | C(61) | C(62) | 0(2)        | C(59) | C(64) | C(63) | C(62) | -2(2)      |
| C(60) | C(59) | C(64) | C(63) | 1(1)        | C(60) | C(61) | C(62) | C(63) | 0(2)       |
| C(61) | C(60) | C(59) | C(64) | 0(2)        | C(61) | C(62) | C(63) | C(64) | 1(2)       |
| C(65) | C(66) | C(67) | C(68) | 69(1)       | C(65) | C(66) | C(67) | C(72) | -106(1)    |
| C(66) | C(67) | C(68) | C(69) | -178(1)     | C(66) | C(67) | C(72) | C(71) | 179(1)     |
| C(67) | C(68) | C(69) | C(70) | 0(2)        | C(67) | C(72) | C(71) | C(70) | -2(2)      |
| C(68) | C(67) | C(72) | C(71) | 3(1)        | C(68) | C(69) | C(70) | C(71) | 1(2)       |
| C(69) | C(68) | C(67) | C(72) | -2(1)       | C(69) | C(70) | C(71) | C(72) | 0(2)       |
| C(73) | C(74) | C(75) | C(76) | -103(1)     | C(73) | C(74) | C(75) | C(80) | 76(1)      |
| C(74) | C(75) | C(76) | C(77) | 177(1)      | C(74) | C(75) | C(80) | C(79) | -179(1)    |
| C(75) | C(76) | C(77) | C(78) | 1(1)        | C(75) | C(80) | C(79) | C(78) | 4(1)       |
| C(76) | C(75) | C(80) | C(79) | 0(1)        | C(76) | C(77) | C(78) | C(79) | 2(1)       |
| C(77) | C(76) | C(75) | C(80) | -2(1)       | C(77) | C(78) | C(79) | C(80) | -4(2)      |
| C(81) | C(82) | C(83) | C(85) | -177(1)     | C(83) | C(82) | C(81) | C(84) | 176(1)     |
| C(86) | C(87) | C(88) | C(90) | -175(1)     | C(88) | C(87) | C(86) | C(89) | 179(1)     |
| C(91) | C(92) | O(14) | C(93) | 175(1)      | C(92) | O(14) | C(93) | C(94) | 179(2)     |
| C(95) | C(96) | O(16) | C(97) | 168.3615(9) | C(96) | O(16) | C(97) | C(98) | 175.419(1) |

Table 5. Torsion Angles(°) (continued)

| atom  | atom   | atom  | atom   | angle       | atom   | atom  | atom   | atom   | angle     |
|-------|--------|-------|--------|-------------|--------|-------|--------|--------|-----------|
| C(99) | C(100) | O(18) | C(101) | -14.5529(2) | C(100) | O(18) | C(101) | C(102) | 100.94(2) |

Table 6. Non-bonded Contacts out to 3.80 Å

| atom  | atom               | distance  | atom | atom                | distance  |
|-------|--------------------|-----------|------|---------------------|-----------|
| Mn(1) | H(21) <sup>1</sup> | 3.71      | F(1) | N(6) <sup>1</sup>   | 3.39(1)   |
| F(1)  | H(24) <sup>1</sup> | 3.52      | F(1) | N(3) <sup>2</sup>   | 3.63(1)   |
| F(1)  | C(43) <sup>1</sup> | 3.70(1)   | F(1) | C(39) <sup>2</sup>  | 3.74(1)   |
| F(1)  | H(21) <sup>2</sup> | 3.75      | F(2) | H(21) <sup>2</sup>  | 2.98      |
| F(2)  | C(39) <sup>2</sup> | 3.08(1)   | F(2) | H(24) <sup>1</sup>  | 3.11      |
| F(2)  | N(3) <sup>2</sup>  | 3.18(1)   | F(2) | C(43) <sup>1</sup>  | 3.40(1)   |
| F(2)  | N(6) <sup>1</sup>  | 3.40(1)   | F(2) | F(20) <sup>1</sup>  | 3.538(1)  |
| F(3)  | F(20) <sup>1</sup> | 2.5819(6) | F(3) | F(19) <sup>1</sup>  | 2.6617(8) |
| F(3)  | H(27) <sup>3</sup> | 2.85      | F(3) | H(21) <sup>2</sup>  | 3.23      |
| F(3)  | F(14) <sup>1</sup> | 3.4927(5) | F(3) | O(11) <sup>1</sup>  | 3.493(8)  |
| F(3)  | C(86) <sup>1</sup> | 3.59(1)   | F(3) | C(89) <sup>1</sup>  | 3.5886(8) |
| F(3)  | H(24) <sup>1</sup> | 3.70      | F(3) | C(39) <sup>2</sup>  | 3.75(1)   |
| F(3)  | C(47) <sup>3</sup> | 3.75(1)   | F(3) | C(43) <sup>1</sup>  | 3.80(1)   |
| F(4)  | H(27) <sup>3</sup> | 2.55      | F(4) | H(8) <sup>1</sup>   | 3.23      |
| F(4)  | F(19) <sup>1</sup> | 3.3509(7) | F(4) | C(47) <sup>3</sup>  | 3.37(1)   |
| F(4)  | F(20) <sup>1</sup> | 3.4482(5) | F(4) | N(7) <sup>3</sup>   | 3.52(1)   |
| F(4)  | H(7) <sup>1</sup>  | 3.73      | F(5) | N(3) <sup>1</sup>   | 3.24(1)   |
| F(5)  | H(20) <sup>1</sup> | 3.37      | F(5) | C(38) <sup>1</sup>  | 3.49(1)   |
| F(5)  | H(27) <sup>3</sup> | 3.52      | F(5) | H(7) <sup>1</sup>   | 3.71      |
| F(5)  | H(8) <sup>1</sup>  | 3.74      | F(6) | O(18) <sup>1</sup>  | 3.1412(2) |
| F(6)  | C(93) <sup>1</sup> | 3.63(3)   | F(6) | H(20) <sup>1</sup>  | 3.79      |
| F(7)  | O(2) <sup>2</sup>  | 2.842(7)  | F(7) | H(22) <sup>2</sup>  | 3.40      |
| F(7)  | C(40) <sup>2</sup> | 3.45(1)   | F(7) | C(102) <sup>1</sup> | 3.5235(6) |
| F(7)  | C(9) <sup>2</sup>  | 3.55(1)   | F(7) | C(37) <sup>2</sup>  | 3.65(1)   |

Table 6. Non-bonded Contacts out to 3.80 Å (continued)

| atom  | atom                 | distance  | atom  | atom                 | distance  |
|-------|----------------------|-----------|-------|----------------------|-----------|
| F(8)  | H(22) <sup>2)</sup>  | 2.77      | F(8)  | C(40) <sup>2)</sup>  | 3.01(1)   |
| F(8)  | O(2) <sup>2)</sup>   | 3.432(7)  | F(8)  | N(4) <sup>2)</sup>   | 3.48(1)   |
| F(8)  | C(37) <sup>2)</sup>  | 3.54(1)   | F(9)  | H(22) <sup>2)</sup>  | 2.86      |
| F(9)  | C(40) <sup>2)</sup>  | 3.24(1)   | F(9)  | N(4) <sup>2)</sup>   | 3.57(1)   |
| F(10) | H(43) <sup>4)</sup>  | 2.86      | F(10) | H(44) <sup>4)</sup>  | 3.46      |
| F(10) | C(61) <sup>4)</sup>  | 3.72(1)   | F(10) | C(98) <sup>4)</sup>  | 3.7940(7) |
| F(11) | H(43) <sup>4)</sup>  | 2.50      | F(11) | H(44) <sup>4)</sup>  | 2.88      |
| F(11) | C(61) <sup>4)</sup>  | 3.21(1)   | F(11) | C(62) <sup>4)</sup>  | 3.36(1)   |
| F(12) | H(44) <sup>4)</sup>  | 3.10      | F(12) | H(43) <sup>4)</sup>  | 3.17      |
| F(12) | H(36) <sup>2)</sup>  | 3.55      | F(12) | C(62) <sup>4)</sup>  | 3.63(1)   |
| F(12) | C(101) <sup>1)</sup> | 3.6320(5) | F(12) | C(102) <sup>1)</sup> | 3.6371(7) |
| F(12) | C(55) <sup>2)</sup>  | 3.65(1)   | F(12) | C(61) <sup>4)</sup>  | 3.68(1)   |
| F(12) | H(35) <sup>2)</sup>  | 3.72      | F(12) | C(54) <sup>2)</sup>  | 3.77(2)   |
| F(13) | C(102) <sup>1)</sup> | 3.1803(6) | F(13) | O(2) <sup>2)</sup>   | 3.422(7)  |
| F(13) | C(101) <sup>1)</sup> | 3.5052(3) | F(14) | H(21) <sup>1)</sup>  | 2.56      |
| F(14) | H(15) <sup>3)</sup>  | 2.76      | F(14) | N(4) <sup>1)</sup>   | 3.114(10) |
| F(14) | C(39) <sup>1)</sup>  | 3.21(1)   | F(14) | H(16) <sup>3)</sup>  | 3.37      |
| F(14) | C(32) <sup>3)</sup>  | 3.53(1)   | F(14) | N(8) <sup>3)</sup>   | 3.62(1)   |
| F(14) | H(28) <sup>3)</sup>  | 3.65      | F(14) | C(48) <sup>3)</sup>  | 3.75(2)   |
| F(15) | H(28) <sup>3)</sup>  | 3.02      | F(15) | H(21) <sup>1)</sup>  | 3.03      |
| F(15) | N(8) <sup>3)</sup>   | 3.09(1)   | F(15) | H(15) <sup>3)</sup>  | 3.14      |
| F(15) | C(48) <sup>3)</sup>  | 3.24(1)   | F(15) | H(16) <sup>3)</sup>  | 3.35      |
| F(15) | N(4) <sup>1)</sup>   | 3.560(10) | F(15) | C(39) <sup>1)</sup>  | 3.70(1)   |
| F(15) | C(32) <sup>3)</sup>  | 3.73(1)   | F(16) | H(28) <sup>3)</sup>  | 3.28      |

Table 6. Non-bonded Contacts out to 3.80 Å (continued)

| atom  | atom                | distance  | atom  | atom                 | distance |
|-------|---------------------|-----------|-------|----------------------|----------|
| F(16) | N(8) <sup>3)</sup>  | 3.49(1)   | F(16) | C(93) <sup>3)</sup>  | 3.50(3)  |
| F(16) | C(48) <sup>3)</sup> | 3.68(1)   | F(16) | C(94) <sup>3)</sup>  | 3.70(3)  |
| F(17) | C(99) <sup>3)</sup> | 3.2049(6) | F(17) | N(1) <sup>3)</sup>   | 3.36(1)  |
| F(17) | O(17) <sup>3)</sup> | 3.425(1)  | F(17) | C(100) <sup>3)</sup> | 3.481(1) |
| F(17) | C(34) <sup>3)</sup> | 3.76(1)   | F(18) | H(27) <sup>5)</sup>  | 3.00     |
| F(18) | N(1) <sup>3)</sup>  | 3.12(1)   | F(18) | C(47) <sup>5)</sup>  | 3.30(1)  |
| F(18) | C(35) <sup>3)</sup> | 3.44(1)   | F(18) | H(18) <sup>3)</sup>  | 3.47     |
| F(18) | C(99) <sup>3)</sup> | 3.5307(7) | F(18) | N(8) <sup>5)</sup>   | 3.58(1)  |
| F(18) | C(34) <sup>3)</sup> | 3.76(1)   | F(19) | H(27) <sup>5)</sup>  | 2.68     |
| F(19) | C(47) <sup>5)</sup> | 3.36(1)   | F(19) | H(21) <sup>1)</sup>  | 3.45     |
| F(19) | C(35) <sup>3)</sup> | 3.45(1)   | F(19) | H(18) <sup>3)</sup>  | 3.50     |
| F(19) | N(1) <sup>3)</sup>  | 3.57(1)   | F(19) | C(81) <sup>6)</sup>  | 3.70(1)  |
| F(19) | C(84) <sup>6)</sup> | 3.738(1)  | F(19) | H(15) <sup>3)</sup>  | 3.75     |
| F(20) | H(21) <sup>1)</sup> | 2.80      | F(20) | H(15) <sup>3)</sup>  | 3.23     |
| F(20) | H(27) <sup>5)</sup> | 3.26      | F(20) | C(39) <sup>1)</sup>  | 3.49(1)  |
| F(20) | N(4) <sup>1)</sup>  | 3.59(1)   | F(20) | C(81) <sup>6)</sup>  | 3.60(1)  |
| F(20) | C(84) <sup>6)</sup> | 3.6215(8) | F(21) | O(16) <sup>4)</sup>  | 3.61     |
| F(21) | C(98) <sup>4)</sup> | 3.6333(1) | F(22) | H(53) <sup>4)</sup>  | 2.77     |
| F(22) | H(52) <sup>4)</sup> | 3.20      | F(22) | C(70) <sup>4)</sup>  | 3.33(1)  |
| F(22) | C(69) <sup>4)</sup> | 3.57(1)   | F(23) | H(53) <sup>4)</sup>  | 2.34     |
| F(23) | H(26) <sup>5)</sup> | 2.76      | F(23) | C(70) <sup>4)</sup>  | 3.16(1)  |
| F(23) | C(46) <sup>5)</sup> | 3.20(1)   | F(23) | N(7) <sup>5)</sup>   | 3.43(1)  |
| F(23) | H(52) <sup>4)</sup> | 3.66      | F(24) | O(6) <sup>5)</sup>   | 2.998(7) |
| F(24) | H(53) <sup>4)</sup> | 3.13      | F(24) | H(26) <sup>5)</sup>  | 3.16     |

Table 6. Non-bonded Contacts out to 3.80 Å (continued)

| atom  | atom                 | distance | atom  | atom                 | distance  |
|-------|----------------------|----------|-------|----------------------|-----------|
| F(24) | C(46) <sup>5)</sup>  | 3.35(2)  | F(24) | H(12) <sup>5)</sup>  | 3.53      |
| F(24) | N(7) <sup>5)</sup>   | 3.69(1)  | F(25) | O(6) <sup>5)</sup>   | 3.088(7)  |
| F(25) | H(12) <sup>5)</sup>  | 3.15     | F(25) | C(99) <sup>3)</sup>  | 3.3186(5) |
| F(25) | C(24) <sup>5)</sup>  | 3.58(1)  | F(27) | C(98) <sup>4)</sup>  | 3.7444(2) |
| O(1)  | C(102) <sup>6)</sup> | 3.394(7) | O(2)  | C(102) <sup>6)</sup> | 3.551(7)  |
| O(2)  | H(61) <sup>5)</sup>  | 3.67     | O(3)  | H(26) <sup>5)</sup>  | 2.84      |
| O(3)  | C(46) <sup>5)</sup>  | 3.37(1)  | O(3)  | N(7) <sup>5)</sup>   | 3.40(1)   |
| O(3)  | H(53) <sup>4)</sup>  | 3.44     | O(3)  | H(61) <sup>5)</sup>  | 3.60      |
| O(4)  | H(45) <sup>4)</sup>  | 3.21     | O(4)  | H(53) <sup>4)</sup>  | 3.52      |
| O(5)  | H(35) <sup>2)</sup>  | 2.66     | O(5)  | C(101) <sup>1)</sup> | 3.569(7)  |
| O(5)  | C(54) <sup>2)</sup>  | 3.58(2)  | O(5)  | H(34) <sup>2)</sup>  | 3.58      |
| O(6)  | H(54) <sup>7)</sup>  | 3.65     | O(6)  | H(34) <sup>2)</sup>  | 3.74      |
| O(7)  | H(22) <sup>8)</sup>  | 2.55     | O(7)  | C(40) <sup>8)</sup>  | 3.30(1)   |
| O(7)  | N(4) <sup>8)</sup>   | 3.35(1)  | O(8)  | C(85) <sup>9)</sup>  | 3.794(7)  |
| O(9)  | H(27) <sup>3)</sup>  | 3.10     | O(9)  | H(21) <sup>1)</sup>  | 3.48      |
| O(9)  | N(3) <sup>1)</sup>   | 3.70(1)  | O(10) | H(44) <sup>4)</sup>  | 3.56      |
| O(11) | H(21) <sup>1)</sup>  | 2.41     | O(11) | C(39) <sup>1)</sup>  | 3.39(1)   |
| O(13) | H(4)                 | 2.40     | O(13) | H(17)                | 2.61      |
| O(13) | H(20)                | 2.71     | O(13) | O(17)                | 3.19(1)   |
| O(13) | C(8)                 | 3.36(2)  | O(13) | C(34)                | 3.51(2)   |
| O(13) | H(3)                 | 3.59     | O(13) | C(38)                | 3.68(2)   |
| O(14) | H(25)                | 2.49     | O(14) | H(28)                | 2.76      |
| O(14) | H(11)                | 2.78     | O(14) | C(44)                | 3.41(2)   |
| O(14) | C(48)                | 3.71(2)  | O(14) | C(24)                | 3.72(2)   |

Table 6. Non-bonded Contacts out to 3.80 Å (continued)

| atom  | atom                 | distance | atom  | atom                 | distance |
|-------|----------------------|----------|-------|----------------------|----------|
| O(15) | H(56)                | 2.66     | O(15) | H(47)                | 2.81     |
| O(15) | H(13)                | 2.86     | O(15) | H(51)                | 3.27     |
| O(15) | H(9)                 | 3.31     | O(15) | H(1)                 | 3.34     |
| O(15) | H(38)                | 3.35     | O(15) | H(29)                | 3.60     |
| O(15) | C(73)                | 3.60(1)  | O(15) | H(5)                 | 3.67     |
| O(15) | C(68)                | 3.71(1)  | O(15) | C(65)                | 3.74(1)  |
| O(16) | H(33) <sup>10)</sup> | 3.04     | O(16) | H(31) <sup>10)</sup> | 3.15     |
| O(16) | C(52) <sup>10)</sup> | 3.44(1)  | O(16) | C(50) <sup>10)</sup> | 3.69(1)  |
| O(16) | H(32) <sup>10)</sup> | 3.72     | O(16) | H(52)                | 3.73     |
| O(16) | C(51) <sup>10)</sup> | 3.78(1)  | O(17) | H(17)                | 3.06     |
| O(17) | N(6) <sup>6)</sup>   | 3.40(1)  | O(17) | N(1)                 | 3.59(1)  |
| O(17) | H(20)                | 3.65     | O(17) | C(93)                | 3.65(2)  |
| O(17) | C(34)                | 3.67(1)  | O(17) | C(94) <sup>6)</sup>  | 3.67(3)  |
| O(18) | N(6) <sup>6)</sup>   | 3.15(1)  | O(18) | C(43) <sup>6)</sup>  | 3.24(1)  |
| O(18) | H(24) <sup>6)</sup>  | 3.38     | O(18) | C(44) <sup>6)</sup>  | 3.65(1)  |
| O(18) | H(12) <sup>6)</sup>  | 3.71     | N(1)  | C(94) <sup>6)</sup>  | 3.47(3)  |
| N(1)  | N(8) <sup>6)</sup>   | 3.72(1)  | N(2)  | C(88) <sup>9)</sup>  | 3.39(2)  |
| N(2)  | C(86) <sup>9)</sup>  | 3.50(2)  | N(2)  | C(87) <sup>9)</sup>  | 3.66(2)  |
| N(2)  | C(83) <sup>9)</sup>  | 3.77(2)  | N(3)  | H(24) <sup>6)</sup>  | 2.50     |
| N(3)  | C(43) <sup>6)</sup>  | 3.46(2)  | N(3)  | H(65) <sup>11)</sup> | 3.75     |
| N(4)  | H(15) <sup>5)</sup>  | 2.72     | N(4)  | H(65) <sup>11)</sup> | 3.33     |
| N(4)  | C(32) <sup>5)</sup>  | 3.44(2)  | N(4)  | C(47) <sup>5)</sup>  | 3.47(2)  |
| N(4)  | N(8) <sup>5)</sup>   | 3.55(2)  | N(4)  | N(7) <sup>5)</sup>   | 3.64(2)  |
| N(4)  | C(48) <sup>5)</sup>  | 3.65(2)  | N(4)  | C(46) <sup>5)</sup>  | 3.74(2)  |

Table 6. Non-bonded Contacts out to 3.80 Å (continued)

| atom  | atom                | distance | atom  | atom                 | distance |
|-------|---------------------|----------|-------|----------------------|----------|
| N(4)  | C(45) <sup>5)</sup> | 3.79(2)  | N(6)  | C(100) <sup>1)</sup> | 3.27(1)  |
| N(6)  | C(94)               | 3.57(3)  | N(7)  | H(8) <sup>8)</sup>   | 2.55     |
| N(7)  | C(16) <sup>8)</sup> | 3.33(2)  | N(7)  | H(66) <sup>8)</sup>  | 3.61     |
| N(7)  | C(40) <sup>8)</sup> | 3.68(2)  | N(7)  | C(87) <sup>8)</sup>  | 3.73(2)  |
| N(8)  | H(18) <sup>1)</sup> | 2.39     | N(8)  | C(35) <sup>1)</sup>  | 3.31(2)  |
| N(8)  | H(21) <sup>8)</sup> | 3.66     | C(3)  | C(98) <sup>10)</sup> | 3.79(1)  |
| C(7)  | H(62) <sup>5)</sup> | 3.37     | C(8)  | C(102) <sup>6)</sup> | 3.39(1)  |
| C(9)  | H(61) <sup>5)</sup> | 2.88     | C(9)  | H(62) <sup>5)</sup>  | 3.61     |
| C(9)  | C(77) <sup>5)</sup> | 3.74(2)  | C(10) | H(61) <sup>5)</sup>  | 2.80     |
| C(10) | C(77) <sup>5)</sup> | 3.77(2)  | C(11) | H(61) <sup>5)</sup>  | 2.84     |
| C(11) | C(77) <sup>5)</sup> | 3.78(2)  | C(12) | H(61) <sup>5)</sup>  | 3.03     |
| C(13) | H(61) <sup>5)</sup> | 3.11     | C(13) | C(77) <sup>5)</sup>  | 3.79(2)  |
| C(14) | H(61) <sup>5)</sup> | 3.05     | C(14) | H(62) <sup>5)</sup>  | 3.34     |
| C(14) | C(77) <sup>5)</sup> | 3.75(2)  | C(15) | H(45) <sup>4)</sup>  | 3.47     |
| C(16) | H(26) <sup>5)</sup> | 3.35     | C(16) | C(46) <sup>5)</sup>  | 3.74(2)  |
| C(17) | H(45) <sup>4)</sup> | 2.78     | C(17) | C(63) <sup>4)</sup>  | 3.77(2)  |
| C(18) | H(45) <sup>4)</sup> | 3.28     | C(19) | H(35) <sup>2)</sup>  | 3.25     |
| C(19) | H(45) <sup>4)</sup> | 3.67     | C(19) | C(91)                | 3.78(2)  |
| C(20) | H(45) <sup>4)</sup> | 3.66     | C(20) | H(35) <sup>2)</sup>  | 3.66     |
| C(20) | C(91)               | 3.75(2)  | C(21) | H(45) <sup>4)</sup>  | 3.26     |
| C(21) | C(91)               | 3.77(2)  | C(22) | H(45) <sup>4)</sup>  | 2.81     |
| C(22) | C(63) <sup>4)</sup> | 3.77(2)  | C(23) | H(35) <sup>2)</sup>  | 3.69     |
| C(24) | C(99) <sup>1)</sup> | 3.24(1)  | C(24) | H(35) <sup>2)</sup>  | 3.77     |
| C(25) | H(54) <sup>7)</sup> | 2.94     | C(25) | C(71) <sup>7)</sup>  | 3.78(2)  |

Table 6. Non-bonded Contacts out to 3.80 Å (continued)

| atom  | atom                 | distance | atom  | atom                 | distance |
|-------|----------------------|----------|-------|----------------------|----------|
| C(26) | H(54) <sup>7)</sup>  | 3.10     | C(27) | H(54) <sup>7)</sup>  | 3.27     |
| C(27) | H(22) <sup>8)</sup>  | 3.61     | C(28) | H(54) <sup>7)</sup>  | 3.35     |
| C(29) | H(54) <sup>7)</sup>  | 3.17     | C(29) | H(55) <sup>7)</sup>  | 3.73     |
| C(29) | C(91)                | 3.76(2)  | C(30) | H(54) <sup>7)</sup>  | 3.01     |
| C(30) | C(91)                | 3.78(2)  | C(30) | C(71) <sup>7)</sup>  | 3.79(2)  |
| C(32) | H(22) <sup>8)</sup>  | 3.32     | C(35) | H(27) <sup>6)</sup>  | 3.41     |
| C(35) | C(86) <sup>9)</sup>  | 3.61(2)  | C(35) | C(47) <sup>6)</sup>  | 3.79(2)  |
| C(36) | C(88) <sup>9)</sup>  | 3.70(2)  | C(36) | C(83) <sup>9)</sup>  | 3.78(2)  |
| C(37) | H(61) <sup>5)</sup>  | 3.56     | C(38) | H(24) <sup>6)</sup>  | 3.70     |
| C(39) | H(24) <sup>6)</sup>  | 3.03     | C(39) | H(65) <sup>11)</sup> | 3.41     |
| C(39) | C(47) <sup>5)</sup>  | 3.65(2)  | C(39) | H(27) <sup>5)</sup>  | 3.66     |
| C(39) | H(15) <sup>5)</sup>  | 3.77     | C(40) | H(15) <sup>5)</sup>  | 3.31     |
| C(40) | H(61) <sup>5)</sup>  | 3.48     | C(40) | H(65) <sup>11)</sup> | 3.58     |
| C(40) | C(46) <sup>5)</sup>  | 3.63(2)  | C(42) | H(44) <sup>4)</sup>  | 3.66     |
| C(43) | H(21) <sup>1)</sup>  | 3.57     | C(44) | C(94)                | 3.69(3)  |
| C(44) | C(100) <sup>1)</sup> | 3.70(1)  | C(45) | H(22) <sup>8)</sup>  | 3.62     |
| C(46) | H(8) <sup>8)</sup>   | 3.21     | C(46) | H(53) <sup>7)</sup>  | 3.38     |
| C(46) | H(22) <sup>8)</sup>  | 3.40     | C(47) | H(18) <sup>1)</sup>  | 2.95     |
| C(47) | H(8) <sup>8)</sup>   | 3.59     | C(47) | H(21) <sup>8)</sup>  | 3.70     |
| C(47) | H(66) <sup>8)</sup>  | 3.75     | C(48) | H(18) <sup>1)</sup>  | 3.56     |
| C(49) | H(62) <sup>5)</sup>  | 3.20     | C(49) | H(64) <sup>10)</sup> | 3.59     |
| C(50) | H(59) <sup>10)</sup> | 3.32     | C(50) | H(64) <sup>10)</sup> | 3.50     |
| C(50) | H(57) <sup>10)</sup> | 3.78     | C(51) | H(59) <sup>10)</sup> | 3.17     |
| C(51) | H(62) <sup>5)</sup>  | 3.58     | C(51) | C(95) <sup>10)</sup> | 3.74(1)  |

Table 6. Non-bonded Contacts out to 3.80 Å (continued)

| atom  | atom                 | distance | atom  | atom                 | distance |
|-------|----------------------|----------|-------|----------------------|----------|
| C(52) | C(95) <sup>10)</sup> | 3.60(1)  | C(53) | C(102) <sup>6)</sup> | 3.69(2)  |
| C(54) | H(50) <sup>11)</sup> | 3.25     | C(54) | H(10) <sup>11)</sup> | 3.46     |
| C(55) | H(50) <sup>11)</sup> | 3.32     | C(55) | H(59) <sup>10)</sup> | 3.61     |
| C(55) | H(62) <sup>5)</sup>  | 3.63     | C(55) | H(63) <sup>5)</sup>  | 3.66     |
| C(55) | C(61) <sup>12)</sup> | 3.70(2)  | C(56) | H(59) <sup>10)</sup> | 2.81     |
| C(56) | H(62) <sup>5)</sup>  | 3.03     | C(56) | H(64) <sup>10)</sup> | 3.35     |
| C(56) | H(63) <sup>5)</sup>  | 3.39     | C(56) | C(74) <sup>10)</sup> | 3.67(2)  |
| C(57) | H(46) <sup>4)</sup>  | 3.41     | C(59) | H(36) <sup>12)</sup> | 3.54     |
| C(59) | H(49) <sup>4)</sup>  | 3.72     | C(60) | H(36) <sup>12)</sup> | 3.03     |
| C(60) | H(63) <sup>10)</sup> | 3.05     | C(61) | H(36) <sup>12)</sup> | 2.76     |
| C(61) | H(63) <sup>10)</sup> | 3.00     | C(61) | C(98)                | 3.56(2)  |
| C(61) | C(79) <sup>10)</sup> | 3.59(2)  | C(62) | H(36) <sup>12)</sup> | 3.05     |
| C(62) | H(23) <sup>4)</sup>  | 3.63     | C(63) | H(49) <sup>4)</sup>  | 3.24     |
| C(63) | H(36) <sup>12)</sup> | 3.53     | C(63) | H(39) <sup>4)</sup>  | 3.64     |
| C(64) | H(49) <sup>4)</sup>  | 2.99     | C(64) | H(39) <sup>4)</sup>  | 3.27     |
| C(64) | H(51) <sup>4)</sup>  | 3.57     | C(64) | C(66) <sup>4)</sup>  | 3.75(2)  |
| C(64) | C(68) <sup>4)</sup>  | 3.77(2)  | C(64) | H(36) <sup>12)</sup> | 3.79     |
| C(65) | H(55) <sup>7)</sup>  | 3.69     | C(65) | C(95)                | 3.75(1)  |
| C(66) | H(46) <sup>4)</sup>  | 3.56     | C(66) | H(35) <sup>2)</sup>  | 3.80     |
| C(67) | H(41) <sup>4)</sup>  | 3.01     | C(67) | H(46) <sup>4)</sup>  | 3.43     |
| C(68) | H(41) <sup>4)</sup>  | 2.98     | C(68) | H(46) <sup>4)</sup>  | 3.05     |
| C(68) | C(96)                | 3.60(1)  | C(68) | C(95)                | 3.62(1)  |
| C(68) | H(39) <sup>4)</sup>  | 3.76     | C(69) | H(41) <sup>4)</sup>  | 3.04     |
| C(69) | H(6) <sup>4)</sup>   | 3.24     | C(69) | H(39) <sup>4)</sup>  | 3.62     |

Table 6. Non-bonded Contacts out to 3.80 Å (continued)

| atom  | atom                 | distance | atom  | atom                 | distance |
|-------|----------------------|----------|-------|----------------------|----------|
| C(70) | H(41) <sup>4)</sup>  | 3.09     | C(70) | H(6) <sup>4)</sup>   | 3.11     |
| C(70) | H(26) <sup>7)</sup>  | 3.26     | C(71) | H(41) <sup>4)</sup>  | 3.09     |
| C(71) | H(60) <sup>7)</sup>  | 3.22     | C(71) | H(58) <sup>7)</sup>  | 3.42     |
| C(71) | H(26) <sup>7)</sup>  | 3.52     | C(71) | H(48) <sup>7)</sup>  | 3.60     |
| C(72) | H(41) <sup>4)</sup>  | 3.08     | C(72) | H(58) <sup>7)</sup>  | 3.15     |
| C(72) | H(48) <sup>7)</sup>  | 3.21     | C(72) | H(60) <sup>7)</sup>  | 3.67     |
| C(73) | H(32) <sup>10)</sup> | 3.32     | C(74) | H(55) <sup>7)</sup>  | 3.25     |
| C(74) | H(37) <sup>10)</sup> | 3.26     | C(74) | H(32) <sup>10)</sup> | 3.31     |
| C(75) | H(37) <sup>10)</sup> | 3.26     | C(76) | H(40) <sup>8)</sup>  | 3.25     |
| C(76) | H(54) <sup>7)</sup>  | 3.69     | C(76) | H(22) <sup>8)</sup>  | 3.72     |
| C(76) | H(41) <sup>8)</sup>  | 3.74     | C(77) | H(40) <sup>8)</sup>  | 3.05     |
| C(77) | H(22) <sup>8)</sup>  | 3.41     | C(77) | H(30) <sup>8)</sup>  | 3.79     |
| C(78) | H(30) <sup>8)</sup>  | 3.11     | C(78) | H(37) <sup>8)</sup>  | 3.34     |
| C(78) | H(43) <sup>10)</sup> | 3.60     | C(78) | H(40) <sup>8)</sup>  | 3.73     |
| C(78) | H(42) <sup>8)</sup>  | 3.78     | C(79) | H(43) <sup>10)</sup> | 2.85     |
| C(79) | H(63) <sup>13)</sup> | 3.28     | C(79) | H(42) <sup>10)</sup> | 3.34     |
| C(79) | H(37) <sup>8)</sup>  | 3.34     | C(79) | C(79) <sup>13)</sup> | 3.71(2)  |
| C(79) | H(37) <sup>10)</sup> | 3.77     | C(80) | H(37) <sup>10)</sup> | 2.87     |
| C(80) | H(43) <sup>10)</sup> | 3.26     | C(80) | H(63) <sup>13)</sup> | 3.43     |
| C(80) | H(42) <sup>10)</sup> | 3.60     | C(80) | H(32) <sup>10)</sup> | 3.71     |
| C(81) | H(27) <sup>3)</sup>  | 3.65     | C(84) | H(27) <sup>3)</sup>  | 3.53     |
| C(85) | H(43) <sup>4)</sup>  | 3.73     | C(86) | H(21) <sup>1)</sup>  | 3.27     |
| C(89) | H(21) <sup>1)</sup>  | 3.32     | C(89) | H(27) <sup>5)</sup>  | 3.72     |
| C(90) | H(53) <sup>4)</sup>  | 3.66     | C(91) | H(11)                | 3.35     |

Table 6. Non-bonded Contacts out to 3.80 Å (continued)

| atom   | atom                 | distance | atom   | atom                 | distance |
|--------|----------------------|----------|--------|----------------------|----------|
| C(91)  | H(4)                 | 3.47     | C(91)  | H(16)                | 3.63     |
| C(91)  | H(25)                | 3.71     | C(91)  | H(7)                 | 3.76     |
| C(92)  | H(4)                 | 3.26     | C(92)  | H(25)                | 3.34     |
| C(92)  | H(20)                | 3.49     | C(92)  | H(28)                | 3.50     |
| C(92)  | H(11)                | 3.53     | C(92)  | H(16)                | 3.57     |
| C(92)  | H(17)                | 3.59     | C(93)  | H(25)                | 3.09     |
| C(93)  | H(28)                | 3.30     | C(94)  | H(25)                | 3.07     |
| C(94)  | H(28)                | 3.32     | C(95)  | H(47)                | 3.19     |
| C(95)  | H(59)                | 3.33     | C(95)  | H(48)                | 3.38     |
| C(95)  | H(55) <sup>7)</sup>  | 3.41     | C(95)  | H(50) <sup>7)</sup>  | 3.63     |
| C(95)  | H(56)                | 3.63     | C(95)  | H(13)                | 3.69     |
| C(95)  | H(58)                | 3.69     | C(96)  | H(56)                | 3.13     |
| C(96)  | H(47)                | 3.23     | C(96)  | H(51)                | 3.45     |
| C(96)  | H(13)                | 3.53     | C(96)  | H(59)                | 3.69     |
| C(97)  | H(31) <sup>10)</sup> | 3.07     | C(97)  | H(33) <sup>10)</sup> | 3.43     |
| C(98)  | H(43)                | 3.19     | C(98)  | H(31) <sup>10)</sup> | 3.39     |
| C(98)  | H(57) <sup>10)</sup> | 3.42     | C(98)  | H(33) <sup>10)</sup> | 3.52     |
| C(98)  | H(19) <sup>10)</sup> | 3.67     | C(99)  | H(12) <sup>6)</sup>  | 2.29     |
| C(99)  | H(66) <sup>14)</sup> | 2.80     | C(99)  | H(11) <sup>6)</sup>  | 3.68     |
| C(100) | H(12) <sup>6)</sup>  | 3.10     | C(100) | H(25) <sup>6)</sup>  | 3.79     |
| C(101) | H(12) <sup>6)</sup>  | 3.49     | C(101) | H(35) <sup>1)</sup>  | 3.57     |
| C(101) | H(34) <sup>1)</sup>  | 3.59     | C(102) | H(3) <sup>1)</sup>   | 2.94     |
| C(102) | H(34) <sup>1)</sup>  | 3.47     | C(102) | H(65) <sup>6)</sup>  | 3.62     |
| H(2)   | H(62) <sup>5)</sup>  | 3.06     | H(5)   | H(61) <sup>5)</sup>  | 3.73     |

Table 6. Non-bonded Contacts out to 3.80 Å (continued)

| atom  | atom                 | distance | atom  | atom                 | distance |
|-------|----------------------|----------|-------|----------------------|----------|
| H(6)  | H(53) <sup>4)</sup>  | 2.97     | H(6)  | H(52) <sup>4)</sup>  | 3.17     |
| H(6)  | H(45) <sup>4)</sup>  | 3.25     | H(8)  | H(26) <sup>5)</sup>  | 3.03     |
| H(8)  | H(27) <sup>5)</sup>  | 3.65     | H(10) | H(35) <sup>2)</sup>  | 2.94     |
| H(10) | H(34) <sup>2)</sup>  | 3.69     | H(12) | H(34) <sup>2)</sup>  | 3.72     |
| H(12) | H(66) <sup>8)</sup>  | 3.76     | H(13) | H(55) <sup>7)</sup>  | 3.58     |
| H(13) | H(54) <sup>7)</sup>  | 3.63     | H(15) | H(22) <sup>8)</sup>  | 3.06     |
| H(18) | H(27) <sup>6)</sup>  | 2.69     | H(18) | H(28) <sup>6)</sup>  | 3.77     |
| H(21) | H(24) <sup>6)</sup>  | 2.75     | H(21) | H(27) <sup>5)</sup>  | 3.62     |
| H(21) | H(65) <sup>11)</sup> | 3.75     | H(22) | H(61) <sup>5)</sup>  | 2.81     |
| H(22) | H(60) <sup>5)</sup>  | 3.39     | H(22) | H(26) <sup>5)</sup>  | 3.42     |
| H(23) | H(44) <sup>4)</sup>  | 2.79     | H(23) | H(45) <sup>4)</sup>  | 3.42     |
| H(26) | H(53) <sup>7)</sup>  | 2.42     | H(26) | H(54) <sup>7)</sup>  | 3.05     |
| H(29) | H(64) <sup>10)</sup> | 3.74     | H(30) | H(62) <sup>5)</sup>  | 2.46     |
| H(30) | H(64) <sup>10)</sup> | 2.96     | H(30) | H(61) <sup>5)</sup>  | 3.76     |
| H(32) | H(59) <sup>10)</sup> | 2.65     | H(32) | H(57) <sup>10)</sup> | 2.81     |
| H(32) | H(64) <sup>10)</sup> | 2.88     | H(32) | H(56) <sup>10)</sup> | 3.32     |
| H(35) | H(50) <sup>11)</sup> | 3.21     | H(35) | H(49) <sup>11)</sup> | 3.55     |
| H(36) | H(43) <sup>12)</sup> | 3.10     | H(36) | H(63) <sup>5)</sup>  | 3.24     |
| H(36) | H(50) <sup>11)</sup> | 3.24     | H(36) | H(42) <sup>12)</sup> | 3.39     |
| H(36) | H(44) <sup>12)</sup> | 3.48     | H(36) | H(49) <sup>11)</sup> | 3.59     |
| H(36) | H(62) <sup>5)</sup>  | 3.77     | H(37) | H(64) <sup>10)</sup> | 2.41     |
| H(37) | H(59) <sup>10)</sup> | 2.54     | H(37) | H(63) <sup>5)</sup>  | 2.70     |
| H(37) | H(62) <sup>5)</sup>  | 2.71     | H(38) | H(46) <sup>4)</sup>  | 3.75     |
| H(39) | H(46) <sup>4)</sup>  | 2.41     | H(39) | H(45) <sup>4)</sup>  | 3.14     |

Table 6. Non-bonded Contacts out to 3.80 Å (continued)

| atom  | atom                 | distance | atom  | atom                 | distance |
|-------|----------------------|----------|-------|----------------------|----------|
| H(39) | H(52) <sup>4)</sup>  | 3.50     | H(39) | H(51) <sup>4)</sup>  | 3.76     |
| H(40) | H(61) <sup>5)</sup>  | 3.00     | H(40) | H(60) <sup>5)</sup>  | 3.31     |
| H(41) | H(60) <sup>5)</sup>  | 3.44     | H(41) | H(51) <sup>4)</sup>  | 3.49     |
| H(41) | H(52) <sup>4)</sup>  | 3.57     | H(41) | H(53) <sup>4)</sup>  | 3.66     |
| H(41) | H(55) <sup>4)</sup>  | 3.67     | H(41) | H(54) <sup>4)</sup>  | 3.70     |
| H(41) | H(49) <sup>4)</sup>  | 3.80     | H(42) | H(63) <sup>10)</sup> | 2.56     |
| H(42) | H(64) <sup>10)</sup> | 3.13     | H(43) | H(63) <sup>10)</sup> | 2.49     |
| H(43) | H(64) <sup>10)</sup> | 3.25     | H(45) | H(49) <sup>4)</sup>  | 3.19     |
| H(46) | H(51) <sup>4)</sup>  | 2.71     | H(46) | H(49) <sup>4)</sup>  | 2.85     |
| H(46) | H(46) <sup>4)</sup>  | 2.90     | H(48) | H(55) <sup>7)</sup>  | 2.77     |
| H(48) | H(54) <sup>7)</sup>  | 3.46     | H(48) | H(48) <sup>7)</sup>  | 3.73     |
| H(54) | H(60) <sup>7)</sup>  | 2.78     | H(54) | H(58) <sup>7)</sup>  | 2.98     |
| H(55) | H(58) <sup>7)</sup>  | 2.45     | H(55) | H(59) <sup>7)</sup>  | 3.27     |
| H(55) | H(60) <sup>7)</sup>  | 3.61     | H(63) | H(63) <sup>13)</sup> | 3.13     |
| H(63) | H(64) <sup>13)</sup> | 3.41     |       |                      |          |

### Symmetry operations

- |      |                      |      |                      |
|------|----------------------|------|----------------------|
| (1)  | $X, -Y+1/2, Z-1/2$   | (2)  | $X, Y, Z-1$          |
| (3)  | $X-1, -Y+1/2, Z-1/2$ | (4)  | $-X+2, -Y, -Z+2$     |
| (5)  | $X-1, Y, Z$          | (6)  | $X, -Y+1/2, Z+1/2$   |
| (7)  | $-X+3, -Y, -Z+2$     | (8)  | $X+1, Y, Z$          |
| (9)  | $X+1, Y, Z+1$        | (10) | $-X+3, -Y, -Z+3$     |
| (11) | $X, Y, Z+1$          | (12) | $-X+2, -Y, -Z+3$     |
| (13) | $-X+4, -Y, -Z+3$     | (14) | $X+1, -Y+1/2, Z+1/2$ |
