# Supplementary material for: An analysis of the Wheeler-Lea act and its administrative agency, the Federal Trade Commission
Source: Royal Society of Chemistry journal article supplement (doi:10.1039/b415374j), 1951-01-01
Supplement: b415374j(3).pdf [file b415374j%283%29.pdf]

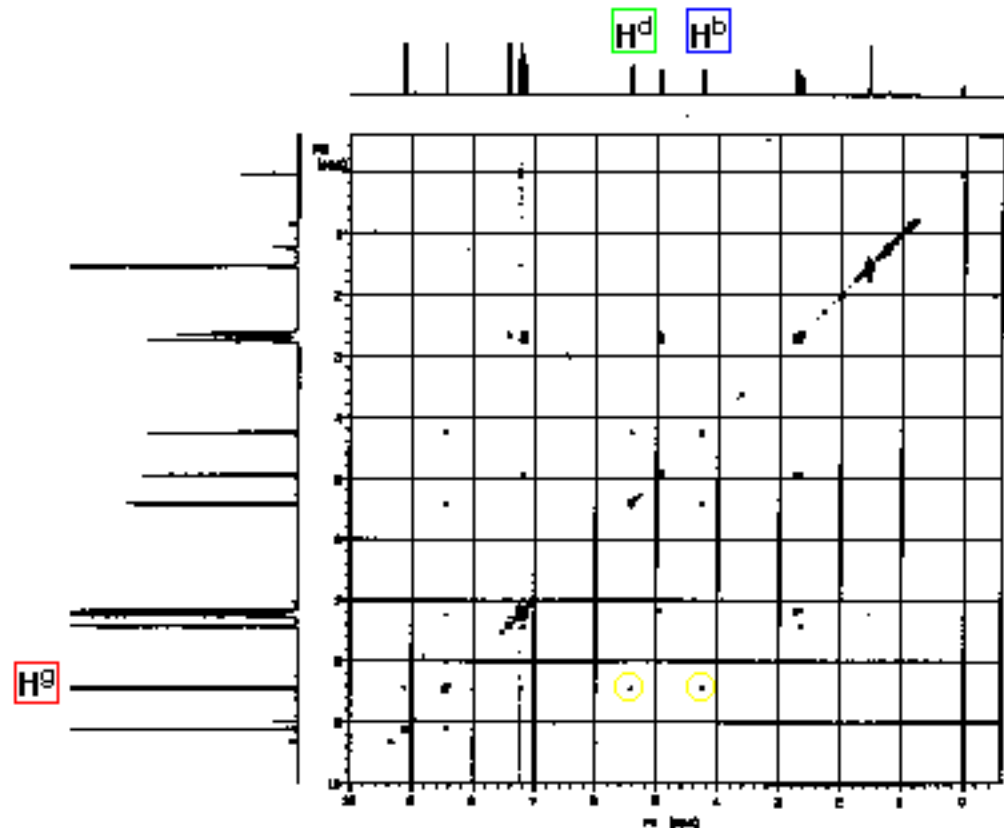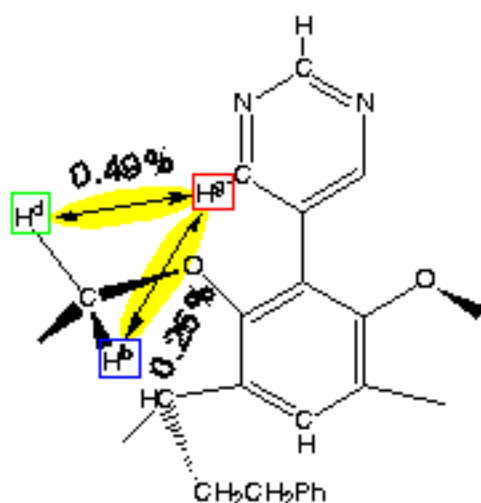

Fig 1S.  $^1\text{H}$ - $^1\text{H}$ -2D-ROESY spectrum on a cavitand ligand in  $\text{CDCl}_3$ . The values of NOE between one  $\text{H}^a$  proton in a 3 or 5 position of the pyrimidyl groups and two protons,  $\text{H}^b$  and  $\text{H}^d$ , of the bridging methylene are shown in 0.25% and 0.49%, respectively.

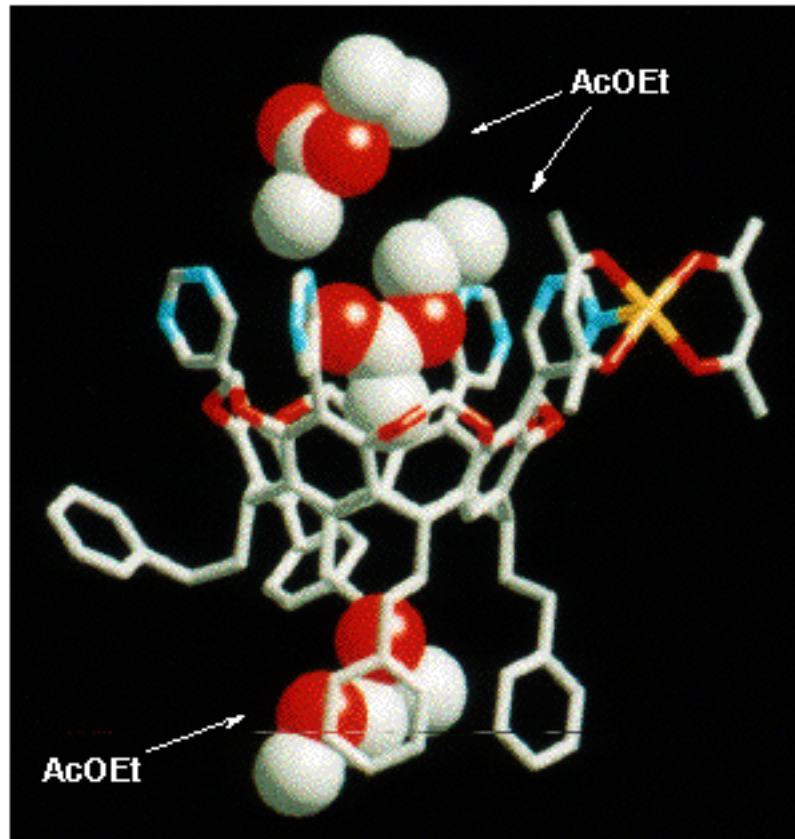

Fig. 2S The asymmetry unit of the crystal: The unit is constructed from a Mn complex with a cavitaand ligand, one AcOEt molecule into the cavitaand cavity and two AcOEt with heavy disordering. The white, red, blue and yellow atoms represent a carbon, an oxygen, a nitrogen atoms and a manganese (II) ions, respectively.

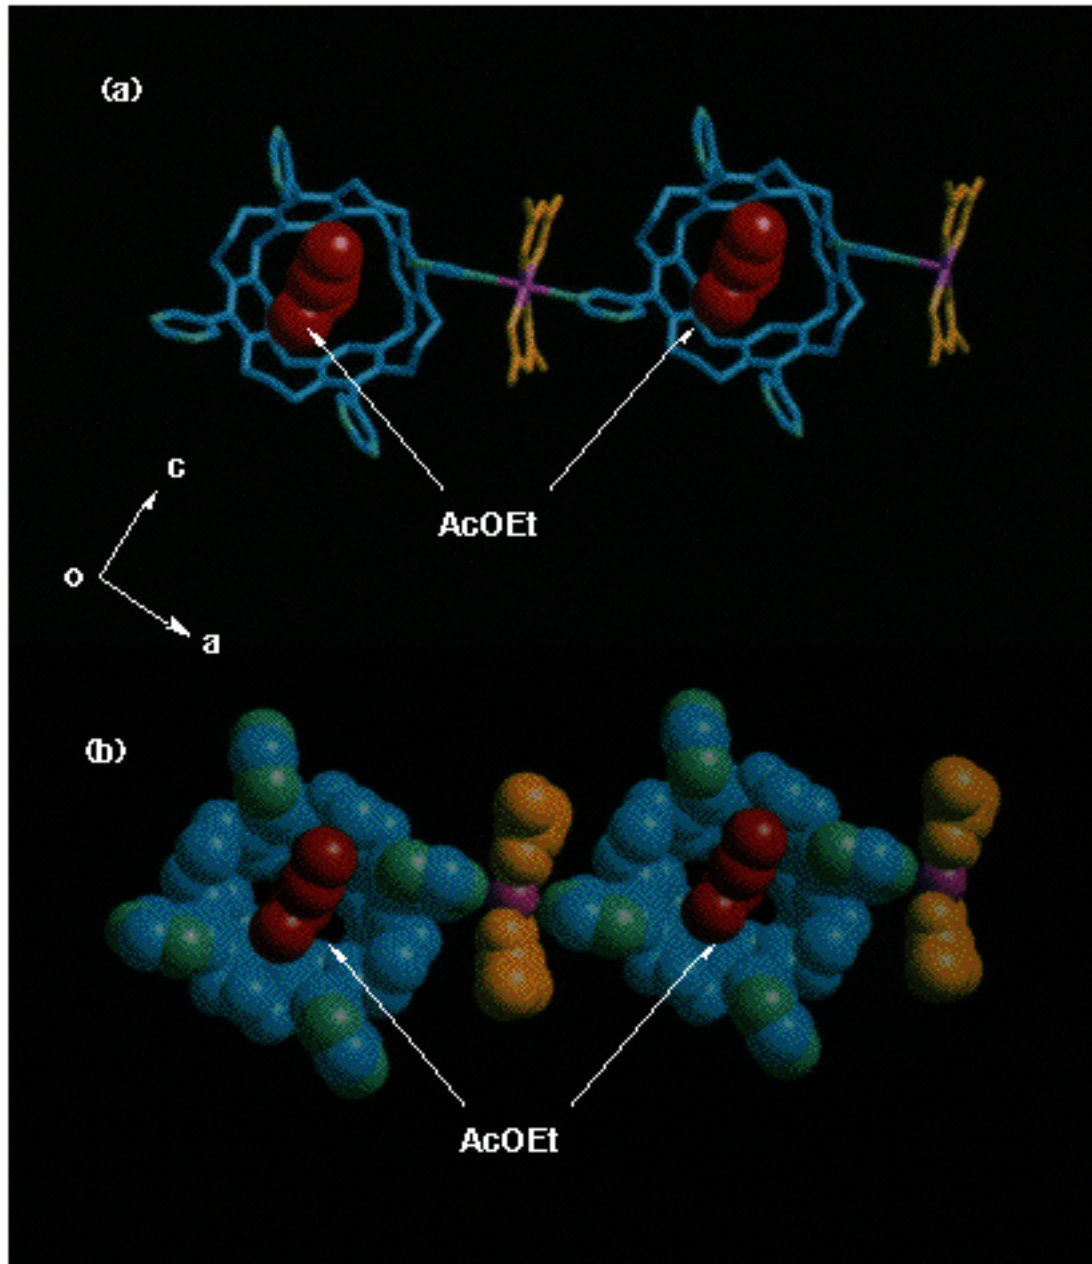

Fig. 3S the upper views of the one-dimensional Mn (II) coordination polymer with cavitaand ligands: (a) the coordination polymer is represented by a cylinder model (except for the included AcOEt molecules shown in a red ball model). The framework of the cavitaand ligand is shown in blue, and a manganese ion and acetylacetonate ligands are in magenta and yellow, respectively. (b) It is represented by a ball model based on van der Waal's radius.



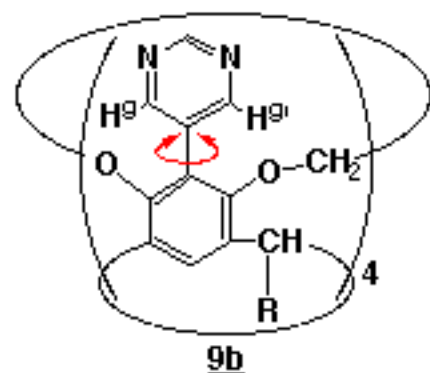

$T_c = -75^\circ\text{C}$   
 $\Delta G^\ddagger = 40\text{kJ}\cdot\text{mol}^{-1}$

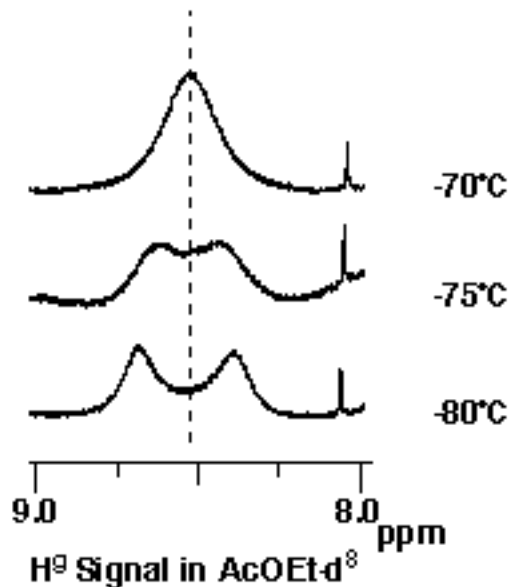

**Fig. 5S** the H<sup>a</sup> signals in <sup>1</sup>H-NMR spectra in AcOEt-d<sup>8</sup> depending upon the temperatures are indicated a coalescence phenomenon at -75°C. The activated energy of ~40 kJ/mol is estimated from the temperature.

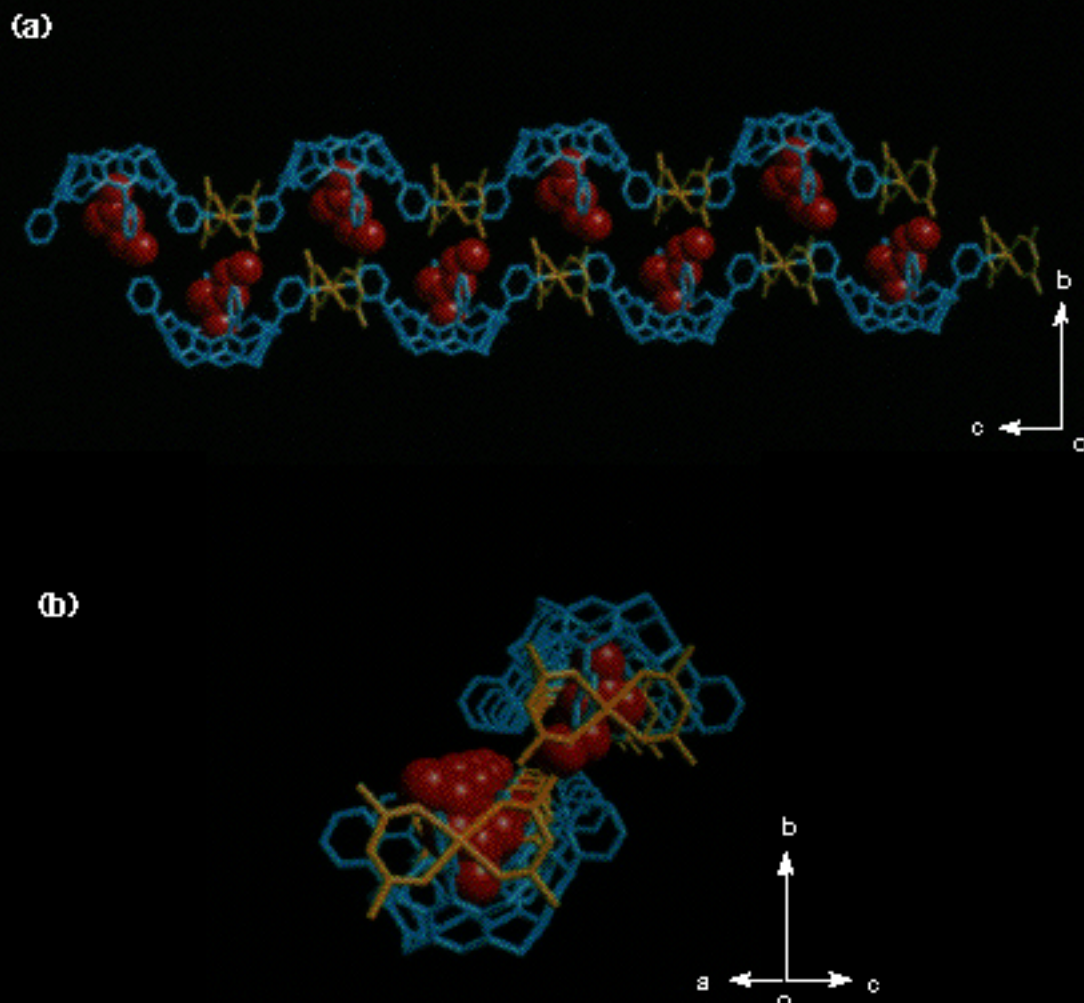

**Fig. 6S (a) the projection through the  $a$  axis on two chains of the coordination polymers: It is understood that the cavitated ligands form no capsule formation. (b) The perspective view of two polymer chains along the diagonal lines in  $ac$  plane.**

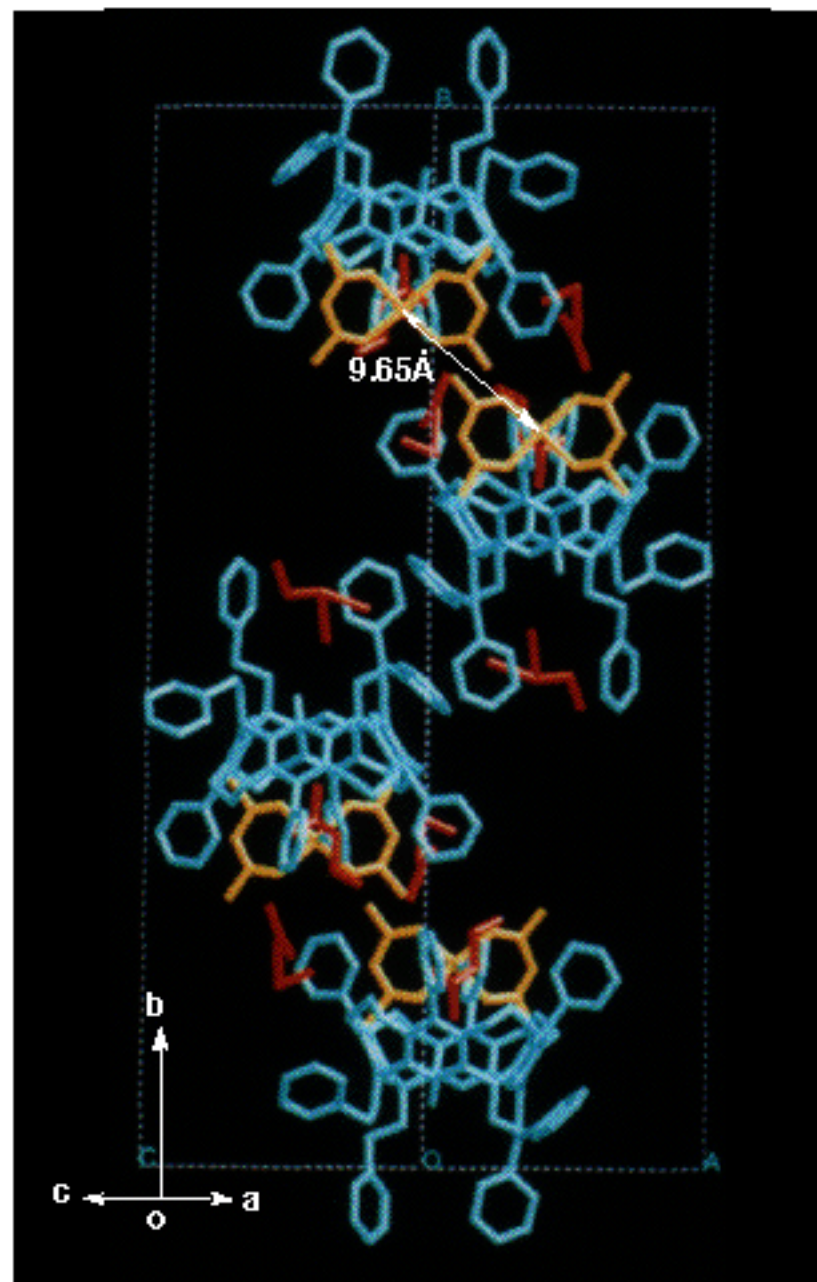

Fig 7S the locations of the coordination polymers in crystal: The one-dimensional polymer chains are directed to a diagonal line in the *ac* plane. The cavitaad ligands, AcOEt molecules and acetylacetonato Mn (II) complexes are shown in blue, red and yellow lines, respectively.
